# Supplementary material for: The Complete Chloroplast Genome of Tree Fern Cyathea delgadii and Its Comparison to other Cyatheales
Source: Research Square preprint supplement (doi:10.21203/rs.3.rs-6750372/v1), 2025-06-17
Supplement: Supplementary file 1 [file 4dcff7b85e3ae3e7302b7f20.docx]

>rbcL

ATGTCACCACAAACGGAGACTAAAGCAGGTGTTGGATTCAAAGCTGGTGTTAAAGATTATCGATTGACCT

ATTACACTCCCAAGTATGAGACCAAAGACACCGATATCTTGGCAGCCTTTCGAATGACCCCGCAACCCGG

AGTACCGCCTGAGGAAGCTGGAGCTGCAGTAGCTGCGGAATCTTCCACAGGTACATGGACCACTGTATGG

ACGGATGGACTTACTAGTCTCGATCGCTACAAAGGCCGATGCTATGATATCGAACCTGTTGCTGGGGAGG

ATAATCAGTATATTGCATATGTAGCTTATCCTTTGGATCTATTTGAAGAAGGTTCCGTTACCAATATGTT

CACTTCCATTGTAGGTAACGTTTTTGGATTCAAGGCCTTACGCGCTCTCCGCTTAGAAGATCTTCGAATT

CCTCCTGCTTATTCTAAAACTTTCATTGGACCGCCCCATGGTATCCAGGTTGAAAGGGATAAGCTAAACA

AATATGGGCGTCCCTTATTAGGATGTACAATCAAGCCAAAATTGGGCTTATCCGCTAAAAATTATGGGAG

AGCCGTTTATGAATGTCTCCGTGGTGGACTTGACTTCACCAAGGATGATGAGAACGTAAATTCCCAACCA

TTCATGCGTTGGAGAGATCGTTTCTTATTCGTAGCAGAAGCTCTCTTCAAATCTCAGGCCGAAACGGGCG

AAATTAAGGGACATTACTTAAACGCTACTGCAGGTACGTGTGAAGAAATGTTGAAAAGGGCCCGTTTTGC

TAGAGAATTGGGGGCACCAATTGTAATGCATGACTATCTGACCGGAGGGTTTACCGCAAATACTAGCTTG

GCCTTCTATTGTCGAGATAATGGGCTGCTTCTTCACATTCACCGTGCAATGCATGCTGTCATCGATAGAC

AGAAAAATCACGGTATACATTTTCGTGTATTAGCAAAAGCATTACGTATGTCCGGTGGAGATCATATTCA

CGCTGGGACTGTAGTAGGCAAACTAGAGGGAGAACGAGAAGTCACTTTGGGTTTTGTCGATTTGCTTCGT

GACGATTATATTGAAAAAGACCGTAGCCGCGGCATCTATTTCACCCAAGATTGGGTATCTATGCCGGGCG

TACTTCCCGTAGCTTCGGGGGGTATCCACGTATGGCATATGCCTGCTCTAACCGAAATCTTCGGGGACGA

TTCTGTCTTACAGTTCGGCGGAGGAACCTTGGGACATCCTTGGGGAAATGCGCCCGGTGCCGTAGCTAAT

CGAGTCGCGTTAGAGGCTTGTGTACAAGCTCGTAATGAGGGCCGTGACCTTGCTCGTGAAGGTAATGAAA

TTATCCGTGAAGCTAGTAAGTGGAGTCCTGAATTGGCTGCCGCCTGCGAGGTATGGAAAGAAATCAAATT

TGAATTTGAGACAATTGATACATTGTAA

>trnT-GGU

GCCCTTTTAACTCAGTGGTAGAGTACCGCCATGGTAAGGCGTAAGTCGTCGGTTCAAATCCGATAAGGGG

CT

>trnG-GCC

GCGGATATAGTTGAATGGTAAAATATCTCCTTGCCAAGGAGATGACGCGGGTTCGATTCCCGCTATCCGC

C

>psaM

ATGGAATCAATTTCGGACATTCAACTTCTTTTGGCACTTATTTGTGCTTCTGCAACAAGCATCTTAGTTG

CGAGATTGGCTATTGCACTGTACCGTTAA

>trnK

GGGTGTATAGCTCAGTTGGTAGAGCATTGGGCTTTTAATCTAATGGTCGCAGGTTCGAGTCCTGCTATAC

CCA

>rrn16

TCTCATGGAGAGTTTGATCCTGGCTCAGGATGAACGCTGGCGGCATGCCTAACACATGCAAGTCGGACGG

GAAGCATCCTCATGGTGTTTCCAGTGGCGGACGGGTGAGTAACGCGTAAGAACCTGCCCTTGGGAGGGGG

ACAACAGCTGGAAACGGTTGCTAATACCCCATAGGCTGAGGAGCGAAAGGGAGGGATCCGCCCGAGGAGG

GGCTTGCGTCTGATTAGCTGGTTGGTGAGGCAGTGGCTTACCAAGGCGACGATCAGTAGCTGGTCTGAGA

GGATGATCAGCCACACTGGGACTGAGACACGGCCCAGACTCCTACGGGAGGCAGCAGTGGGGAATCTTCC

GCAATGGGCGAAAGCCTGACGGAGCAATGCCGCGTGGAGGTAGAAGGCCCACGGGTCGTAAACTCCTTTT

CTCGGAGAAGAAGCAATGACGGTATCTGAGGAATAAGCATCGGCTAACTCTGTGCCAGCAGCCGCGGTAA

GACAGGGGATGCAAGCGTTATCCGGAATGATTGGGCGTAAAGCGTCTGTAGGTGGCTCCTTAAGTCCGCT

GTCAAATCCCAGGGCTCAACCCTGGACAGGCGGTGGAAACTACTAAGCTAGAGTACGGTAGGGGCAGAGG

GAATTTTCGGTGGAGCGGTGAAATGCGTAGAGATCGAAAAGAACACCAAAGGCGAAGGCACTCTGCTGGG

CCGACACTGACACTGAGAGACGAAAGCTAGGGGAGCGAATGGGATTAGATACCCCAGTAGTCCTAGCCGT

AAACGATGGATACTAAGCGCTGTGCGTATCGACCCGTGCAGTGCTGTAGCTAACGCGTTAAGTATCCCGC

CTGGGGAGTACGTTCGCAAGAATGAAACTCAAAGGAATTGACGGGGGCCCGCACAAGCGGTGGAGCATGT

GGTTTAATTCGATGCAACGCGAAGAACCTTACCAGGGCTTGACATGCTGCGAATCCTCCTGAAAGAGAGG

AGTGCCTTCGGGAACGCGGACACAGGTGGTGCATGGCTGTCGTCAGCTCGTGCCGTAAGGTGTTGGGTTA

AGTCCCGCAACGAGCGCAACCCTCGTGTTTAGTTGCCACTACTAAGTTTGGAACCCTAAACAGACTGCCG

GTGATAAGCCGGAGGAAGGTGGGGATGACGTCAAGTCAGCATGCCCCTTACGCCCTGGGCGACACACGTG

CTACAATGGCCGGGACAAAGAGCCGCGACCCCGCGAGGGCAAGCTAACCTCAGAAACTCGGTCTCAGTTC

GGATTGCAGGCTGCAACTCGCCTGCATGAAGCCGGAATCGCTAGTAATCGCCGGTCAGCCATACGGCGGT

GAATCCGTTCCCGGGCCTTGTACACACCGCCCGTCACACTATGGGAGCTGGCCATGCCCGAAGTCGTTAG

CTTAACCGCAAGGAGGGGGATGCCTAAGGCAGGGCTAGTGACTGGAGTGAAGTCGTAACAAGGTAGCCGT

ACCGGAAGGTGCGGCTGGATCACCTCCTTT

>rrn5

GATATTCTGGTGTCTCAGGCGTGGAGGAACCACACCGATCCATCTCGAACTTGGTGGTGAAACTCTACCG

CGGTAACGATACTGCAGGGGGGGCTCTGCGGAAAAATAGCTCGACGCCAGGAT

>ccsA

ATGTACATTGATATAGAGCACATATTCGCTCACATTCCCTTTCTTATGCTTTTTCCTGTTACTTTGCCGC

ATTGGATCGATCTAGCTTATAGGCCTCATAGACTGAATAGTTTGAATAGAAAAGTTATGACAATTGCTTT

TCTTCGTACAACAGGATTTCTGTTAATTCGTTGGGTCCAAACCAAGCATTTACCATCGAGTAATCTATAC

GAATCATCCATGTTCCTTTCATGGAGCTTCTCCCTATCGTACATAATATTGAAGATTAGACATCAGAATG

AGTGGTCAGGTGCAGTCACGGCACCAAGTGCTATGCTTACTCATGCCTTTGCTACTTCAGGTCTTCCTGA

AGGAATGCAACAATCCACGCAGCTAGTACCCGCTTTGCAGTCTCATCGGTTAATGATGCATGTGAGTATG

ATGTTACTGAGCCATGCAACCCTGTTACGTGGATCCCTATCAGCAATATCTTTACCGATTGTTTCTTTTG

ATAAAATGAATAGATCTTCTATTCCCAACTTGATGAACCATCAATCGATTTGCAAATTGTGCAACCGATT

CTTGAATACAAATAGTTATTATCACGATCAAAAACAAACTGACATGGATAATCCTTTCTACCTGTTATCC

TTAAATTCACGCAAGTGCCAGTTGATTAATCAATTGGATCAATGGGCTTATCAAATTATAAGCTTAGGGT

TTTCCTTTCTAACTATTGGTATTCTTCCCGGAGCAGTGTGGGCTAATGAAGCATGGGGATCTTACTGGAG

CTGGGATCCCAAAGAAACTTGGGCATTAGTGACTTGGCTAATACATGCTATTTATCTTCATACCAGGATA

ACTAAGAGTTGGGGGGGAGAGGCATCCGCCGCAGTGGCATCTACAGGATTCTTTTTGGTTTGGATTCGTT

TTTCGGGAGTCAATCTATTGGGAATCGGATTACACAACTATGGATGGTTAATCTGA

>ndhF

ATGTTCGCGGAATTTTCATATGAATATGTTTGGATCGTTCCTTCGTGCCCACTAGTAGCTTCCGGCTCAA

CTGGATTAGTATCGTTCTTACTCCCAAAAGCTACGAAAGGTCTTCGCCGCTCATGTGCCGCGTTCAGTAT

TCTCTCACTAACTGTTTCTATGTTTATTTCCTTTCTTTTCTTCTGGCAACAAAATGTTAGTCACTCCACC

CAAGAGTATTTGTGGTCATGGATCCTTAAAGATGATATTTCCCTGAAAATAGGTTTCTTGGTAGATCCAC

TCGCTCTTATTATGTCAATATTAGTTACTACTGTAGGTATCTCAGTCACGATTTACAGTGATAGTTATAC

GTGTCACGACTAAGGATATGCAAGGTTTTCCGCTTATTTGAGTTTATTCACCGCGTCAATGTTAGGATTA

GTCTTCAGTCCTAATTTGATACAGATTTATGTGTTCTGGGAATTAGTGGGGATGCGTTCTTACTCGTTAA

TAGGTTTCTGGTTTGTGCGACCTAGTGCTGCCAATGCCTGTCAAAAAGCTTTTGTAACCAACCGTATAGG

AGATTTTGGGTTGTTATTGGGTATATTGGGTATCTATTGGATAACCGGTAGCTTCGAGATTTATGAATTG

TGTGATTGATTCATTGAATTAATTAGTAGCGGTAGTGTTAACCCCGTCCTCGCTAATATAATAGCTCTTC

TACTATTTTCAGGGCCAGTGGCTAAGTCTGCGCAATTTCCACTCCACGTATGGTTGCCGGATGCAATGGA

GGGACCCACCCCTATATCAGCTCTTATACATGCTGCTACTATGGTAGCTGCTGGAATCTTTTTCATAGCT

CGAATCCTTAACCTGATTGAAATATTACCCTTGAGTATGAGTGTTATTTCTTGGGTAGGTGGAACAACAG

CCCTATTGGGGGCAACATTGGCCCTCACTCAGAGGGATCTTAAGAAGGGTTTAGCCTATTCTACTATGTC

TCAGCTGGGATATATGGTGTTAGCCTTGGGCATTGGTGCTTACCGATCTGCTTCGTCTCATCTTATCACA

CACGCTTATTCCAAAGCCTCATCATTTCTTGGATCTGGTTCAGTCATTCATTCGATGGAAAAAGTAGTTG

GATACTCTCCCATTAAGAGTTAGAATATGCTTCTCATGGGTGGTTTACGGAAGTGTATGCCAATTACCGG

AACTACTTCTTTTTTAGGTACTCTTTCTCTATGTGGTATACCGCCACTAGCCTGTTTTTGGTCTAAAGAT

GAAATTACTGCAGAGAGTTGGTTATATTCCTCTTACCTTGGATGGATAGCTTCCATCACAGCTGGTTTCA

CTGCGTCTTATATGTTTCGTATCTATCTCCTCACATTTGAGGGAGATTTTCGTGCCAATAATATTAGTCA

TAGCCATTTCGGTATTTCTCGTTTATCCGATAATAATATTAGTTTATGGGGGGAAACTAAAAAAGAATTA

TCCATTGAAAAAAATATTGACAATCCCTTATCCTCACAGAATGCAGAGCTTCCGGAAGCTGTTCCAGTTG

CATATTCTTATAAAAAGAATCTGACTCATGAAAAAGGAATTCAAACAGATTCCGATTTGTCCCACTCCCA

CAACTTATTAAATCCCGAAGAATCAGATTTTTCTATGGTATTACCTCTGATAGTGTTGGTAATGCCCACT

TTATTGGCTGGGTTGATAGGGGTCAATTTTATTCAAAAAGAAACTGGTCTTGATTCATTGTCCGAATGGT

TGATTCCCCTCATCGTTCCTATTAAGTCTAATAAAGCAAATTTGATAGAACTCTTGATAGATTCAATCGG

TTCGGTCAGTTTATCTTTCGTTGGAATATTCATTTCCTATGTAATGTATGGACCAATTTCTTTTTATCAA

ATAAAAATATACAAATATATTCGGGATATTAAAGTTCTAGATGAAAAGCTGTTGAGTTCGTTTGGACATT

TCATTCAAGGTTGGTCACTAAATCGCGGGTACATCGATTATTACTACAACGTCTACCTCATAAAAACTAC

AGTCTTTCTGAGTAAACTAGTCGTATTTTTTGACCAATGGGTAATCGATGGAATTATCAATGGGACTGGT

GCTTCTAGCCTTTTCGGTGGGGAGGGTGCAAGATACGGGGGAAGCGGTAGAATATCTTATTATTCATTTG

GATTAATTACTGGAATTATCCCACTAATATTACTAGCAGTTTTCGTTCTTCCAATTACTTGA

>ndhB

AGGAACAAACAAGCAAGAATCCGAAACGAAACTACACTACTGGTGGGTAATCTAAACAAATGATGAAGGA

TTCCTCGAGAAGTTAACAATTAGTACTCATATTGAATGATTATGAATTATTCAAGGAAAAATGGATTTGA

AACATACACGAGGAAGGTTCTAGGAGCAATACTAGTTAGAAATCTCTTATGAACCAGGAGCCGTGTGAAG

TAAGAATTTCATGCACGGTTCTGAATGAGCGGGAAGATCGAAAATCTTCTTTTCGACTCTAACTCTCCTA

CACCAGTCGTTGCTTTTTTTTCTGTTACCTCTAAAGTAGCAGCTCTAGCTTTATCTACACGACTCTTCGG

TATTATTTTCCCATATTTCTCCGGTGAATGGCATATCGCTTTAGGGGTATTAGCTACTCTTAGCATGATA

TTAGGCAATCTAATTGCCGTTACTCAAATAAGCATGAAACGTATGCTAGCATATTCTTCTATAAGCCAAA

TTGGATATATTATGATTGGAATACTTGCTGCAGACCCCGAGAATGGTTATGCAAGTATGATAACTTATAC

GTTCATTCATATACTCATGAATCTAGGAACTTTTGCTCGTATCACTTCATTTGGTTTACGAACCGGAACT

GATAATATTAGGGATTATGCGGGATTATACATGAAGGATCCTGTTCTAACATTCTCTCCAGCTCTACGTT

CACCATCCCTAGGGGGTATCCCTCCACCATCCGGTTTTTTTGGTAAACTCTATCTCTTTTGGCATGGATG

GAAAGCTGGTTCGTACCCATCAGTTCCGATAGCGCTCGTCACAAGTGTCATTTCTATATATTATTATCTA

AAAATAATTAAATTAATGTTCACTGGGAAGAATGAGAGGAGCGACACATCCACAATTTATATACAAAATT

CATTAGTTTCTTCATCAACTTCAATTTCGAAAAGTTCTATCGAAATAGCTATGATTATTTGTGCACTAGC

ATCAATCCTATCGGGTATATTAATAGATCCCATTATCGGGATCACACAGAATACCTTATTTTAGACTCAT

TTCAAGTTGTGACACGAAATTCCTTTTCAAATTTCAAATGATTTGTGTATTAAAAGCCGGTTCTATTGTC

CCAACTAGTCTGTTTCTGCAACTTATAATGAAATAATTATATCTTCTTCGGGAATTGATCCTGACATTCT

CCTATCTAGCTTGTATTTGTCTTTTCGCACCCAGAATCACTTGCTAGGAAAATGATCACTCGTCTATTCC

GGAGGAGATATAAGTATTTCCGCACGATGCACAATTGGGGTTGTGCAGTAACAACCCCTGCTACTACATT

TAAGTATCTAGGCGAAAAAAAAATGCCCTTCTTTTTTGTTTCTTCCTATGGTATCATTATTCTGATAATG

AAGAAAAGATGTGCTCGCGAGAGAGACGTGGGCTTGTTAGATCGTGATAAAATTCTCTGTAAGAAGGGAG

AATTGATCACCCCTTTAGGGATGATTGATTGTGGGCGAGGAGGCAGTCGAACCCTCGACCATCCCAGTAT

CTAAGGGATACCTTACCACCCTACGAAGAAACGATGAGTAATTAAAAAGGTCCGGGGGCTTTCCTTAAAC

CTGAATGAAGTCTTATATTTGATAAGTTTGGGAAAGAAAAAAGGAAAATTCAGTTCAGCACGGTTGACAA

GCATATATATATATCTGTAGAATTGAAATGGTGAACGTAACTCTACTATGTTCTCCTGCCTCGAGAGAAA

GGTAAGCACACTAGACTCAAAATATAGTCCTGCAGAGGACGGGGGTTCGAATCCTCCGCGAGGCTTCCAG

AGTTCATTTCTGGAAGAAGTCGAAAGACTTCTTGTTTTCACCAATAGGATCCGAAATCCCTATTCGGGCG

ATTTCTATGCTTGTCCTCTCGAGTCAAAGGAGCACTGTAAATTTTCCTTTGATTCGAGAGATGAGCGGGT

CCTATTGGTGTCTCCCAAACTATCAAGAGGAATAAAAATCCTTGAAGAATTCTAGCCTCTCTAGTATCCA

ATCTGGAAAATTGGATTCCAAATCCTTGGATTGTTGACTATTGAGACTAGAATTCCTCGTTGTTGGGAAA

GAAAAAAGGAAAATTCAGTTCAGCACGGTTGACAAGCATATATATATATCTGTAGAATTGAAATGGTGAA

CGTAACTCTACTAGGTTCTCCTGCCTCGAGAGTTGGAGGTTCAAAGATAGGTAGTAAGTCTTCGAATAAG

AAGAAACCGTTTTTTATCCTCTCTCTTCCCTAACTAAGGCTGGGACGGCAAATCCTCAGATCCGAAGATA

TTGGAGCGAGACTCAAAACCCTAGTAATAGTCTTACAAACAAAAGAGATACTAAAAGAGTGGCTGAGGTA

TGAACGTGAGTGGTATAAGAAAAGATGAACGTGAGATGGGACTAAAAATCCTAGTAGTTAGAGCTTTATC

CAGGGGGTGGGACTGAAAATCAAAATCCTAGTAGTTAGAGCTTTATCCAGGGGGTGGGACTGAAAATCAA

AATCCTAGTAGTTAGAGCTTTATCCAGGGTATAGAACTAAAAATCCTAGTAGTTAGGGCTTTATCCAGGG

TATAGGACTAAAAATCCTATAGGACTAAAAATCCTAGTAGTTAGGGCTTTATCCAGGGTATAGAACTAAA

AATCCTAGTAGTTAGAGCTTTATCCAGGGTATAGAACTAAAAATTCTATAGGACTAAAAATCCTAGTAGT

TAGGGCTTTATCCAGGGTATAGGACTAAAAATCCTATAGGACTAAAAATCCTAGTAGTTAGGGCTTTATC

CAGGGTATAGGACTAAAAATCCTATAGGACTAAAAATCCTAGTAGTTAGAGCTTTATCCAGGGTATAGAA

CTAAAAATCCTAGTAGTTAGAGCTTTATCTGGGTATAGGACTAAAAATCCTATAGGACTAAAAATCCTAG

TAGTTATAGCTTTATCTGGGGATAGGACTAAAAATCCTATCCCTCTTCTTTTGGAAATGAAGAAAGTGAA

GGACTCAAAATCCTATCCCTCTATCAAGTATCTGGTTAGAAGTATCTAACCAGTCTAATTTTTAGAATGA

ATGTAAATAATTCATATAATCTAATTTTTAGAATGAATGTAAATAATTCATATAAATTAAATAGATGAAT

AGAATGCTCCTATCTCTTCTTTCTATTCTCGCCAATCACTGAGAATTTGAATCGAGGATCAAGCTCTACT

CGGCTTTGGTCTACGCTCGAAATTACATGCCGACTCCCATACATTTAGGGATGATTGATTGTGGGCGAGG

AGGGATTCGAACCCCCGACAACGTGGTTCGTAGCCACGCGCTCTAATCCCCTGAGCTACAGGCCCCGCCT

CCACTGGATCCGTTCCAGGAACCACTTTTCTGAAATAGACTGGAATAGAACCAACTTTTTATCTCTCCAT

CTATTACGGGTTGGTGAAGATGCGTAAGCTTAGGATTCTCCCTCAGAGAAAAGAAAGGTAGGGCACTTTC

CTCTCACTAAAAGAGGAAAGGAAGGATTTGCTAGATGGGGTTCTCGATAGAGACGACCGTTACGAGAATA

AACGGCATTCAGCCTTTTTTTTTTTTTATCTAGTTTATTTCATCCTGGCGTCGAGCTATTTTTCCGCAGA

GCCCCCCCTGCAGTATCGTTACCGCGGTAGAGTTTCACCACCAAGTTCGAGATGGATCGGTGTGGTTCCT

CCACGCCTGAGACACCAGAATATCAACCCGTGAACGAGGAGTAGCATAGAATGGGGAAGAATTGATTAGT

TCTTACTAGGCTACGACTCCAGTCCGGAAGGCACACCAAAGGGAAAGGTGCACCTTCCAGGTAGAGAACA

ATCCCCTGACCCGCTTCTCCGTCCATCCCTTGGATCGACAGAGAAGCGGGACGGAACTCTTTCTTAGATT

CTTAGATCAGTTTCGAGGCTGATACTGTCAGACAATTGAATAATAGGTGGCATTGCCTGATCAAATTGAT

CAGGTTCTGCAGGAACAAAGTTCAAACCTCTCGGTCTGTTAGGATGCCTCAGCTGCATACATTACTGCAC

CTCCACTTGGCACCTATCGTGGTGATAAACGGCTCGTCTTGCCGTGACCTTATCTCGGGTTCTCAAATCA

GAGACATCGGTCGTTTCACGCTTCGCGGGGACGAAGAATCCGTCGTTGCCCCGGCTTTTTCTGTGTCTAG

AGTCTCCCAAGTAAGTACGAGTAGGAGAGCACTCATCCTGGGGTGGGCTTCCTACTTAGATGCTTTCAGC

AGTTATCCGCTCCGCACTTGGCTACCCAGCGTTTACCGTGGGCACGATAACTGGTACACCAGAGGTGCGT

CCTTCCCGGTCCTCTCGTACTAGGGAAAGGTCCCCTCAATGCTCTAACGCCCGCACCGGATATGGACCGA

ACTGTCTCACGACGTTCTGAACCCAGCTCACGTACCGCTTTAATGGGCGAACAGCCCAACCCTTGGGACG

TACTACCGCCCCAGGTGGCGAAGAGCCGACATCGAGGTGCCAAACCTTCCCGTCGATGTGAACTCTTGGG

GAAGATCAGCCTGTTATCCCTAGAGTAACTTTTATCCGTTGAGCGACGGCCCTTCCACTCGGCACCGTCG

GATCACTAAGGCCGACTTTCGTCCCTGCTCGACTGGTAGGTCTTGCAGTCAAGCTCCCTTCTGCCTTTGC

ACTCGAAGGCTGATTTCCGTCCAGCCTGAGGAAACCTTTGCACGCCTCCGTTACCCTTTAGGAGGCCTAC

GCCCCATAGAAACTGTCTACCTGGGACTGTTCCTTGGCCCGTAATTCTTGACACAAGGTTAGAATTCTAG

CTCTTCTAGAGTGGTATCTCACTGATGGCTCAGGCCCCCCCGGAAAGGAACCCTCTTTGCCTTCCACCTA

AGCTGCGCAAGAAGAGCCCGAAGCCAATCCCAGGGAACAGTGAAGCTTCATAGGGTCTTTCTGTCCAGGT

GCGGGTAGTCCGCATCTTCACAGACATGTCTATTTCACCGAGTCTTTCTCCGAGACAGTGCCCAGATCGT

TACGCCTTTCGTGCGGGTCGGAACTTACCCGACAAGGAATTTCGCTACCTTAGGACCGTTATAGTTACGG

CCGCCGTTCACCGGGGCTTCGGTCGCCGGCTTACCCGTCATCAGGTCACCGACTCCCTTAACCTTCCGGC

ACTGGGCAGGCGTCAGCCCCCATACATGGTCTTACGACTTTGCGGAGACCTGTGTTTTTGGTAAACAGTC

GCCTGGGCCTGGTCACTGCGACCTCCTTTGTGAGGAGGCACCCCTTCTCCCGAAGTTACGGGGCCATTTT

GCCGAGTTCCTTAGAGAAAGTTGTCTCGCGCCCCTAGGTATTCTCTACCTACCCACCTGTGTCGGTTTCG

GGTACAGGTACCCACTTGTCAAAGGTCGTTCGAGCTTTTCTTGGGAGTGTGGCGTGGGTTACTTCGGCGC

CGTAGCGCCTAGTGCTCGGACGTTGGCTCGAGGCATTTTCTCTACCCCTTATTACCCTTGATGGGTCTAT

TAACTTTGCGTCCTTAAACCGATAACCATCCTTCGGCTAACCTAGCCTCCTCCGTCCCTCGGGACCAACA

AGGGGCAGTACAGGAATATTAACCCGTTGTCCATCGACTACGCCTTTCGGCCTGATCTTAGGCCCTGACT

CACCCTCCGTGGACGAACCTTGCGGAGGAACCCTTAGGTTTTCGGGGCATTGGATTCTCACCAATGTTTG

CGTTACTCAAGCCGACATTCTCGCTTCCGCTTTGTCCACACCTGCTTACACTGGTGCTTCTACCTGGGAC

GGAACGCTCCCCTACCGATGTGTCTTGACATCCCACAGCTTCGGCAGACCGCTTAGTCCCGTTCATCTTC

GGCGCAAGAGCGCTTGATCAGTGAGCTATTACGCACTCTTTCAAGGGTGGCTGCTTCTAGGCAAACCTCC

TGGCTGTCTTTGCACTCTTACCTCCTTTACCACTGAGCGGCCATTTAGGGGCCTTAGCTGGTGATCTGGG

CTGTTCCCCTCTCGACGATGAAGCTTATCCCCCATCGTCTCACTGGTTGACCCTTTTTCCCTCCGCATTT

GGAGGTCACATCTAGTATTCAGAGTTTGCCTCGATTTGGTACCGCTCTCGCAGCCCGCACCGGAACAGTG

CTTTACCCCTAGATAGTCTAGTCAACTGCTGCGCCTCAACGCATTTCGGGGAGAACCAGCTAGCTCTGGG

TTCGAGTGGCATTTCACCCCTAACCACAACTCATCCGCTGATTTTTCAACATCAGTCGGTTCGGACCTCC

ACTTAGCTTCACCCAAGCTTCATCCTGGTCATGGATAGATCACCCAGGTTCGGGTTTATAAACAGTGACA

ATTGCCCCAGCAAGACTCGCTTTCGCTACGGCTCCGGGGGGTCTCCCCTTAACCGGGCCACTGCCTATAA

GTCGCCGGCTCATTCTTCAACAGGCACGCGGTCAGAGATCCGATTCTCCTCCCACTGCTTGGGAGCTCAC

GGTTTCATGTTCTATTTCACTCCCCGATGGGGGTTCTTTTCACCTTTCCCTCACGGTACTGCTTCGCTAT

CGGTCACTCAGGAGTATTTAGCCTTGCAAGGTGGTCCTTGCTGATTCACACGGGATTTCGCGTGCCCCAT

GCTACTCGGGTTGGAGCGTAAGCCAGCCGTACTTCCGGCTACTGGACTCTCACCATCTGGGGTGCAGTAC

TCAACTGCTTCGCCTAGCAAAACAAAGCCCTCATCGCTCTCCCACAACCCCGTTTTCACGGTTTAGGCTA

TTCCCATTTCACTCGCCGTTACTGGGGGAATCGCTTTTGCTTTCTCTTCCTCTGGCTACTAAGATGTTTC

AGTTCGCCGGGTTGTCTCTTGTCTGCCTATGAATTCAGCAGGCAGTTCAGAAGGTTAACCTATTCGGGAA

TCTCCGGATCTATGCCTATTTTCAGCTCCCCGAAGCATTTCGTCGTTTACCACGCCCTTCTTCGTCTCTG

GGTGCCTAGGTATCCACCGTAAGCCCTTTCTCGTTTGAACCTCGTCGTTGAATGCTACACCACCCACTTC

AAGGTGCTACTACATACGGAGATCTTATCAACGTCCATAGGGAATGGATCATGGGTCAACCTGCCCCGCC

CACTGGGGATCAAGATTCTTCCATACTAGTGTGTGCGATTCCATTGACTCGGATCACAGGCTGGAGATAA

GCGGACTCGAACCGCTGGCATCCGCCACAGGGTAAGCTACCGTCTCTCAGGCCTACTTGAATGATTCTAC

CACGGAGGCCGGCGATAGACAATGACTCCCCTCCGAACACGGCCTACAACTTTCATTGTACCGTGCTCTC

CGAGGGAGCAACTATCCCCGAATCGAGAGGCGCCGAATAGAGATCCCATTTAAGGGTTCTTCCAGCTAGA

TACTCCCGATCTGCCAGAGAACCAAAAAAGACTCTTGCCCTTTCCCTCTTTTGCTCGACTCTTTTTCAGT

CTCAATGCTGAGTAGTTGCCCTTCTCCGACCCTTCCCACCAACGGAAGCAGACAGCTTGTTCTACTTCTT

GGAACTGGTTATATGGTCGGTCTGTGACCCCCGGATGCCTTGCCTTCAGCACCCCTGGGGCGATCTCGTA

GTTCCTACGGGATGGGGGCGATGGGGTCGGTCCATGGATCTTGATTCCTTCCGCTACATTGTGCCCAGGG

AGTTGAAGAGAGATAGTCCATCAGGCTGTTTGCAAGGGCCAGCTCGATTCTCTTCCCCAGGGATCCGAAT

GAGGTAGCCCCGGGAGAGCCGCCGACTCCAACTATCGTCCATGTACGATCCGTAATGGATCTAACCAACA

ACCCATCCTACCCCGCCCTACACGACAGCTCATCTTTGTCCCAGTAGAGTCTCTCAGTGGCATGTTTTGG

TCCTCCCCCCTATTTTTGGGAAGAGTTAGCCACCAGTTCAGGTGGGAGATACTATCATTACCGCCTAAAC

AATTAGGCACCCAACCCGTAAGCGCAACGACCCACTTGCAAGGGCGGCGCTCTACCAACTGAGCTATATC

CCCTGTGCTCGGGCCAAGTAAAAAGTAAAGCATACGTGAACTGATCAGATGCTTCTCCTGATTCCCCTTG

GCGCAGCTGGGCCATCCTGGACTTGAACCAGAGACCTCGCCCGTGAAGTGAATAATCGCACCTATACTAT

TCTTATTATTATCTCATCAGAATGGAGAATTAATAGATTCTTTCTTAGAAGCGACTCATCCTTCCCGAAC

GCAGCATACAACTCTCTGTCGTACTGCGCTCTCCAAGTGTGCTTGTTCCCCCATCCCCTCCTTCCTTGTT

AACGGCGAGTTTCTGGAAAGATACTTCGACGGAAGAGAGAGAAAGGCGTCGAGAGACCCTCGACGCTCAA

CCCTGTACACTCTAGGATCCTTCTTCGAACCTGCTCCCCCTATCATTGAAGGATGAACAAAGACATCTCG

TTACATAGAATTGTAAGCTATTTGGAATACCCGATTAGTCGGTTGGGTGGAATACTGGGGAGTTTCTTCC

ATCAGGCATTCTTCCTATGTCTAGGTCCAATATCCTCGCCTCTCCGAGGGGTCTTTCTAGGACTACCCGT

ATAAGTTCTTCCATCGATTGCTGCTTCTATGGACCTTCAAGGGAAGCAGAAAAGGCTCGTATAGTATGAT

CCCTCCGTCACCCTAGAATGAGAAGGGTGATCCCGTAGTTCCTGGTCCGTGAATATGCGTTATCAGGTGC

TCCGTCTTTCACATCTAGCCTGAAGTTTATCAGCTTGTGCTCGAGAGATAGCCATCCATACACTGATAAG

GAATGTATAGATTCTCGAAAAGGGGGATCTGTTAGCGGTATCGGTCCTCCCCGGATCGCCCGAATCCCAC

TAGTGAATGGGGGGTTGAATCTCCATTAGATCTCACCTGAATCGCCTCATCTATCTCTTCCTGAAGAGTA

GTTTGGTCCTGAGACCGAGTCTAGTCAAGAATGGAAGGAGTACGCCATGCTAACGTTCCTTGGATGATAC

ACATCTTCGGGTCAGGCGCCGATGGGCACATTAGACTACCCGTGTGTATAAAAACCTTCACAGCCCAGGC

GCAACGGCGCAATTATCAGGGGCGCGCTCTACCGCTGAGCTAATAGCCCGTCATGCGGGCCTCCCTAACC

TAATATGATAGGGGGAGGCCTGCAACACTGAAAGCGGGGGAACCCCCATCCCATATCCGTCCCTCGTACT

TTCCCGAGGAAGTATGGGATTACTCTCAGCCTGTTCCGACCTGAGAGAATAAGCTCATGGACTTGGTCCT

ATTTCACCGCAAAAACAGAATCCCATCTGTTAGATGTGTGGATTTTCTCGTTTCGAGGTTTGGAACGGTG

CGTATAAGACCCGAGTGCCAAAGAGGCGTTAACTCTCCCTGAAAAGGAGGTGATCCAGCCGCACCTTCCG

GTACGGCTACCTTGTTACGACTTCACTCCAGTCACTAGCCCTGCCTTAGGCATCCCCCTCCTTGCGGTTA

AGCTAACGACTTCGGGCATGGCCAGCTCCCATAGTGTGACGGGCGGTGTGTACAAGGCCCGGGAACGGAT

TCACCGCCGTATGGCTGACCGGCGATTACTAGCGATTCCGGCTTCATGCAGGCGAGTTGCAGCCTGCAAT

CCGAACTGAGACCGAGTTTCTGAGGTTAGCTTGCCCTCGCGGGGTCGCGGCTCTTTGTCCCGGCCATTGT

AGCACGTGTGTCGCCCAGGGCGTAAGGGGCATGCTGACTTGACGTCATCCCCACCTTCCTCCGGCTTATC

ACCGGCAGTCTGTTTAGGGTTCCAAACTTAGTAGTGGCAACTAAACACGAGGGTTGCGCTCGTTGCGGGA

CTTAACCCAACACCTTACGGCACGAGCTGACGACAGCCATGCACCACCTGTGTCCGCGTTCCCGAAGGCA

CTCCTCTCTTTCAGGAGGATTCGCAGCATGTCAAGCCCTGGTAAGGTTCTTCGCGTTGCATCGAATTAAA

CCACATGCTCCACCGCTTGTGCGGGCCCCCGTCAATTCCTTTGAGTTTCATTCTTGCGAACGTACTCCCC

AGGCGGGATACTTAACGCGTTAGCTACAGCACTGCACGGGTCGATACGCACAGCGCTTAGTATCCATCGT

TTACGGCTAGGACTACTGGGGTATCTAATCCCATTCGCTCCCCTAGCTTTCGTCTCTCAGTGTCAGTGTC

GGCCCAGCAGAGTGCCTTCGCCTTTGGTGTTCTTTTCGATCTCTACGCATTTCACCGCTCCACCGAAAAT

TCCCTCTGCCCCTACCGTACTCTAGCTTAGTAGTTTCCACCGCCTGTCCAGGGTTGAGCCCTGGGATTTG

ACAGCGGACTTAAGGAGCCACCTACAGACGCTTTACGCCCAATCATTCCGGATAACGCTTGCATCCCCTG

TCTTACCGCGGCTGCTGGCACAGAGTTAGCCGATGCTTATTCCTCAGATACCGTCATTGCTTCTTCTCCG

AGAAAAGGAGTTTACGACCCGTGGGCCTTCTACCTCCACGCGGCATTGCTCCGTCAGGCTTTCGCCCATT

GCGGAAGATTCCCCACTGCTGCCTCCCGTAGGAGTCTGGGCCGTGTCTCAGTCCCAGTGTGGCTGATCAT

CCTCTCAGACCAGCTACTGATCGTCGCCTTGGTAAGCCACTGCCTCACCAACCAGCTAATCAGACGCAAG

CCCCTCCTCGGGCGGATCCCTCCCTTTCGCTCCTCAGCCTATGGGGTATTAGCAACCGTTTCCAGCTGTT

GTCCCCCTCCCAAGGGCAGGTTCTTACGCGTTACTCACCCGTCCGCCACTGGAAACACCATGAGGATGCT

TCCCGTCCGACTTGCATGTGTTAGGCATGCCGCCAGCGTTCATCCTGAGCCAGGATCAAACTCTCCATGA

GATTCGTAGTTGCGTCACTTATAGCTTCTTTCTACATAGATGAAGCTGATTCGAAATTGCCATAGATGAA

GCTGATTGAGAATAGTCTCCTATCTCCAGGCACAACTTGGGTTTCTTCATTTCGTATTAGCTTGAAGCTC

ACCCATAGTGTATCCGCTCCTACCGCTTTATGTCAATCCCACAAGCCTCTTACCCCCCCCCCCATCGAGG

GAGACGGGAATAGAAACGTTTGGGTTAAGTTTAAAGAAATCAGGCTCGAACTGATGACTCACACCATTCT

ACTCTACCACTGGGTTCCCTATCTTGCTATTCCTACATCAAATGATCACTCACCCGCGGTGGAATTAAGA

ATTAACCAACTCGGATGGTCGAGAAACTGGATTAGACTATCCTGATGCGGCTGATTAATCTGGAGCTAGA

ATTTATTTCTCTCCACGTTATTTGTTGAAAGAAGCGAACGAGTGAGTGAGGGATTCGAGATGCTCTTTCC

TTATTTCTTTATAAAAGAAAAGCCCCATCGAAAATAGGGATTCTCATTGATTCAGAGCGTGGGATATGGC

TTTACAAAATCCGTTACCTTATTATTCAATCCAATTTTGGCAAGTTATGCTCCGGTGAGATGTTTTCTCA

GTCCTAGGATGCACCTGTGAGATCGATATAGAAAACCCAGCGTAGTTGGAGGGAGAGGAACAAACAGAAG

CAGATACGGATGATAAACAGAGCTCTTTCTTTCTTTTCTATTCAAAATATTTTCTATAGGTCCCATGCCA

TAGGGATATGAAAGAGGGAGGTGAGAGTTTACCCAGTGTGCTTGGCCTATTTATTAACCCCACTCGGAAA

GAAACTGAAAGACAGTCTCGAACTGGCAAGTCCCCAATTTCGATTTAAAAGATTTCTCACAGACATGCTT

CAAAAGAGTTGGGGCTACCTCTACCCAACATCTTTGTAACCCTATACAGTCTCTAACTATACTATACTAG

ATTGGTACATTGGCATCCTACCGGGACTGGCTATGCAACTGATATTACTAAACCCGTCTAAAATCGGCAT

TACTAACTTTCTTTTTACTACACTTTCGTTCCTCTTTCCCTATTCATAATCTTTATGATGAAATACTCGT

CCTCGCCATTCATCTGAATTAACCTTGGAGTACACAACATTAGAAAAATCTGTGTCATGCATTGGTAGTA

ACAATTGGTAGTAATAACAGCTTGACCTCCTCGAGCTCTCGTGGTACAATTTTCTTTCCACATAACCTGG

ACTTCTGATCCGGTCCACGGAAGAGGGAGGAAATAGGATGCAGGACTTGACTTAGTCGCTCGTCACGGAA

CAAGCTAACTAAGCCAGAATCAGCGAGACAAGTAACCTCTTTTCTTTTTCATATATATCCTCGGTTTCCT

TTCTCACTGCTACTTCAGCATCATCGCTACTAGCGGGCCTCAAGCAGTCATCGGATCCTATCCCATTAAA

GATACGTATCCTTACTCACTTACTTATTAGGTAGTTAGGTAGGTTACCGAATCCTTCTCAGGCAGCCTCG

TTGGAACGAAAGAAAGAACGAAAGTCAGATATCGAAGCTGTCTTCATTTCAGAATGGATTCCTTATCGAA

GGGTAATTAATGATATGGATAAGCCTATACCAACTCGTCAATCTCCTCTATATTTGATCCGTTTCATATT

ACTCACATGAAAACAAAAAAATTCATTAGCGAATCTACTCATCAATTTGATGGATTTTTCATTTATCTAT

CCGTGCTACTTATTAATAATACTGAGATTCGGAAAATGAGGGGGGCATAAAAGCAACGATTTGAAAATGA

ATTAAAAAGAATCTAATTTTTTTTTTTGTAAATTCTTTTGTAGCTGAGAACAGCTGAAAAGAATCTTGTA

CTCCTTTTCTTAAGAGTAATTGAATGACGAGGAGCCGTATGAGATGGGAATCTCATGTACGGTTCTGTAT

AGTGACATTGAAACTGACTCATCTGTCAACTATTCCACAACTACACCAAAAAAACCTAACTCTGCCCTAC

GTAAAGTCGCCAGAGTTCGATTAACCTCCAAGTTCGAGGTAACGGCTTATATACCAGGTATTGGCCATAA

TTCGCAGGAACATTCGGTGGTCCTTGTGAGAGGCGGAAGGGTTAAAGACCTACCCGGTGTGAGGTATCAT

ATCGTTAGAGGAACCTTAGATGCTGTAGGAGTAAAGGATCGTAAGAAAGGGCGTTCTAGTGCGTTGCAGA

ACATTGTCGCAACTTGTATCATCGCAATGATTCCGTATCAGTTGTTCTGATATGTTAAACGTGTAGCCGA

CCCAGCATTGCCAGGGGACTGAAGCCTGCTATTACAAAGATTGATTATTATCCATCTATTTGTGTGAAAC

AACTTGGTGTCTAAGGTATTACATTCCAGTAAGTTGAGTTTTACCTGGACTCCTACCTAGAAAATCTTAG

AATGTCTCTTCCTCTTGGAGCGGGTTCAGACTACTATTATGGAGATTCGGTGAAGATTTTGTGAACATTC

GGTAATTGGATCAATAAACCCACGGACATTCTTAGTGAGATAACTGAAATGCAAGATTTTCTTTTTCCAT

TCCTAAACTTTGACTTTATTCTATTCCTAGAATAATGAAGAGGAAACGGATACTCAATGCATAATGAGTA

AATATGATTCACTAAAAGTGGTTCAAAATCACTTCAATAGTTTCTATTCAATCATATGGAAAGCTGTATT

CGATGAAAGTCGTACGTGCAGTTCGGAGGGAGATCTTCGACTAACCGGCGGATCCACCCTACAATATGGA

GTGAAGAAGCCAAAATAATATTCTAAGATACCATTGGGATAAAAGAATTGATTGAAATCTGACATATCTG

CAAACTCATGTTACATCGGAGCAGTGTAGCGAACAGAAAGAGAAATATAGAATCGGATCCGATTTATCGT

AATCGATTAGTAAACATGCTGGTTGATCGTATTCTTAAGAATGGAAAAAAATCATTAGCTTATCAGATTC

CTTATCGGGCTATGAAGCGGATTAGATAAAAGACAAATAGGAATCCACTGTCTGTTCTACGACAAGCAGT

ACGTGGGGTAACTCCCGATGTAGTAACAGAATCCAAACGTGTAGGTGGATCGACTTATCGAGTTCCCGTT

GAAGTGGTACCTGCAGAAGGAAAAGCTTTGGCTATCCGATGGTTATTGATCGCGTGTCGAAAACGTTCAG

GTCGAAGTATGGCTTTAAGATCGAGTGATGAATCAATGGATGCTGCCAGAAATTCTGGTAGTGCCGTACG

GAAGAAAGAGGAGACCCATAAAGTGGCGGAAGCTAACAAAGCTTTTGCCCATTTCCGTTAGTTTCAGATT

TGTTTCAATCCACAATCTTTTCATTGTGGATTGGAACCAGGGCGCGGGTTATCGGGAATCAGAATACGCC

ATAAACAAATGGATAAGTAAAAATTGGACGATGAATAAGAGATATCTAAGCCATAAGTGAGGATTGATAA

TTATTTACTAGATTATTAATTATTAGACTCTTTATCTTATAGAAGGGAAAGAAACTAATGTGGAGTTGGA

AAGTCCATCGGGGAAAGGCTTGATGCAATATCGATTAGTTATTCGGAGAACTGAAATCGATTGGGACGCA

CATAGAGGAAGCTGTATGATCTGAAAGATCACTACAATTTGAGAAGCTTCTCCCAGTTCCAAACCTGGAA

TGAGACTCCGACACTTCACTTGAATCCGCCGAGTTTTAAGTTCAAGCCACAGAAGAGATTCGATCAAAAT

CGACTTTCCCTTTCTTACTCACCATTTTTACCTTACTTGCTACAACCCTCCAACTACTTTAGAGAGATTT

CATCTAATAAAAACTATTGTATCAGAGACAGAATGTTGTACTCCCATTCGTCGAAATGGAACGTTGCTTC

ATATTCATAGGGTGATCGATAATCAATATCGTTCAATTCTCAATGGATGATCAATGAAGAGTTAGTCTCC

CTCCTTCCCACGAGACATAGAGGAAAAACCAAAAAGTCTTTATTCTAAAAAAGGGAAGCCGCGTTGTGAA

ATAAGGGATAGGACATATTCAAGATACCGAAAAATAGCCTCTATATCTAATAGTTTCGGATACTCAATCA

ATCTTAGTTGACACGGATAGAATTTCGTGATATACTGGGAATCAACAAGCTTACTAGCCTGGGGAATCAC

TAATTATTTTGAAAACCAAATATTACCATGACCGCAACTTTAGAAAGACGCGAAAGCGCAAGCCTATGGG

GTCGCTTCTGCGACTGGATCACCAGCACTGAAAACCGTCTTTACATCGGATGGTTCGGTGTCTTAATGAT

TCCTACCCTACTAACCGCAACCTCTGTATTCATCATTGCTTTCGTCGCAGCTCCTCCTGTAGATATTGAT

GGTATTCGTGAGCCCGTTTCTGGTTCTTTGTTATACGGGAACAACATTATCTCTGGTGCTATCATTCCTA

CTTCTGCAGCTATCGGGTTACACTTCTACCCAATTTGGGAAGCAGCTTCCGTTGATGAATGGCTATACAA

TGGTGGTCCTTACGAAATGATCGTTCTTCACTTCCTACTTGGTGTAGCTTGCTACATGGGTCGCGAGTGG

GAACTAAGCTTCCGTTTGGGTATGCGTCCTTGGATTGCTGTTGCGTACTCAGCTCCCGTCGCAGCTGCTG

CCGCCGTCTTCTTGATCTACCCAATTGGTCAAGGAAGTTTTTCTGACGGTATGCCTCTAGGCATTTCTGG

TACTTTCAATTTTATGATCGTTTTCCAGGCTGAGCATAACATCCTTATGCATCCTTTTCACATGTTGGGT

GTAGCTGGCGTATTCGGCGGCTCTCTATTCAGTGCTATGCATGGTTCTTTGGTAACTTCTAGTTTGATCA

GAGAAACTACTGAGAATGAGTCTGCTAATGCAGGTTATAAGTTCGGCCAAGAGGAAGAAACCTACAACAT

CGTAGCTGCTCACGGTTATTTCGGCCGTTTGATCTTCCAATATGCTAGCTTCAACAATTCTCGTTCTCTA

CACTTCTTCTTAGCTGCTTGGCCCGTAGTAGGCATCTGGTTCACCGCTTTAGGTATCAGCACCATGGCAT

TCAACTTGAATGGTTTTAACTTCAACCAATCCGTGGTTGACAGCCAAGGTCGTGTTATTAACACTTGGGC

TGATATCATAAACCGCGCTAACCTGGGTATGGAAGTTATGCATGAACGTAACGCTCATAACTTCCCTCTA

GACTTAGCTTCTGTTGAAGCTCCTTCTATAAACGGATAATATCTGTCTGGTTATGCAGTATAACTGGATA

CCAAACCTTTTAGTTTTAAAAGGTTTGGTGTCCGTTTGTTCGATAAAACGAATAGAAAGAATGGTAATGG

TTTGTCAGAATCTTACAATCATAAGTTCCCAATCTTGAATTCTGAAGAATCCTTAGAATACTCTTATGCG

GCTGTAAATATTAAAAATATTTCTATTCCAATTCACAGAATGCTTGTAATCTACCAATGAATAGAGTGGG

AGTACGTTCTTCATTTCACAGATTTTCTATTGTCTCGTTATATACACAACTAATATGTATGTGTATCAAT

CGAAGGACCCTAATAGCTTAATAGATAGATCCTGTTCCCTTTCACGTTCAGGGAGCCAAGTAGTAGAGGG

GGCGGACGTAGCCAAGTGGATCAAGGCAATGGATTGTGGATCCATCACGCGCGGGTTCAATCCCCGTCGT

TCGCCCATCCAATTAGATAACTCGTTCTTATTGCTTGGAATAGATAAATTTTTGAAAAAAAAAAAAGTGG

ATAGGGTAAGTACAGGTATCCTCAACAATAACGATTTGAAATTCCCGATCCAATTCCAGTTTTGGACACG

AATATGTATAGAAATCACTATACTTATTTGAAGTACTTACTCCATCGTATCTTGAATCTTTCAAGATTAT

CCATATAATAAATGTGAGAAATAGATAGTATCTATCACATATGAATAAGATGAAAAAAGAAAATAAGGTA

GAAAGGGTGGGAAAAAAAAGAGTAGGAAGTCCATATTCTCTATCTAAAGTTCCGGGGTTAGTAGAAATCA

GTAGATTAGACTACTTCTTCGAATCATTGAAGAACCAACATCTCAAAGAATTTTTAATTGGTCCATTGTC

TAGTTATGAACCTTTTATCAGATTATTTGACTTATGGATTCTAAGTTCACTATTTCTACGCAATCTGCGT

CATTCAGTAAAGAGGGGTAGTAGCATCACCTTGGAAATCCTAATGTTACTAACAATACCAATTTCTATGC

ATTGCTTAAGTGATAGAAGTTCGATCGAAAGAAGTTCTATATTAGCGAAAATAATTAATGGGGGTGGTGG

AGTAAGAAAAGAACAAGCAGAAAATTCTGGTGACTTATCCTACTACTTTCTTCAATCCAAAAGATCTTTA

TCTGTTGAAAAGGATGGGAAGAGAAGAACACCTGATTCTTACTATTTAGGTTCGAACGAAGATATTTCCA

CAGGTTCGACGAGAGAAGAAAAGCAAGTTCGTTATGGTGCAATGAATCCTCTGGTTTCAGGTAGATGGAA

GGTCTGCATAGTGAGGGATTCACTCCCTGGCGAGGACATATCCAGAGATGAGACTGAGAGGATTCAGATA

TTATGGAGGGATAGGTTTTTCAAATTCTATAAACATGTGGGACTTTATCAAAATAAAATTAAAAGTGACT

GTTACCAAAATGATTCTGATTCGTTATTCTCCTGAAAAATCCATAACAAGCAAGATCTGGATCGACTACA

AACAACAAGATTGAGGGAGGCCTTTTCCTATTTGTCTTCATTTCCATCTTGTAAAAATACAATGTCGTCT

CGTGATGGTATATCCGGGTTAGATTGTCACGAAAATGGGGGAGACTCTCCTATTCTACACACTTATTCAC

AAATAAGAAATGAATTAATAAATGGACTCACTGGATTTATTTTGATAATTGAGGAATCGAATCCGATTTC

TAATGGGGCAATAATTATTGATATTAATAGTAATGAGAAATCTGGGAAAGGATTTCCATTGAAAATGACA

AAGAATCTATCATTTACTAGGATATTTGGCAAGAAACTAGGGTTGCCGAGTAGCAAATACTTTGACCTCA

ATAAAATTCTTCCACGATATTTTAAAATATCTTTAGGTATACCTAGAGAAGTAACTAATAGAATTGAAAA

TACTACTTTTTTAAATGAATTGAAAGGAAAAGATAACATACATTCAATATATTCTCTAGTTAGGTTGTAT

GGACGAAATAGATTGATACCTCTCTACTCAACATACACACTTCTTTTATATGACTATTTCTGTGCATTAG

CTAGTGAATATTTCTTCCGAATCAAATATCGGTTGGATGGCTGGGCGGGGAGCGGGGAATCCACCGGTGT

AACAAGAATTGCAACTGAATAAAGATTATTGAAATGGAAAGATAACACAGAGCGTTTGTTGAACGAGTAT

ATTACCTTCCGAATCGATGAGTATAGGAATGTTCAGTCAAATGCGCCTAGATGGCTTGATACAACCAGAG

ATTCGTCTTTTTCCCCTTTCGGGAGAGTCTTTTTAGAAATAAAGTATGACTTGGATAAATCGATTTGCGG

TGTATCAATAATGAGAAACAAATTACTAAATAGTATTGGTACTAGTATTAATAACACCACTCAGAATAAC

GAGAAGTATCCTCATCGATTTCTCAATGTTTTATTTCTTTACAAAATGATTGTTACCGAGGTTACTCGCC

AAGAAGTTCTGATAGATACGATTGATTATTGCATCGAGAAATTGAACGATATAGATCTTTCGATGCTTGA

TCCCTTATCGGGTTTACTCGATATTGACATTGACGAACAGATATCTTTCCTCAAAAGAATTCTCGAGAGA

AAAAAGAGTTTATTCATTGAGTCCAGATTGTTAGTGGATAAAAAAGCGATAGGCTCTTCAATCTCACTAG

AACCCGCAGCGAATCCGCCTCTTGTTGGATTACCCCGCATCGAATCTATCCGAACAGGATTTTCAAGTGA

TGCTCTTTCCACTACGGGGAGGCAGAATTGGAATCTGTTTCTAGATAATTCAAGTCGTGGGAGAGGTTCA

AATAAAGATATTGGTGAGAGTATTTCAAGATACATTTCCGATGAAGTGAATACACTAAACTTTCTAGACC

ACTCTAATCTACCTGTATGGAACTATGCTAGAAGCAATTTCATTCCGAGAACCAAAAGGGATTTCCTTAT

TGGGAGATGTAGCAGTAGTTATTCCAACGTCTTAGAGAATTTCTATGTGGGCTCCGATAATGAAGTCATC

TCATCTAATATCATCTCATCTATTCAGTCTCAACTGTCGGATTCATTATCACCCAATTTATCGAAACGAA

CAGAAGGGGAAACTGTTGATCATGTACTCACAACAGTTCAACCTATTCTGTCTAATCTGCATGAATCTGC

AACATTATTATTAACTCATTCAGATAGACTTTTTAAGTCTATTTCAGATCTGAAAAGATTACTGTCGAAG

TTGAACTCATCTCCTCGTGAAACGAGAGATTCGTTTCTATCTTCGTGCAGTAGCGATGGATTTTATTTGG

AAATGGAAAAAACGTTGATAAACTCTAATCCATCGGCGGATCGGCGACCCCGACCTTGTCCTAAGAATCT

GGAATTGGATCAAGTCAATTCAGAGAAGTCTATTGAAGATAGATCAGACTCGGGGAATGTTTCCACCAAG

AATCGATTCTATCAAAATGATCCATCTATTGGGTATTTCTGGGAACCAGAAGAATTAGAAACGCTTTACT

GGTCGCTAAGATTCTCATTACGCAACGATGTAACATCAAGATCTCTAATAGGATTGATTGGGAAGAAGGT

TCCGCACGAAGATACGAAGTTTGCAGATCCATATATTCGTAAAGAGCCTATCCGTCCATCCCATTTCATC

AATTTCAATGAATTATCAAAAGATTTGAACAAATATAAGATCTCTTGGATCTTTTGGAAAGACAATATCT

GTGAAAAATGGAGCCTATTCAGAGAGTATATACCTTGGTTTTTTACCCCTAACCGGTGGAGATACTTCTA

CGATCCGATTAGAGAAACATATCCAGAAATAGTACTTAAAATAAGTGATGACTCGAATCATAATCTACCT

AGAATTTATAAAAGAATTGCTGAGGATATAGATGGTGCCAAAGCTTATTTATTCCAAAGCCTAGAATTGA

GATTCAAAACTGATTCCATCAATACCATATTATCCAGGATAGATCTTCTTCTTTTCAAAGAAATTACTAA

TGAAACGAAGATGTCACATTCAGGATGGTCAGTATCTCAATTTTCCAATAAGTCTATCTTATCTTACCTT

ATTCTCTCAATATTATTCGTTCTTGCATTCTCCAAGCACCATTTGTCTGCCGTTTCGGGTTCTAATTCCC

TTCATTCATGGAAACGTTTCGATACTATTGGATATTTAATAGACCCAATGCGTGGATCCTATTTGAAAAA

GGTAATGTATTCCCCTTCGACAAGGTAAATGTAAACGAAAGATCTACTAATCTATTCTTTGAAGAGATTC

TTGAATTATATAAATAATATAATCTTTTTCTCCTTCGTGAAAAATGAACTAGATTCATGGATACTTTGTA

GGGAAAGCTCCGATACCCTTAATAGTAAGAAAGAACTATTGACTCAATATTTAGTAACGAATAAAATTAT

TTCCAAGTATGAGTCGAAATTGAATTCCAATTCTGATTTATCGAGCAATGAGATTGATCATGAACCTTTC

CCACAAGAAAGATCTAATGTTTTGGCATACCTACTCCAATTCCGTCAAAATGATCTATTAAGTTACGAGA

TCCGTAAGTTGGATCCTGCGGAGAAGTGGGCTCTTTCCGCCCCCGAGAGAAATATTCTATTTTCAGCAAC

GACGAGACGAAGAGGCATTCTAAATATGCCATGTCATGACATACCTATCTCACTCTAATCAGGATTATTA

CCATCTAAAGGAATTCCGGTAGTAGGACCCACAGAAACTGGACGATCTTCCGTTATTAGGGATGTAGCAT

CCAATTCCTACTTCCCGTTGATGAGGCTACCACTAAGAAAGTTGCTATACAATCGATCATATTTCAATAA

TATACATGGAAATTTCATCTCGAAAGAGAGTGTACACCGATTAAATCTCATTTTTGCAATAGCGAGAGAG

GTGTCTCCCTGTACAATATGGATTCAAGATATTCATGAATTGAATGTTCATCGCTCGTATCATAGACTAG

AAGCTGATCCCAGATTCTTACTTTGCCCAATATTGAGGAGTATTGGTTATGGGCGCAGTAATTCTCGCAT

TCGTAAGAATATTGTTATTGCTTCGACTCATGTACCTGCAAGGGTAGATCCAGCTCCAATAGCTCCGAAC

CGGTTAAACTAATTGATAAATTTCCGAAAGTCCAACAGGTGTCAACGTCAGAAAGAATTGTCAATTCTCT

TACGTATCAAAGGCTTCAAAATAGAGGCTAATCCGCCTCTTCTTGAAGGTACTGGGTCTGGAACTACGGG

TTATAGCAAACGAGATTTATTCCTTTCTGCTAATGAAGCATTATTAATCGGTACTTCCAAAAGGAAAAAG

ATTGTATGTAGTGATGCAATTGGATTAGCGTCACATAGACAACATTCAATTGTTACTTATATGGGCAATG

GAATAGAATCCAGTTCTGAATACGAAATCTCTTCTCAGAGGATAGGAGAAGCTATTCTAAAAAATAGTTT

GATAGATACTTATCCCACAAATATTCTATTTATTGGTAGTAATGCGTCAAAGAGGCGATTTTATCATTTG

TCTAACTGGTATGTGGAACCTTCAATAACCGAGTCAACAATTAAGGAATTCACTCTATTTTCGCATATCC

TAGGGCTACTGGCTGGATTAGCGGCTCGCGATTCGTTCAAAATGGATATGAGAAAGAAAGAAAATTTCAT

TGTTATTGATAAACTTGTAGAGAATGACTTTAACCTAGCGTGTGGTGTTCTAGAAAACCTTTCAAAGGAT

TTTTCATGTTCAGAAATCTGTAGAAGCAGAAGTCAATCCAATAATAGTCTTTCTTTTCCTTCTCCTACTG

AACCCAGGTACTGTTCAGATATAACCTATACAAGTCGTTCTTCTAAATCTACGAGAAAAGGGGTGTTTAA

TCCTCTAACCGACTTCGAAATGAAACAGTCACCCGAAATAGACTTAATTCCGACGGAAGTATCGCGTGAG

ATTGCTTGGTCCCCTAAGGCTTGGCGTCTAAGTTTCATGCGAAGTGGTACTTATGAATCGATAAGAGTCT

TATCCGAATTCAATAATTTGTATAATCTAATCCTCCTTTACCAAAATCAGAATCAAATACCCCAACGGGA

TTTCGAATTGAATAAGATTAAGTATAGTGAAAATAGATCGTATGAGAAAAAAGGATATCTTTTCAGTTAT

AAGAGAGCTTTAGGTAGGTTGAGACAAAGATATATTAAAAGATTGGAAAACCGATTGGATAATATCTCGT

TACGTGAGCAATTTCTCGAATTGGGAATCTCCGACTCATCTAATCAATATGAAATACAATGTAATCGATC

CGATGAACCGACTCGATTCTTAGGGGGGCGCTTCATCTGGGACCCTATGCTTCTATTCCAGCCGGATCCT

AATATTCCCTCCTCGCGTCGTAGTTTATTAGCAAATCAAGAACTGGTGCGGAGGCTTTACGTAACTTACG

GTATGAGAAGGGAGCGCGAAAAACATTTCTCAAACGAAAAGATTAAAAATTTCTTTCTCTATCGTGGATA

TGATCCGAAATCGATAGCTGAATCATCTATTAAGCGGTGGAATAATTTTCCTTTGGATGAGGAGCGACAT

TCCGAATACGTCAAAGAAACTTAGTTTATGCATATACATCTGCAATATCCACAGATATTTGTTCCCATTC

ACTTGTATCAAAGCATTGTAGTAGAAGATTTGCAAGAGCGATTTATTCGTTTTAGGCTTCTGGTTCATAG

AAATAGATGGATGAGACGGAACCGTTCCCCATTTAAGGATTTTCTTATCTATAATATGTTGCTTGAAACT

TATTAATATCTATTCAATCCGTTCCAGTTTGGTGGGACGTCACTGGATCAAATAACGAAACAATTTCTTA

ATGAAAGTTCAATATCATATAAGAAAATCTTAGATACTATTCATTCAGTCTAGATCTCTAGCAATATAGA

GGTATTTAGAAGTCAAATCAGTAGAAGGAAGATCTATCTTTTCCTTTTACTGATACAATAAGATTCTGCT

TGTAGCATCTCAAATGATTAAGAATTTATAGATCATTTACTAGATGAGTCTTTCTACTTGAAAAAAAAAA

AAAAAAAAAAAAATTAAAAAGGAAGAATAATAATTTCTTCTATAGGGAGTATGGGAAGCGGTTTATAGGG

AAGCAACTTTTCAATATCCTGTTCGGAGTAGATCCTTGATAAAATTGTGGATTCACTCTCGAGGTGACTG

ATTGATTTGCTTATCCCAATCATTCAGTACACCGGAGTGGAGTAGGGATTCTCGAAAAAGCGACGCTTAA

ATAGGGTCCTTAGAAGCATTGAATTATCCAAAAGAGGGGAACGTTTTGGTTCTTTCATCAATTCTTGAAG

CTTGAAATAAACATGATAGTGAATCCTTCACTGGTTGATGGGTTATAGTGATTTGATTTGGCATATGGGT

GAAAGACAACTATCCTATCACTGGGAGTTTTTTATGTAGATAATGTAAATTTTTAAGGATATTATGAGAA

TGTACCTTCCCCTTTTTTAGCGTGAATCAAGGTCTTTTATTCGAAAGAAGCATCATCATCTCCATCATCT

CCATCATCTAAACCATCTTTCATTCCACCGGAAATAGATGAATCTCCCCGGGTAGGATTTGAACCTACGA

CCAATCGGTTAACAGCCGACCGCTCTACCGCTGAGCTACCGGGGAAAATGGTAGGGGATTTAGTCTCATA

CACATTTAAAGTAAAGACCCTTGTTCTTTGAGCCGCCTCTGAATCTGCAAGACGTTAAGCTTCCTCCGAC

ATTTCACAAACTTTGTGTACACCCTAACTCTTATTATAGGAAGAAGCGGCAGCGATAGCAATCCTATTTG

AATAGAGCCCCCGAATCATGGGGGGGGGGGGGGGCTGGTGCGGTTGATCTTGGCCATGATTGATTGCCCC

CCCCCATGATCTGTATCGATCAATCACCAATCAATAGTTTCTATTCTCCCCCTTCCTAGAAGCATAGTAG

AATAGCCACAGGATTCTTCTACCTCATAGAAGTAGAAGGAATATCTTTCAATAGTAATAGGGAGAATAAA

GAAAGGGAAAAGGAGAGAAATAGAGATGGGGAAGATGAGGAGCAGTCGGAAGAAATGAACACGAATTGGA

GCTTTGTGAAACGAAAGTGGCAGTTTATGGTAAAGGCGGGATTGGCAAGTCAACAACTAGCTGTAACATA

TCAATAGCTTTAGCCAGGCGGGGAAAACGAGTCTTACAAATTGGGTGTGATCCCAAACACGATAGCACCT

TCACTCTTACGGGATTTTTAATACCTACAATTATAGATACTTTGCAATCAAAGGATTATCATTATGAAGA

TGTATGGCCCGAAGATGTGATTCACAAAGGTTATGGTGGGGTAGACTGCGTGGAAGCTGGTGGACCACCC

GCGGGGGCTGGATGCGGTGGGTATGTCGTGGGAGAAACAGTAAAATTACTGAAAGAATTAAACGCTTCTT

ATGAGTATGATATCATTTTATTTGATGTTTTGGGGGACGTAGTCCGTGGGGGTTTTGCAGCTCCATCAAA

TTATGCAGATTATTGTATTATTATTACTGATAATGGATTCGACGCCCTTTTTGCAGCAAATTGCATCGCT

GCATCAGTTAGAGAAAAAGCGCATACCCATCCGTTGCGATTAGCTGGTTTGGTGGGTAACCGAACATCTG

AAAGGGACCTTATTGATAAATATGTAGAAGCTTGTCCCATGCCCGTACTAGAAGTATTACCCCTCATCGA

AGACATTCGAGTCTCGAGAGTGAAGGGAAAGACTTTGTTTGAAATGGCTGAATGCCAACCGAATCTCAAT

TATGTTTGTGACTTTCATTCAAATGTAGCAGATTAAACTTTGTCTAAACCGGAGGGAATTGTACCAAGAG

AAATTCCAGATAGAGAATTATTTAGTTTACTTTCTGATTTCTATCTAAACCCCAATTCTGAAAAGGGAAA

GGAAATTCAAAATAGTCAGCAGAATACTCCGCTGGATTTTACAATAATTTGACAACGAGATTGTCACGCC

TCTCTCTCTATATATACCCCTTTCCAAGGAAACGCTTTCATGAAGACTCTTGAAATTCCTACTTTTGAAT

GTGAAACTGGTAATCATCACACCTTTTGTCCTATTAGTCGTGTAGCTTGGTTATACCAAAAGATCGAAGA

TAGTTTTTTCTCAGTAGTAGGTACGAAGACTTGTGGTTACTTTTTGCAGAATGCTCCTGGAGTTACGATT

CTTGCGGAACCTCGTTACGCAACGGCGGAATCGGAAGAGGGGGATATTTCAGCTTAATTGAATGATCAAA

AAGAGTTGAAGAAAATCTGTTTCCAAATAAAAAAGGATAGGAATCCTAGTGTTATTATTTGGATTGGCAC

ACGTACTACAGAGATAATAAAGATGGATCTGGAAGGCATAGCGCCCAAGTTAGAACGCCAACTCGGAGTA

CCAATTATAGTAGCGCGGGCCAACGGATTGGATTACGCCTTTACTCAAGGAGAGGACACTGTATTGGCTG

CCATGACACACCGTTGTCCGGAATATGATTGTTATGCTATGAGCCAAGAAAGGAGAGATGCAATTGACAA

TGCTGAGGAAATGAACGCCGCTCCAGCAGAATCTAATGGATCCAACTCCAAAGGAAGAAAATCGAATAAC

CATACCTTAGTCCTTTTTGGGTCTCTGCCTTCAGGTGTAGCTTCTCAATCGAATTCAGAATCGAAACGCC

AATCCATTCATGTATCGGGTTGGTTGCCCTCCCAGAGATATGCTGAACTTCCAGCCTTAGGCGAAGGGGT

TTATGTTTGCGGTGTAAACCCTTTCTTAAGTCGCACAGCGACAACATTGATGCGGCGGAGGAAATGCCAA

TTGATTGGAGCACCCTTCCCGATCGGTCCCGATGGAACACGTGCTTGGATCGAAAAAATTTGTTCGGTAT

TTAACGTAAAACCTGACAGTCTAGAGCAGAGAGAGAATCAGATTTGGAATAATCTGAAAGATTATCTTAG

AATAGTAACCGGAAAATCTATATTCTTTATGGGAGATAATCTGTTAGAAATATCTCTAGCACGATTTTTA

ATTCGATGCGGAATGATCGTTTACGAAGTAGGTATCCCCTACATGGATAAGAGATATCAAGCTGCCGAAT

TATTACTTTTGCAACAGACTTGCAAAAAGATGGAAACACCCATGCCACGAATAGTTGAAAAACCGGATAA

TTATAGTCAGGTGCAGCGTATGCATGAGCTGAAACCTAATTTAGCAATTACCGGAATGGCTCATGCCAAC

CCTTTGGAGGCAAGAGGTATTGATACGAAATGGTCTGTCGAATTCACATTTGCCCAAATTCATGGATCCG

CTAATGCAAGAGATGTTCTTGAGCTCGTTACTCGCCCTTTGCGGCGCAATAACGACTCTATTCTGGATTG

GGGCAGTCTATCAAGACAAACGGTAGAAATCTAAGTTAAATGGTTTTGTTTTGAAATTACCGAGTAATAG

AAATTGGTCACTAATCATTATGAATGAATATGTAAGAACGTCGAAAAGTTCTTAGTCATAAAAGTTGTTT

ATTTCATTTTTATTTTCTATGATTAAGACGAAAGAAAGCTCCCTCCTAATTTCATTGGTAGACTTTTCTC

CCCTGGGTGCATAAATAATTATCAAAATGATTTGGAAAAATTACCCACTTATGTGTATAATAGAGACAGG

ATCAATACTAATTGGGATATTTTAAGGGATAATATGGGTAATGGCGATACTAGTTGCAAGATGTAAAGGA

ATAATGTAGAGGAGGGGGGGGGGGGGTAGTTATAAACATAAAAAACACTACAACGACATTAAATATATTA

AACACTTTGTCACTGGCTTGGGTCAAAATAGCGGGTCCCTACGTATTATTTGGCATTTACTATGGGTTAC

TCACAACACTACCCGTCGGACCTTCCCAAATCTTATGTGTAAGAGCTTTTATCATGGGAGGAAGCCTCAG

CGGTATCGTTGCCTTGAGTGGATCGATGGTGGGGCAGCTACTAATTATTCTATCAATATTTTGTTCACCT

ATATATATATTGTTGTCGAAGCCGCACGTACTAACTATCGCGGTAATACCATATATGTTCCTATTTTGGT

TTCGAACCAAAGACTTACCAGATTATCAAGCTTTCCGCCCTATAACCTCGTTGCGTGATTCGCAAATGGG

TAACCTATTTCTGAATAGTTTTCTCTTTCAGATAATGAATCCGATTCTATTGCCAAGTCCTGTATTGGCA

AGATTAATTCACCTCTTTTTGTTTCGTTATAGTAATAACGTAATATTCTTAATTAGTAGTTTTTTTGGTT

GGTTGGTCGGTCACATACTATTCAGTTATTTATCAAGACTACTAATAGTTCGTGTGGAAAAAGATTCACC

AATACTTTATCTATTGGTAAAACGTGCCATTCACAGAACTTTTAGTATTATTCTTGTTATTAATGTAATA

TTTTATTTGGGTAGAGCCCCAGTGTCCTTTTGGACTAGGAAATTCTTAGATGAGTCTAATGACAAAGACC

TCGACTTTTGGATATTCGAGTATAAGGAACTGGAATTACTGTGGTGGATTTTCAAGCCATGGCCTATCTC

TTTCTCCGAGCCTTGGAGAACAAATCGGCCTTTACGATTCAAAAAAAATAATCGATTCGACGTTGATAGT

CTTGTCAAAAAACGAGTATCCACCTATTTTTTTGATAAATGTGTAATCGATGGAAAACAAAGGTTATCCT

TTGCGGCGTTGCCTAGTCTGTCAATTTGTGAAAGATAATTGGAAGAGTCTTCAAACAATTCGGATGTATC

CGTGGGAACTTATCCCACATACAGGGACTGGATTTTAGAGAGATTGGTTAGGAGCGAAGCTTTCGAAAAA

GAGTTAAAGCACCGAGTTGAATTGTTAGACGACGGGTCTACTTTTTGGAAAGCAATGGAAAAAAAAATTA

GATTGACAAGTGAAAATAAGACTAGATTACCCAACGTATACGATCCTTTTCTAACTAATTCCTATCGTAT

AAGGATCCCGACTCCACAGACATTTTTAACAGTGGATGAGTTAGATTTGCCGATGAGGAGGGGATCAGGA

TCAGTGACAAATAAAAGATCAGCGACAACTAGAAGGAACAACTACATCGGTAGAAACAGTTCCAAGAAGC

GGATTGAATATTGGGTTTCTGCCAGAAATGAAAAATCGAAACATAGCAACAGGACTCCGCTTCCGTGGGA

AACTTTACCGAGAAAAGCTCAACGCATATTTCACTTCATGTTTAATAACCGACTATCGTTCGATTTTGAA

ATAGAAGACATTTTAAATGGAATAAATTCTTCATCCAGGGTCGATGTGACTTGGGAACAAATCTTCGATA

TCGATCCGATAGATCGAGCCCTGTTTTTGATTTATCTCGAAGAAGATTGTCGCAACTTCAAGAAGATCTC

TCTATCAGATATACTCTCAATAAATGGTGAAAGGCGCCCCTCTGATCCAAAATACGAAGCGCGCTCAATT

TATAAAATTGAGGATCTGGAAAAAGATTTGGCTCATGAGACTGAAATTTTGATGGATAATCGGTTCGATG

TTCCAGGCGTCGAAAGTGATGTTCGTTATAGAAAATTAAGAAATATAGGGATTAGTATTGCTAAGACGAA

ACGGAAGACAATAAGACTAGTAAAACGATTTGCAAAAATCTCTGATTTTCGTCGGAAAGTCGTAAAAGGG

TCTATGCGGTCCAGGAGGCGCAAGATATTGGTTTGGAAAATGCTTCAAGATAAAGCGCATTCACCCTTTT

TCTTGAGATTAATGGAAATACCTACCTTCTTCCAATTATCTATCGAGGGATTCACAGGTTTGAATTCTGA

ATTAATGATCACTGGCCCGGGAGAGGCGGCTGGTCTGCAATTTGAACAAGAACTAAAATTTTCCTCAGCT

ACGAAAGGCTTAAGTGGATCAAAATCTGCCCGTTCAGCTGTAGCGGCTAGATTGGATGTGGGTCCCATTC

ACAGTGGAAGAGGTTTATTGTTGGTTTTACAACCGAATTTTCGAAAATATATAAAATTACCTATATCTAT

AGCGTTTAAGAATTTTGGTCGTAAATTGCTACTTCAAGATTCTGAGTGGGATAAGGATTGGAAGGAATGG

AGAAAAGAGATTCATATTAAGTGTACGTATGACGGCGAAGAATTTTCACATAGTCGGTTTCCCGGTCGCT

GGTTGAAGGAGGGCTTGCAGATAAAGATTCTATATCCATTTCAATTGAAACCTTGGCGCACTAATAGGAG

GAAGAAACGATCAACTATTCGGGAAAAAATTAGAGAGATCAAATCTACTAGGGGTCGAGGATCAAAAAAT

GGCAGTCGGTTAGAACAAAAAAGGTCCCAATTTACTTATTTAACCGCTTGGGGATTTCAAACAGATATAC

CCTTTGGAACTATTAAAAAAGACCCTTCGTTTTGGAAACCCGTTCGAAGAGAATTAATTCGGATTTGGGA

AAAAAATCTCTCGCTGCGAACCCAGCAAGTATGGCGTTTATATTCCAAATTCAATGTAGACAAGATACTG

AGACCAAGTCTATTAAGGGGATTGAATCTATTTTTTGGAGTTGAACAAATATCAAATGACTCTGGTTGGA

ATGATATTACTGGGAAAGAGACTCTATCCATTAGACATAAAAAGAAACTAGTGGAATCGAAACCAAATAT

TGATAAAACAAGTGAAAGAGCGATTCATATTGACAATAAACTTAAATCAATAATTAATGCTGATGAAGGG

CTAGTGACGGATAATAGTGCGCATGGACTCGTGGATTTGTCAACCGAGAAAATTATTAGAAACGAGCAAG

GTACCAAAAAACTCCAGGTCAATGAATTAGTAATGGATGATAGGCTGAGGGACACGAACCTTACCGTTCC

TCTGAGATTTGAAAAAGAAATAATGGGTTTTGGTGGAATTATATTGAAATTACGCGTATTGATGGCGGAA

GTAAACGAAAAGTCTTTGTTGGTAGCATCAACATCCTGCCAAAGAATCAACAGAGCTATTGCTCATTACT

CTAATGAATTTGCTGCGTTACAGGCGCAACTGATAAAAGTGAAGAGTAACACTATTGAGGTTTACGAGGA

GACAGAAAACTTAACTTTATCTGTTTCCGGAACGAAAAATGGGGTGTGGCGAGTTGACAATTTTCAATCA

CTATCTCAAGCTCGTCTTTATGACAATATGTGGAGCATGAGCATAAAGGGAAATCTAGATTTGAGTTTTA

TGATGAATGGAACCGTGAAGAGCAGTAATTCTGGAAAAGGAACCAGATACACCGGGGATTGGGATAATAG

TTCAACGTTGTATCAGACTGGGAAAGATTGGGGTTCTGCAGAGGATTATTACGACGTGACGGGTAATAAT

GATTATTCGATAAATAAGATGAAACTCTTAGGAATAAATGAGAGTAATAGTGATATAAACAATCTCCTAG

ATTGTCTCGATGAAACAGGTAACAAAATTGTACATAAAGTTATTAATGAACACATCAGGGAATCTGTAGA

GGGGTGGGGATTCCTCAAACAGCTCTGTGAATTAGATGCAAATAATTGGAATAGGTGGATAGATTGTTTC

TACAGATGCAACTTACCGCTAGAAGTGTGGCGTAATATAGCACCTCAGAAATGGAGAGTCGGTTTAGATA

ATTCGAACATACTTAAAAATATTGAGAGAAAGATTCTAGATGAGCAGGAACAATATGTCCTTCGGGACAA

TTATTCTATCTATACCAAAAACCCCTTGCTTAGAGACCGAATCCAAAATTTTAATAAGCGCCGCAAATAT

AGTTATTCATTACATAGTTTTGTTGATTTTTTACGAGATGCAGATACACAAAAATTTCCTATGCGACAAG

ACGCTCTCGCGCAAAAGGTTCATTCCGAAAATCGTATCGAGAATTTTAGTAGAGTAGGGGGAAAGAAGAA

ACTTTCTTATTCACATATTTCTGATTCAGAAATTAATTTTAACTCAAAGTTTGATTTGATGCTATGGGTA

GTTCCGGATCTCACGGGAATCAAAAGCACTTTTATAAAAAAACCAAGATTAAAAAAGTATGTTTTGAGGG

ATGAGGGTCCTAGTTACAGGATAATAAAATTATTAGATATAGATGGTAGGTTTCAAGATACATTGAATGA

GATATACGAGATAACATTAGATGAGAGAGAAAGTCCTGATTACATATTTCGGTGGAAATGGAAATCCAAA

GCATTAGAGGGGGAACTAGATAAATTGAGGAACTTGACAGTCCTCATTAGCATATTGGGAAATGACCAAG

ATCTTACTGCGTTCTGCGTCAATATAGGCATAGAGTCAGATCTATTGAATCTCTTTTTGAACACAACTAG

GCTTAGTGTTTTAAATAACTTATCTATTGTTTCGGCCCATCGTTTACCGCTAGTATTTGACGATCAAATT

TTGATGTACAAGATTGTTACCCCTCTACTAAAATTTAAGTATAGATTTAGAAATAGATTCAAGAAACGGT

TATATAAGGATATATCTAATGGATGTATATCACGTTTATCACTTGTAGCAATAGAAGGGAAGACTAAACA

GTCTCAGCTTTATAACATCGAGGATCTTATGCTTCCGAGACGTCGACGGGAATTACGATTCCTTCGATCT

CTACTAAGTCTAGAATCTCCAGAACTGGAAGAACAGTATTTAGCTCCCATTCCCGAAATCGGGCGGTTTC

ACGGGAATAAGGAGTCTAATTATTTCGCGCTAAATGAGGTCCAAAAAATTAAACGCTTCCTATGGCCCAG

CCATCGTCTAGAAGAACTAGCCTGTGTAGGTAGATTCTGTTTCAATATCACTAATGGAAGTTGATTCGCC

ATGCTCAAGATACGGATGTATCCTATTATTAAGAATTGACGCGAGCGGAGGAACATAAAGTAAAAGCGTA

AGTTTGAGCATTTGCTTGATTGGGATTACCCAAACAAAAAGGTAATCCAAATCAAGTATTTGACGTATCA

ATTAACTGATCGCCCACCTGCAAGCCGTGATAAAAAGACCTGCTCATCGATCTCCAAACAGTGAATCTAG

GGCCTGTTGCAATACCATTTTTTTTTTTTTTCAATTCAATTGAACTTTTTTTCCTTTCGCTCAAACCGAT

ACTGCTTCAATTGAATTGTCCAATTGGTGACTGAATCTCTTATAATCAGTTTGAAAAAAGAAAAAACAAT

CATAATTATTATTGTTACTATGAATAAAAAGATATCTATTGATTTGTCGTTAATGGATGAGAACAAAGGT

ACAGGATCTGCTGGCTCCCAAGTCTACTATTTGACCCATCAAGTATCGAAACTTACTTCTCATCTGGAAT

TGCACCCCAAAGACTATTCATCTCAAAGAGGTTTGTGGAAATTATTAGGCAAACGCAAGCGTCTCTCAAT

CTATTTATCCGATAAGAATCCAACTTTGTATAATAAAGTTATAAAAAATCTAAGTATTCGGGGATTAAAG

GGGCGTTGATGCAAATTTGCGCCGGAAGTTGCTACTTCGATACATATGGTACATGATAAAACTTTTCTAT

TTAGTTACTGAAGCTAGATTTTGTGATATTTATTGGAAAGGAAACAATTTACGAGTATGCCTCTTAAAGA

AATAGATCCAGTTACAGTAAGTATGGGTCCTCATCATCCATCGATGCATGGTGTTCTTCGGCTTATTGTT

ACTCTAGACGGCGAAAATGTTGTTGATTGCGAACCAATATTAGGCTATTTACATAGAGGGATGGAGAAGA

TTGCCGAGAACCGGACGATTTTGCAGTACCTTCCCTATGTAACAAGGTGGGATTACTTAGCCACCATGTT

TACCGAAGCAGTAACAGTCAATGCACCGGAGAAATTAGCAAATATTCAAGTACCTGGAAGAGCTAGTTAC

ATACGTGTAATCATGCTTGAATTAAGCCGAATAGCTTCCCACTTGTTGTGGCTTGGACCCTTTTTAGCGG

ATGTTGGTGCGCAGACTCCCTTCTTTTATATATTCCGAGAAAGGGAAATGATTTATGATTTATTTGAAGC

TGCTACGGGTATGCGAATGATGCATAACTATTTTCGTATCGGGGGAGTCGCTGCAGATCTGCCATATGGG

TGGGTAGATAAATGTTTAGACTTCTGTCATTATTGTCTTCCAAAGATTCATGAATATGAGCGACTAATTA

CGAAGAATCCTATTTTTTTGAGACGGGTAAGGGGAATCGGTTTTATTAGTAGGGAAGAAGCTATCAATTG

GGGCTTATCGGGACCCGTGTTACGAGCCTCAGGGGTTCAATGGGATCTCCGCAAAATTGATCATTATGAA

TGTTATGATAACTTGGATTGGCAGATCCAGTGGCAAACAGAAGGAGATTCGTTGGCTCGTTATTTGGTAC

GAATTAGCGAAATGAAAGAGTCCATAAAAATTATTAAACAAGCATTGAAACTCCTTCCAGGGGGTCCATA

TGAGAATTTGGAAGGTCGACGTTTCAATCAGCAACAAGGTGAAGTAGAATGGAATGATTTCAATTATCAA

TTTGTTGGCAAGAAGTCCTCTCCCACTCTTAAGTCACCTAAGCAGGAACATTATGTGAGAGTAGAAGCTC

CCAAAGGAGAATTAGGAGTGTTCTTGATTGGAGATGATAGTGTTTTCCCTTGGAGATGGAAGATTCGTCC

ACCTGGTTTTACAAATCTACAGATTCTTTCTCAATTGATAAAAGGAATGAAGCTAGCAGATATTACGACA

ATATTAGGCAGTATAGATATTATTATGGGAGAGGTTGATCGTTGAAACGGTAACTGGTATCGAAACTTCC

GGAGAACAAGTAGTTCACTTATTTGATGAATTAGTAGTTGCAAAAGATTCTTTCAAATTAATTTGGACTT

TAGTATCTATACTTATCTTAGTTATAGGAGTTACAACAGGAGTATTAGTCATTGTATGGCTCGAATGAAA

AGTGTCCGCGGGGGTCCAGCAGCGTATCGGACCAGAATACGCGGGTCCGTTCGGAATTATCCAATCTCTA

GCAGATGGAATCAAGCTTCTATTAAAGGAAGACATTGTCCCAGCTAGGGGCGATACTTGGTTATTCAATA

TTGGCCCAGCCGTGGTAGTCATACCAGTTTTCATAAGTCATTTGGTAATACCTTTTGGTCAACATATTAT

TCTATCTGATCCGAGTATAGGTGTTTCTTTTTGGATCGCTATCTCAAGCATTGTACCCCTAGGTCTTCTC

ATGGCAGGGTATGGCTCAAATAATAAATATTCTTTTCTGGGCGGTCTTAGAGCCGCTGCCCAATCTATCA

GTTACGAAATACCCCTGGCTTTATGCATCTTGTCCATATCCCTACGTGCGATTCGTCGAGTATCAGTCGG

AGGTAGATACTTCGAAAAGAAATCTTCGTTGATTGATAAACTAAATAGTCATTTGGGTGAGATCGAACAG

CGTTTCGCAGTTATTGAGTCGAGTCCCAGTCTCCATGTACGGGTGTAAAAGCATATCCGTATCCGAGCGG

TAGATACTGCTCTTTACCCCAGGTCTAGGATTAGTCACCGAGGCTTGAAGCGGGAACGAGCAATAATCAG

GTTTTCCTAATTAAGCATGAGTGGATGGTCAGGAACACTAATATACGCAAGAGATTTGTAAGATAGAGGA

AAGAAGGGATAGAGGGCGGGTACCAATGGATTTTAAAAATAATCAAATCACGTCTTTATCTATTTATCTT

TTTACTTCTACTGGATGAGAGAGACTCAGCTTCGGTAGGGGTGCCTGAGTGGTACATCTAGATAGAAAAT

CCCAGCCTCGAGTATATTCCTATCCACTTCAATCATGACTACTTGGAACGAAGTAACCCTTGCAGCAGTT

TCCCGATTCTAGTAAAAAAAAAAGGGAGATTACTAAGCTAATCATTCGAGGATTTCCCTCCCCAGATGCG

GGTGAAACCTTTTTCTAGACGGAACCGTATGGTAAGCATGAAAAAGCTTTGTGAAGCATTTTAACCCATA

TTCAAAAAGGACTGAGAGGGTGGAGATGGATTCGGAAGCAGTTACTTCTTGCGGCAAACGGAATCTCATC

GGTTAGGATTGGGAGAATCTTCATACAGCGGTATCGGAAATGATAATTTTAAATTATTGACCCTTCTCCA

TGGAATCGATGGGGAGCCGTATGAAATTCTAACTTCATGTACGGTTCTGAATTAGAGGTGGTAACTAGAC

TCATACCGTCGACTATCCTTATCCGGTAGCTTGAGTACAGTTGATATAGTTGAAACGCAATCTAGGTTTG

GTTTTTTGGGATGGAACTTATGGCGTCAACCCATAGGTTTCATAGCATTCTTCATCTCATCTTTGGCAGA

ATGCGAAAGATTACCGTTCGACCTACCGGAAGCGGAGGAAGAACTAGTAGCGGGCTATCAAACTGAATAT

TCGGGGATAAAATTTGGTTTATTTTATGTTGGTTCTTACCCAAATTCATCGGTTTCTCCATCATTTGTAA

CGGTTCCTTATTCGGGTGGATGGGATTCATCAATTCCTTTTTTTACTAAGTTTGGGCAAGATTCTCTCTC

TTCGGATCTTAGCAGCGAATCCTTCGATTTAGTGAGAATAGTGATAGATATCATTACTACATTATCCAAA

TCTTATTTGTTTTTATTTATCTCCATTTTGACAAGACGGACTTTGCCCAGAGTGAGAATAGATCAATTAT

TGGATCTCGGATGGAAATTTCTTTTGCCCATTGCTCCAGGAAATCTGTTGCTGACAGCTTCATTTCAACT

TCTGTTACTCAAATAGTATATGCTTTTTTTTTTATTCCAACAGTATTCGAAGTCAAATCTATTCAATCTA

TTTATTTATATATATATATATATATATTTTTTTTTTTTTAGATATATATATATATAAATAGATTTATTAT

AAGAAAAATAATAATATTATTAGGTTTATCTATCATATGTTTCCCACACTAATTAAATTTCGAGATTATG

GGCAACAAGCCATAGAGGCTGCAAAGTACATTGGTCAAGGTTTTGCAGTTACTTTAGATCATTTGAATCG

TTTACCCATAACTATTCAATATCCGTATGAAAAAATTGTATCATCCGAACGATTTCGTGGACGCATCCAT

TTTGAGTTTGACAAATGTATCGCTTGTGAAGTATGCGTCCGAGTATGTCCGATTAATTTGCCTGTTGTTG

ATTGGAAACTAATAAAAAGCATTAGAAAGAAACAATTGAAGAGTTATAGCACTGATTTTGGAGTTTGCAT

CTTCCGCGGAAACTGTGTCGAATACTGTCCGACTAATTGCTTATCAATGACCGAAGAGTATGAGCTTTCA

AGCTACGATCGTCATGAATTGAATTATGATCAAATGGCTTCGGGGCGTCTACCCCTCTCCATCTCCCAAG

ATTTTTCAATCCAAACAATTTCAGCGAGTTACCTATCCAAAAGAGCTATGGGTAGACATTCTGATAATCA

AACAATCACCCGTAGTGCCAATTGAATATTTCGATAGATGAATCGACTCATCTAGTTACTAGTTATCTTT

GAGAAAGAGATGGGATTAATAAAAGAGAGAGAGTGAATACAACTAATAGATGATATTAAAATATTGGAGC

GATTGTGTATAACGAATTTATCCGAATCAATTCATGGAGCTATTTTGACATTAATAGAATTAGGTATTCT

ACTAGGAAGTTTGGGAGTAGTATCACTCGCTAATGTGGTTCATTCTGCTTTTCTTCTCGGGCTGGTTTTC

ACCCGTATATCCCTGTCGTATCTCGTATTGAATGCTGATTCCCTAGCTGCCGCGCAATTGCTGGTTTATG

TAGGAGCTATAAATGTTTTAATTGTGTCTGCCGTAACGGTTACTGATGAACCAACGAGTCCCAATTCAAC

CACTAATTGGAGTATAGGATATTTCATTACTTTGGGAGCTTGTACAGGTCTTTTTTCACTATCAACCATT

ATGATTTATAGTACAAGATGGTCTATCGTTAATGAATCAAAGATTCTTGTTGAAAAGACCTCGGAAAATA

ACGTTCAAGGGCTTGGATATAAGTTATTAACTACTTTTCTAGTTCCGTTTGAACTTCTTTCCATACTTCT

TCTAGTTGCTCTTGTAGGAGCAATTACCCTAGCCCGTAACGAAGAAGTAACCACAATGAACGAAAGGTCT

GTTTCATCATCATCTCGGAATACCTCTTCGCTTTTTTGATCAATCTTGACCTTATTGAAATAGAAGGGTT

AGATGATAAAACCGCGTAAAAATTGACTTATCAGGTTTTTTTGGGGAGGAGGAGGTTAATATATCACGCT

TGAACACGGACTAGTGTTAGGTGCCTATCTTTATTGTGTTGGTTTCTTTGGATTAATTACCAGTCGAAAC

ACGGTTAGGGCACTCACGCGTCTTGAGTCAATTTTTAATGCAGTTAATATTAATTTTACAACATTCTCCA

ATTTTTTTGACAATTCGCAATTGGGGGGAGAAATATTCTCTTTATTCGTAATAGCCGTTGCGGCTGCTGA

AGCTGCTATTGGATTGGCCCTCGCTCTTGTTATTCAGCGAAACAGAAGATCGACTCGTATCGATCAATTC

AATCTGTTAAAATGGTAATTGATCAATAAATACAGCGTTTCTCTAAATCTAATCAATTTGGTGTTCAATT

TAATAACGGATATTGCTGCCGATCGAATCGTGTCACAGCCCCCCCCCCCCCTCCCCTCTCTTTGATAACT

AGGTTTCTCTCCTTACCCTATACTTCTATATTCTTATTTTTCCCTTCTCCTTTTTATTTATTTTTTATTC

TTCCAAAAATGAGAAACAATTTTATACAAGCATTAGACCTGATCGGGTAGATCATATGAAGGGAATGTTT

CACTTAATGATGAAAAGTATCAGCGTAAGGGGCGGGGAGAGATAGGTGTATCCTAACCATTTAAATAAAG

TAATATTTTTGGTATATCAATCTGATAGGAGTAAATAGACTCAATGGCACATTCAGTGAAAATCTATGAT

ACATGTATCGGTTGTACTCAGTGCGTAAGGGCATGTCCCACAGATGTGTTAGAAATGATACCCTGGGATG

GGTGTAAAGCTAATCAAATAGCTCCTGCTCCTAGAACAGAAGATTGTGTAGGTTGTAAGAGATGTGAATC

CGCTTGTCCAACAGATTTTTTGAGTGTACGCGTCTACCCGGGAGCTGAAACCACTCGCAGTATGGGTCTA

GCCTATTAATTAACCAGTAGAGTTAGAAAAAAAAAAAATTAATTTTTTTTTTTCTACTTTATTTCGACTC

ATACTCGAGGCTTCATAATCACGAAGTCTAGGTATGAGTCGGGATAGTTAGTTTACACAGTCCTTTATAT

CAAAAATTATTTTCTATCCATGATGAGTAACGTACCTCGGCTAACGATAATCGTTCTCTTTCCAATTTTT

GCAGGTCTGCTGCTTCCGAGGCTGCCGCGTAACGGAAATAGAATTATTCGATGGTATACCCCGGGCATTC

GTATACTAGAATTTCTACTAATCATTTATATTTTTCATTGTCACTTCCGACTCGATAACCAATCCATTCA

ATTGATAGAAAACTTTAATTGGATAAACTCTATTAATTTTCATTGGCGTTTAGGTATTGACGGACTTTCT

ATGGGTCTTATTCTACTAACAGGTTTTGTTACTACTTTAGCAACTCCAGCAGCTTGGCCGATCACACGCA

ATACGCGGCTATTCTATTTTCTAATGTTAGTTATGTATAGTGGCCAAATCGGATTATTTGCTTCTCGAGA

TATTTTGCTTTTCTTTTTCATGCGGGAGCTAGAACTAATTCCAATCTATTTACTCTTATGCTTGTGGGGT

GGAAAGAGACGTTTATACTCAGCCACAAAATTTATTTTATACACAGCTGGTGGTTCCATCTTTCTCTTAG

TAGCAGCTTTAACTATGAGTTTCTACGGAACCGAGGTGCCCTCGTTCGATATTCAAGACTTGACTAATAA

ATCGTACCCCATATCATTGGAAGTACTTTTTTACTTGGGGTTTTTAATTGCCTATGCTGCGAAATTACCA

ATCGTTCCCTTTCATACTTGGTTGCCCGACACCCATGGAGAGGCACATTACAGTACGTGTATGTTGCTAG

CTGGAGTATTGTTAAAGATGGGGGGATACGGATTGATCCGAATAAATTTGGAGTTATTGACCCACGCACA

TTCTATATTTGGATCATGGTTGGTACTGTTCGGAGCAATCCAGATTGTATACGCTTCTATGATTTCGCTG

AGTCAGCGTAACCTTAAGAGAAGAATAGCCTATTCATCAATTTCCCATATGGGTTTTGTAACCATCGGTA

TTGGTTCCTCGACAAATACGGGTATTAATGGAGCTATATTACAAATGATTTCCCATGGTTTAATAGGTGC

AGCTCCGTTTTTCCTTGCGGGTACTTGTTACGATAGAACCCGTACCCTTTCCCTCGACCAACTAGGAGGG

ATTGCAATTCCAATGCCTAGACTATTTACCATGTTTAGTATCTTCTCACTGGCATCTCTCGCGTTACCGG

GAATGAGTGGGTTTGCATCAGAATTATTGGTATTCCCAGGAGTCGTTACTAATAAGCAATATTCATCTCT

ATTTAAAGTGGCGATTACGATAGTAGAAGCAACTGGTACAGCATTAACTCCCATCTATTCGTTATCTATG

TTACGTCGAATATTTTATGGGTATAGACTGTCCAACGAATCGAATCCGTATCTAATTGATTCTGGTCCGA

GGGAATTATTTATTTTGATTTGTCTCTTCCTACCAATACTAGGTATTGGTCTATATCCAAATATGGTTCT

ACATCTATGGAATAGTAAAGTACTTTCGATCTTGTTTTCATATTCTCTTATCGAATGAAATAAAAACGAG

AAGTAACCATACCTTAAGTTTAAGTATTAGACCTTTTTTTTTATTCCAATTGATAGCAAAATGTCGAAAT

TTGTTTCGTATCCAATCCTTATTTAGTAGAAGAATTTACTAGTCTCAGTAACATCATTTTAGGATTATTC

GTATGATAACGTTGCCCCGCACGTATCTGTCTAGGTAATCGATACTACGAATTACCATAAATGGGGATGG

AGAAACAGAAACAAACAGATAAAGCAGATACAACTTTTTTCTATTTATCTTTTAATTGTTTGTTTCTGCT

CATCCCTTTTTTTATTTATTATTCAAGTAACCGATTGGAATTGATTACATAATAATTAGGAAAACCTTTT

AGAACGGTAAAGTGCCTCAGTTTCTTTCTCTTATTCTTTTATTTATTTTCCTTGTTCTCAGATTAACCAT

CCATAGTTGTGTAATCCGATTCCCAATAGATTGACTCCCGAAAAACGAATCCAAACCAAAAAGAATCCTG

TAGATGCCACTGCGGCGGATGCCTCTCCCCCCCAACTCTTAGTTATCCTGGTATGAAGATAAATAGCATG

TATTAGCCAAGTCACTAATGCCCAAGTTTCTTTGGGATCCCAGCTCCAGTAAGATCCCCATGCTTCATTA

GCCCACACTGCTCCGGGAAGAATACCAATAGTTAGAAAGGAAAACCCTAAGCTTATAATTTGATAAGCCC

ATTGATCCAATTGATTAATCAACTGGCACTTGCGTGAATTTAAGGATAACAGGTAGAAAGGATTATCCAT

GTCAGTTTGTTTTTGATCGTGATAATAACTATTTGTATTCAAGAATCGGTTGCACAATTTGCAAATCGAT

TGATGGTTCATCAAGTTGGGAATAGAAGATCTATTCATTTTATCAAAAGAAACAATCGGTAAAGATATTG

CTGATAGGGATCCACGTAACAGGGTTGCATGGCTCAGTAACATCATACTCACATGCATCATTAACCGATG

AGACTGCAAAGCGGGTACTAGCTGCGTGGATTGTTGCATTCCTTCAGGAAGACCTGAAGTAGCAAAGGCA

TGAGTAAGCATAGCACTTGGTGCCGTGACTGCACCTGACCACTCATTCTGATGTCTAATCTTCAATATTA

TGTACGATAGGGAGAAGCTCCATGAAAGGAACATGGATGATTCGTATAGATTACTCGATGGTAAATGCTT

GGTTTGGACCCAACGAATTAACAGAAATCCTGTTGTACGAAGAAAAGCAATTGTCATAACTTTTCTATTC

AAACTATTCAGTCTATGAGGCCTATAAGCTAGATCGATCCAATGCGGCAAAGTAACAGGAAAAAGCATAA

GAAAGGGAATGTGAGCGAATATGTGCTCTATATCAATGTACATCGTAATGAAAAAGGACCAGTGAATTAA

TCAGATTTGATCAGCATCAAATTAATTAGTATTAATCAACTTATACCATCTATTTCTCATTCGAGAAAGA

TAAGGAGATAAATTGGGAACTTTATTATGTGAAGTTGAAAAAAGAAAAAAAAAAAATAGATATTAGATCC

TTATTGTCATTACATTTAATAAATTCATTGCATAATATTTATTTGAGGTTCAACTTTTTTTTTTTATAGG

TTGCACTGGAATGCCGCTACTCGGATTCGAACCGAGATGCTCTAGCACTGCTTCCTAAGAGCAGCGTGTC

TACCGATTTCACCATAGCGGCTTATCAGTCACCCAACTTAAGTTTATCATAGTTTCGAATAATAGGTCAA

TATTTTTTTTTTTTTCTGAACCAGAAGGATGTACGGGGAAATCGAGAGTAAGAGTAAAAAGAAAAACATT

TGGTAGTATTGAATCCATATCGATATTCGATGCTATACTCGTATGGGGGTAACGGAATATAGCGCAGCTT

GGTAGCGTGCCATCTTGGGGTGATGGAGGTCGCAGGTTCAAATCCTGCTATTCCGAATGGATAAACAAGT

AACGGATAATAGTCATATAGTGAATCCAAAAACTTTATATTCGATATTTTTTTCATTTAAGTAATTAACA

ATGTGACACTTACTTATACATATATGGAGAGGGGGAGCTTTCCGATCTTGAAGTACAAGGGAAAAAAAAA

AAAATACTCTATATTTATATAGAGTATTTTTCCATCTCATACGTACTATCTAGACATCTATCCCCCCCCC

CTCCTCTCTCGCCCTCCTCTATAGCTTCGATTCGTCAGTGGAAAATCTCTATCTATCAACCAACGTAAAG

CATCATTTGGTTACTATGATGTCTAATCTAGTATTGTGACTTGATCTTTCTAGTATGTCTCAATCAATGA

TATATGAAACGTGCCGCTTGTTAGTTGAATCTATCTCTGTGACGAATATGGTTATATCTCTCAATGATGC

ATGTTGGAACAATGCAATGAGCGTAAGATATTAGTTTTTTTTTTTATTTTCTTTCGGAAATACTAAGTCT

AAGTTAACAATTAATCAAATAACTTGGGCATATCGTTGATTATTATGATCCGTATCACTTGAAATCCTCT

TACTTTAATCAGTTACTTTTGGAATCTTCGTGACTAGTCACAAAAAGATACTTAATTTGTTTCAGAAATT

TTCTCGTTTGTTATATAATAAAAACTTTTTGAACGACCAGTTAAAATGGATTGGGCTGAAGAAAAAGCTT

TTGATGCTACTTTCACCGCTTTAGCCCTCCACACACGGTTACGAATTCTTTTCCTTGACCCGGAGGTACG

TTTCTTTGGAACTGCCATAAGGATATATATGTATATATATATATATATTTTTTTTTTTTTAATATCTATG

ATTGAATTGAGAAGGTTAACTATATTGATACGTATCAATAGAATGGATATAATGAGAGAAAAGAAGAAAT

GAATGATGCGATTGAAAAGTACTAAAAAAAAAATCAATAGACTTACGTTTTTGTTATACTAACTTTCTAC

GTAACTAGTGGTTGATACAAGAAATCAGTTAACAATCATTTAATTCTTTGCCGTTGAAATAGATAGAATC

GACCACAAATCGGATCAAATTTTCTCTGTATCCAACTTTTCTTCATGTTTTCTTCTTAGAATGGATCTTT

TGTATCACTATTTTACTTCCGAAACAGGGGTGTAGTATTCTTCCCCTAACAGTTGCATCACTCAACCATG

GATGTCCAATACTTATTTCGGATCCACGACGAATAAGTGAGACTCGATTTATCGATACTTTCATATTGGA

CCCCGATACGTCTTGAAGTGACGCGAAGTGACGAACGTCATAGAATCTTCCTGGTTCCACTCGGAGTTGT

TTCCCACCAACGTCAATTATTGCATATCTATTCATTACGATTTTTTTATACTGAAAAAGGGTTTGTGAAA

CCAATCGGTTTGGGATTGAAAACTTTAATTTAGATAAGTATCTCCAACGTATTTAAATCTTGTCAAGTTG

CAAAGATTCGATTGAGATAGAAGATAAATAACTTATCTAGTGACATACTAATAATTCCATTCCCTATTGT

TCCTTTCTTTTTTAGAAGTAAAGAAAAAAAAATTAAAAACAACAGATTCAATTCAAATTTAATATGTTCG

CGGAATTTTCATATGAATATGTTTGGATCGTTCCTTCGTGCCCACTAGTAGCTTCCGGCTCAACTGGATT

AGTATCGTTCTTACTCCCAAAAGCTACGAAAGGTCTTCGCCGCTCATGTGCCGCGTTCAGTATTCTCTCA

CTAACTGTTTCTATGTTTATTTCCTTTCTTTTCTTCTGGCAACAAAATGTTAGTCACTCCACCCAAGAGT

ATTTGTGGTCATGGATCCTTAAAGATGATATTTCCCTGAAAATAGGTTTCTTGGTAGATCCACTCGCTCT

TATTATGTCAATATTAGTTACTACTGTAGGTATCTCAGTCACGATTTACAGTGATAGTTATACGTGTCAC

GACTAAGGATATGCAAGGTTTTCCGCTTATTTGAGTTTATTCACCGCGTCAATGTTAGGATTAGTCTTCA

GTCCTAATTTGATACAGATTTATGTGTTCTGGGAATTAGTGGGGATGCGTTCTTACTCGTTAATAGGTTT

CTGGTTTGTGCGACCTAGTGCTGCCAATGCCTGTCAAAAAGCTTTTGTAACCAACCGTATAGGAGATTTT

GGGTTGTTATTGGGTATATTGGGTATCTATTGGATAACCGGTAGCTTCGAGATTTATGAATTGTGTGATT

GATTCATTGAATTAATTAGTAGCGGTAGTGTTAACCCCGTCCTCGCTAATATAATAGCTCTTCTACTATT

TTCAGGGCCAGTGGCTAAGTCTGCGCAATTTCCACTCCACGTATGGTTGCCGGATGCAATGGAGGGACCC

ACCCCTATATCAGCTCTTATACATGCTGCTACTATGGTAGCTGCTGGAATCTTTTTCATAGCTCGAATCC

TTAACCTGATTGAAATATTACCCTTGAGTATGAGTGTTATTTCTTGGGTAGGTGGAACAACAGCCCTATT

GGGGGCAACATTGGCCCTCACTCAGAGGGATCTTAAGAAGGGTTTAGCCTATTCTACTATGTCTCAGCTG

GGATATATGGTGTTAGCCTTGGGCATTGGTGCTTACCGATCTGCTTCGTCTCATCTTATCACACACGCTT

ATTCCAAAGCCTCATCATTTCTTGGATCTGGTTCAGTCATTCATTCGATGGAAAAAGTAGTTGGATACTC

TCCCATTAAGAGTTAGAATATGCTTCTCATGGGTGGTTTACGGAAGTGTATGCCAATTACCGGAACTACT

TCTTTTTTAGGTACTCTTTCTCTATGTGGTATACCGCCACTAGCCTGTTTTTGGTCTAAAGATGAAATTA

CTGCAGAGAGTTGGTTATATTCCTCTTACCTTGGATGGATAGCTTCCATCACAGCTGGTTTCACTGCGTC

TTATATGTTTCGTATCTATCTCCTCACATTTGAGGGAGATTTTCGTGCCAATAATATTAGTCATAGCCAT

TTCGGTATTTCTCGTTTATCCGATAATAATATTAGTTTATGGGGGGAAACTAAAAAAGAATTATCCATTG

AAAAAAATATTGACAATCCCTTATCCTCACAGAATGCAGAGCTTCCGGAAGCTGTTCCAGTTGCATATTC

TTATAAAAAGAATCTGACTCATGAAAAAGGAATTCAAACAGATTCCGATTTGTCCCACTCCCACAACTTA

TTAAATCCCGAAGAATCAGATTTTTCTATGGTATTACCTCTGATAGTGTTGGTAATGCCCACTTTATTGG

CTGGGTTGATAGGGGTCAATTTTATTCAAAAAGAAACTGGTCTTGATTCATTGTCCGAATGGTTGATTCC

CCTCATCGTTCCTATTAAGTCTAATAAAGCAAATTTGATAGAACTCTTGATAGATTCAATCGGTTCGGTC

AGTTTATCTTTCGTTGGAATATTCATTTCCTATGTAATGTATGGACCAATTTCTTTTTATCAAATAAAAA

TATACAAATATATTCGGGATATTAAAGTTCTAGATGAAAAGCTGTTGAGTTCGTTTGGACATTTCATTCA

AGGTTGGTCACTAAATCGCGGGTACATCGATTATTACTACAACGTCTACCTCATAAAAACTACAGTCTTT

CTGAGTAAACTAGTCGTATTTTTTGACCAATGGGTAATCGATGGAATTATCAATGGGACTGGTGCTTCTA

GCCTTTTCGGTGGGGAGGGTGCAAGATACGGGGGAAGCGGTAGAATATCTTATTATTCATTTGGATTAAT

TACTGGAATTATCCCACTAATATTACTAGCAGTTTTCGTTCTTCCAATTACTTGAGAAAGTAAATAAAAA

AGCTCCAATTCGTGTTCATTTCTTCCGACTGCTCCTCATCTTCCCCATCTCTATTTCTCTCCTTTTCCCT

TTCTTTATTCTCCCTATTACTATTGAAAGATATTCCTTCTACTTCTATGAGGTAGAAGAATCCTGTGGCT

ATTCTACTATGCTTCTAGGAAGGGGGAGAATAGAAACTATTGATTGGTGATTGATCGATACAGATCATGG

GGGGGGGCAATCAATCATGGCCAAGATCAACCGCACCAGCCCCCCCCCCCCCCCATGATTCGGGGGCTCT

ATTCAAATAGGATTGCTATCGCTGCCGCTTCTTCCTATAATAAGAGTTAGGGTGTACACAAAGTTTGTGA

AATGTCGGAGGAAGCTTAACGTCTTGCAGATTCAGAGGCGGCTCAAAGAACAAGGGTCTTTACTTTAAAT

GTGTATGAGACTAAATCCCCTACCATTTTCCCCGGTAGCTCAGCGGTAGAGCGGTCGGCTGTTAACCGAT

TGGTCGTAGGTTCAAATCCTACCCGGGGAGATTCATCTATTTCCGGTGGAATGAAAGATGGTTTAGATGA

TGGAGATGATGGAGATGATGATGCTTCTTTCGAATAAAAGACCTTGATTCACGCTAAAAAAGGGGAAGGT

ACATTCTCATAATATCCTTAAAAATTTACATTATCTACATAAAAAACTCCCAGTGATAGGATAGTTGTCT

TTCACCCATATGCCAAATCAAATCACTATAACCCATCAACCAGTGAAGGATTCACTATCATGTTTATTTC

AAGCTTCAAGAATTGATGAAAGAACCAAAACGTTCCCCTCTTTTGGATAATTCAATGCTTCTAAGGACCC

TATTTAAGCGTCGCTTTTTCGAGAATCCCTACTCCACTCCGGTGTACTGAATGATTGGGATAAGCAAATC

AATCAGTCACCTCGAGAGTGAATCCACAATTTTATCAAGGATCTACTCCGAACAGGATATTGAAAAGTTG

CTTCCCTATAAACCGCTTCCCATACTCCCTATAGAAGAAATTATTATTCTTCCTTTTTAATTTTTTTTTT

TTTTTTTTTTTTTCAAGTAGAAAGACTCATCTAGTAAATGATCTATAAATTCTTAATCATTTGAGATGCT

ACAAGCAGAATCTTATTGTATCAGTAAAAGGAAAAGATAGATCTTCCTTCTACTGATTTGACTTCTAAAT

ACCTCTATATTGCTAGAGATCTAGACTGAATGAATAGTATCTAAGATTTTCTTATATGATATTGAACTTT

CATTAAGAAATTGTTTCGTTATTTGATCCAGTGACGTCCCACCAAACTGGAACGGATTGAATAGATATTA

ATAAGTTTCAAGCAACATATTATAGATAAGAAAATCCTTAAATGGGGAACGGTTCCGTCTCATCCATCTA

TTTCTATGAACCAGAAGCCTAAAACGAATAAATCGCTCTTGCAAATCTTCTACTACAATGCTTTGATACA

AGTGAATGGGAACAAATATCTGTGGATATTGCAGATGTATATGCATAAACTAAGTTTCTTTGACGTATTC

GGAATGTCGCTCCTCATCCAAAGGAAAATTATTCCACCGCTTAATAGATGATTCAGCTATCGATTTCGGA

TCATATCCACGATAGAGAAAGAAATTTTTAATCTTTTCGTTTGAGAAATGTTTTTCGCGCTCCCTTCTCA

TACCGTAAGTTACGTAAAGCCTCCGCACCAGTTCTTGATTTGCTAATAAACTACGACGCGAGGAGGGAAT

ATTAGGATCCGGCTGGAATAGAAGCATAGGGTCCCAGATGAAGCGCCCCCCTAAGAATCGAGTCGGTTCA

TCGGATCGATTACATTGTATTTCATATTGATTAGATGAGTCGGAGATTCCCAATTCGAGAAATTGCTCAC

GTAACGAGATATTATCCAATCGGTTTTCCAATCTTTTAATATATCTTTGTCTCAACCTACCTAAAGCTCT

CTTATAACTGAAAAGATATCCTTTTTTCTCATACGATCTATTTTCACTATACTTAATCTTATTCAATTCG

AAATCCCGTTGGGGTATTTGATTCTGATTTTGGTAAAGGAGGATTAGATTATACAAATTATTGAATTCGG

ATAAGACTCTTATCGATTCATAAGTACCACTTCGCATGAAACTTAGACGCCAAGCCTTAGGGGACCAAGC

AATCTCACGCGATACTTCCGTCGGAATTAAGTCTATTTCGGGTGACTGTTTCATTTCGAAGTCGGTTAGA

GGATTAAACACCCCTTTTCTCGTAGATTTAGAAGAACGACTTGTATAGGTTATATCTGAACAGTACCTGG

GTTCAGTAGGAGAAGGAAAAGAAAGACTATTATTGGATTGACTTCTGCTTCTACAGATTTCTGAACATGA

AAAATCCTTTGAAAGGTTTTCTAGAACACCACACGCTAGGTTAAAGTCATTCTCTACAAGTTTATCAATA

ACAATGAAATTTTCTTTCTTTCTCATATCCATTTTGAACGAATCGCGAGCCGCTAATCCAGCCAGTAGCC

CTAGGATATGCGAAAATAGAGTGAATTCCTTAATTGTTGACTCGGTTATTGAAGGTTCCACATACCAGTT

AGACAAATGATAAAATCGCCTCTTTGACGCATTACTACCAATAAATAGAATATTTGTGGGATAAGTATCT

ATCAAACTATTTTTTAGAATAGCTTCTCCTATCCTCTGAGAAGAGATTTCGTATTCAGAACTGGATTCTA

TTCCATTGCCCATATAAGTAACAATTGAATGTTGTCTATGTGACGCTAATCCAATTGCATCACTACATAC

AATCTTTTTCCTTTTGGAAGTACCGATTAATAATGCTTCATTAGCAGAAAGGAATAAATCTCGTTTGCTA

TAACCCGTAGTTCCAGACCCAGTACCTTCAAGAAGAGGCGGATTAGCCTCTATTTTGAAGCCTTTGATAC

GTAAGAGAATTGACAATTCTTTCTGACGTTGACACCTGTTGGACTTTCGGAAATTTATCAATTAGTTTAA

CCGGTTCGGAGCTATTGGAGCTGGATCTACCCTTGCAGGTACATGAGTCGAAGCAATAACAATATTCTTA

CGAATGCGAGAATTACTGCGCCCATAACCAATACTCCTCAATATTGGGCAAAGTAAGAATCTGGGATCAG

CTTCTAGTCTATGATACGAGCGATGAACATTCAATTCATGAATATCTTGAATCCATATTGTACAGGGAGA

CACCTCTCTCGCTATTGCAAAAATGAGATTTAATCGGTGTACACTCTCTTTCGAGATGAAATTTCCATGT

ATATTATTGAAATATGATCGATTGTATAGCAACTTTCTTAGTGGTAGCCTCATCAACGGGAAGTAGGAAT

TGGATGCTACATCCCTAATAACGGAAGATCGTCCAGTTTCTGTGGGTCCTACTACCGGAATTCCTTTAGA

TGGTAATAATCCTGATTAGAGTGAGATAGGTATGTCATGACATGGCATATTTAGAATGCCTCTTCGTCTC

GTCGTTGCTGAAAATAGAATATTTCTCTCGGGGGCGGAAAGAGCCCACTTCTCCGCAGGATCCAACTTAC

GGATCTCGTAACTTAATAGATCATTTTGACGGAATTGGAGTAGGTATGCCAAAACATTAGATCTTTCTTG

TGGGAAAGGTTCATGATCAATCTCATTGCTCGATAAATCAGAATTGGAATTCAATTTCGACTCATACTTG

GAAATAATTTTATTCGTTACTAAATATTGAGTCAATAGTTCTTTCTTACTATTAAGGGTATCGGAGCTTT

CCCTACAAAGTATCCATGAATCTAGTTCATTTTTCACGAAGGAGAAAAAGATTATATTATTTATATAATT

CAAGAATCTCTTCAAAGAATAGATTAGTAGATCTTTCGTTTACATTTACCTTGTCGAAGGGGAATACATT

ACCTTTTTCAAATAGGATCCACGCATTGGGTCTATTAAATATCCAATAGTATCGAAACGTTTCCATGAAT

GAAGGGAATTAGAACCCGAAACGGCAGACAAATGGTGCTTGGAGAATGCAAGAACGAATAATATTGAGAG

AATAAGGTAAGATAAGATAGACTTATTGGAAAATTGAGATACTGACCATCCTGAATGTGACATCTTCGTT

TCATTAGTAATTTCTTTGAAAAGAAGAAGATCTATCCTGGATAATATGGTATTGATGGAATCAGTTTTGA

ATCTCAATTCTAGGCTTTGGAATAAATAAGCTTTGGCACCATCTATATCCTCAGCAATTCTTTTATAAAT

TCTAGGTAGATTATGATTCGAGTCATCACTTATTTTAAGTACTATTTCTGGATATGTTTCTCTAATCGGA

TCGTAGAAGTATCTCCACCGGTTAGGGGTAAAAAACCAAGGTATATACTCTCTGAATAGGCTCCATTTTT

CACAGATATTGTCTTTCCAAAAGATCCAAGAGATCTTATATTTGTTCAAATCTTTTGATAATTCATTGAA

ATTGATGAAATGGGATGGACGGATAGGCTCTTTACGAATATATGGATCTGCAAACTTCGTATCTTCGTGC

GGAACCTTCTTCCCAATCAATCCTATTAGAGATCTTGATGTTACATCGTTGCGTAATGAGAATCTTAGCG

ACCAGTAAAGCGTTTCTAATTCTTCTGGTTCCCAGAAATACCCAATAGATGGATCATTTTGATAGAATCG

ATTCTTGGTGGAAACATTCCCCGAGTCTGATCTATCTTCAATAGACTTCTCTGAATTGACTTGATCCAAT

TCCAGATTCTTAGGACAAGGTCGGGGTCGCCGATCCGCCGATGGATTAGAGTTTATCAACGTTTTTTCCA

TTTCCAAATAAAATCCATCGCTACTGCACGAAGATAGAAACGAATCTCTCGTTTCACGAGGAGATGAGTT

CAACTTCGACAGTAATCTTTTCAGATCTGAAATAGACTTAAAAAGTCTATCTGAATGAGTTAATAATAAT

GTTGCAGATTCATGCAGATTAGACAGAATAGGTTGAACTGTTGTGAGTACATGATCAACAGTTTCCCCTT

CTGTTCGTTTCGATAAATTGGGTGATAATGAATCCGACAGTTGAGACTGAATAGATGAGATGATATTAGA

TGAGATGACTTCATTATCGGAGCCCACATAGAAATTCTCTAAGACGTTGGAATAACTACTGCTACATCTC

CCAATAAGGAAATCCCTTTTGGTTCTCGGAATGAAATTGCTTCTAGCATAGTTCCATACAGGTAGATTAG

AGTGGTCTAGAAAGTTTAGTGTATTCACTTCATCGGAAATGTATCTTGAAATACTCTCACCAATATCTTT

ATTTGAACCTCTCCCACGACTTGAATTATCTAGAAACAGATTCCAATTCTGCCTCCCCGTAGTGGAAAGA

GCATCACTTGAAAATCCTGTTCGGATAGATTCGATGCGGGGTAATCCAACAAGAGGCGGATTCGCTGCGG

GTTCTAGTGAGATTGAAGAGCCTATCGCTTTTTTATCCACTAACAATCTGGACTCAATGAATAAACTCTT

TTTTCTCTCGAGAATTCTTTTGAGGAAAGATATCTGTTCGTCAATGTCAATATCGAGTAAACCCGATAAG

GGATCAAGCATCGAAAGATCTATATCGTTCAATTTCTCGATGCAATAATCAATCGTATCTATCAGAACTT

CTTGGCGAGTAACCTCGGTAACAATCATTTTGTAAAGAAATAAAACATTGAGAAATCGATGAGGATACTT

CTCGTTATTCTGAGTGGTGTTATTAATACTAGTACCAATACTATTTAGTAATTTGTTTCTCATTATTGAT

ACACCGCAAATCGATTTATCCAAGTCATACTTTATTTCTAAAAAGACTCTCCCGAAAGGGGAAAAAGACG

AATCTCTGGTTGTATCAAGCCATCTAGGCGCATTTGACTGAACATTCCTATACTCATCGATTCGGAAGGT

AATATACTCGTTCAACAAACGCTCTGTGTTATCTTTCCATTTCAATAATCTTTATTCAGTTGCAATTCTT

GTTACACCGGTGGATTCCCCGCTCCCCGCCCAGCCATCCAACCGATATTTGATTCGGAAGAAATATTCAC

TAGCTAATGCACAGAAATAGTCATATAAAAGAAGTGTGTATGTTGAGTAGAGAGGTATCAATCTATTTCG

TCCATACAACCTAACTAGAGAATATATTGAATGTATGTTATCTTTTCCTTTCAATTCATTTAAAAAAGTA

GTATTTTCAATTCTATTAGTTACTTCTCTAGGTATACCTAAAGATATTTTAAAATATCGTGGAAGAATTT

TATTGAGGTCAAAGTATTTGCTACTCGGCAACCCTAGTTTCTTGCCAAATATCCTAGTAAATGATAGATT

CTTTGTCATTTTCAATGGAAATCCTTTCCCAGATTTCTCATTACTATTAATATCAATAATTATTGCCCCA

TTAGAAATCGGATTCGATTCCTCAATTATCAAAATAAATCCAGTGAGTCCATTTATTAATTCATTTCTTA

TTTGTGAATAAGTGTGTAGAATAGGAGAGTCTCCCCCATTTTCGTGACAATCTAACCCGGATATACCATC

ACGAGACGACATTGTATTTTTACAAGATGGAAATGAAGACAAATAGGAAAAGGCCTCCCTCAATCTTGTT

GTTTGTAGTCGATCCAGATCTTGCTTGTTATGGATTTTTCAGGAGAATAACGAATCAGAATCATTTTGGT

AACAGTCACTTTTAATTTTATTTTGATAAAGTCCCACATGTTTATAGAATTTGAAAAACCTATCCCTCCA

TAATATCTGAATCCTCTCAGTCTCATCTCTGGATATGTCCTCGCCAGGGAGTGAATCCCTCACTATGCAG

ACCTTCCATCTACCTGAAACCAGAGGATTCATTGCACCATAACGAACTTGCTTTTCTTCTCTCGTCGAAC

CTGTGGAAATATCTTCGTTCGAACCTAAATAGTAAGAATCAGGTGTTCTTCTCTTCCCATCCTTTTCAAC

AGATAAAGATCTTTTGGATTGAAGAAAGTAGTAGGATAAGTCACCAGAATTTTCTGCTTGTTCTTTTCTT

ACTCCACCACCCCCATTAATTATTTTCGCTAATATAGAACTTCTTTCGATCGAACTTCTATCACTTAAGC

AATGCATAGAAATTGGTATTGTTAGTAACATTAGGATTTCCAAGGTGATGCTACTACCCCTCTTTACTGA

ATGACGCAGATTGCGTAGAAATAGTGAACTTAGAATCCATAAGTCAAATAATCTGATAAAAGGTTCATAA

CTAGACAATGGACCAATTAAAAATTCTTTGAGATGTTGGTTCTTCAATGATTCGAAGAAGTAGTCTAATC

TACTGATTTCTACTAACCCCGGAACTTTAGATAGAGAATATGGACTTCCTACTCTTTTTTTTCCCACCCT

TTCTACCTTATTTTCTTTTTTCATCTTATTCATATGTGATAGATACTATCTATTTCTCACATTTATTATA

TGGATAATCTTGAAAGATTCAAGATACGATGGAGTAAGTACTTCAAATAAGTATAGTGATTTCTATACAT

ATTCGTGTCCAAAACTGGAATTGGATCGGGAATTTCAAATCGTTATTGTTGAGGATACCTGTACTTACCC

TATCCACTTTTTTTTTTTTCAAAAATTTATCTATTCCAAGCAATAAGAACGAGTTATCTAATTGGATGGG

CGAACGACGGGGATTGAACCCGCGCGTGATGGATCCACAATCCATTGCCTTGATCCACTTGGCTACGTCC

GCCCCCTCTACTACTTGGCTCCCTGAACGTGAAAGGGAACAGGATCTATCTATTAAGCTATTAGGGTCCT

TCGATTGATACACATACATATTAGTTGTGTATATAACGAGACAATAGAAAATCTGTGAAATGAAGAACGT

ACTCCCACTCTATTCATTGGTAGATTACAAGCATTCTGTGAATTGGAATAGAAATATTTTTAATATTTAC

AGCCGCATAAGAGTATTCTAAGGATTCTTCAGAATTCAAGATTGGGAACTTATGATTGTAAGATTCTGAC

AAACCATTACCATTCTTTCTATTCGTTTTATCGAACAAACGGACACCAAACCTTTTAAAACTAAAAGGTT

TGGTATCCAGTTATACTGCATAACCAGACAGATATTATCCGTTTATAGAAGGAGCTTCAACAGAAGCTAA

GTCTAGAGGGAAGTTATGAGCGTTACGTTCATGCATAACTTCCATACCCAGGTTAGCGCGGTTTATGATA

TCAGCCCAAGTGTTAATAACACGACCTTGGCTGTCAACCACGGATTGGTTGAAGTTAAAACCATTCAAGT

TGAATGCCATGGTGCTGATACCTAAAGCGGTGAACCAGATGCCTACTACGGGCCAAGCAGCTAAGAAGAA

GTGTAGAGAACGAGAATTGTTGAAGCTAGCATATTGGAAGATCAAACGGCCGAAATAACCGTGAGCAGCT

ACGATGTTGTAGGTTTCTTCCTCTTGGCCGAACTTATAACCTGCATTAGCAGACTCATTCTCAGTAGTTT

CTCTGATCAAACTAGAAGTTACCAAAGAACCATGCATAGCACTGAATAGAGAGCCGCCGAATACGCCAGC

TACACCCAACATGTGAAAAGGATGCATAAGGATGTTATGCTCAGCCTGGAAAACGATCATAAAATTGAAA

GTACCAGAAATGCCTAGAGGCATACCGTCAGAAAAACTTCCTTGACCAATTGGGTAGATCAAGAAGACGG

CGGCAGCAGCTGCGACGGGAGCTGAGTACGCAACAGCAATCCAAGGACGCATACCCAAACGGAAGCTTAG

TTCCCACTCGCGACCCATGTAGCAAGCTACACCAAGTAGGAAGTGAAGAACGATCATTTCGTAAGGACCA

CCATTGTATAGCCATTCATCAACGGAAGCTGCTTCCCAAATTGGGTAGAAGTGTAACCCGATAGCTGCAG

AAGTAGGAATGATAGCACCAGAGATAATGTTGTTCCCGTATAACAAAGAACCAGAAACGGGCTCACGAAT

ACCATCAATATCTACAGGAGGAGCTGCGACGAAAGCAATGATGAATACAGAGGTTGCGGTTAGTAGGGTA

GGAATCATTAAGACACCGAACCATCCGATGTAAAGACGGTTTTCAGTGCTGGTGATCCAGTCGCAGAAGC

GACCCCATAGGCTTGCGCTTTCGCGTCTTTCTAAAGTTGCGGTCATGGTAATATTTGGTTTTCAAAATAA

TTAGTGATTCCCCAGGCTAGTAAGCTTGTTGATTCCCAGTATATCACGAAATTCTATCCGTGTCAACTAA

GATTGATTGAGTATCCGAAACTATTAGATATAGAGGCTATTTTTCGGTATCTTGAATATGTCCTATCCCT

TATTTCACAACGCGGCTTCCCTTTTTTAGAATAAAGACTTTTTGGTTTTTCCTCTATGTCTCGTGGGAAG

GAGGGAGACTAACTCTTCATTGATCATCCATTGAGAATTGAACGATATTGATTATCGATCACCCTATGAA

TATGAAGCAACGTTCCATTTCGACGAATGGGAGTACAACATTCTGTCTCTGATACAATAGTTTTTATTAG

ATGAAATCTCTCTAAAGTAGTTGGAGGGTTGTAGCAAGTAAGGTAAAAATGGTGAGTAAGAAAGGGAAAG

TCGATTTTGATCGAATCTCTTCTGTGGCTTGAACTTAAAACTCGGCGGATTCAAGTGAAGTGTCGGAGTC

TCATTCCAGGTTTGGAACTGGGAGAAGCTTCTCAAATTGTAGTGATCTTTCAGATCATACAGCTTCCTCT

ATGTGCGTCCCAATCGATTTCAGTTCTCCGAATAACTAATCGATATTGCATCAAGCCTTTCCCCGATGGA

CTTTCCAACTCCACATTAGTTTCTTTCCCTTCTATAAGATAAAGAGTCTAATAATTAATAATCTAGTAAA

TAATTATCAATCCTCACTTATGGCTTAGATATCTCTTATTCATCGTCCAATTTTTACTTATCCATTTGTT

TATGGCGTATTCTGATTCCCGATAACCCGCGCCCTGGTTCCAATCCACAATGAAAAGATTGTGGATTGAA

ACAAATCTGAAACTAACGGAAATGGGCAAAAGCTTTGTTAGCTTCCGCCACTTTATGGGTCTCCTCTTTC

TTCCGTACGGCACTACCAGAATTTCTGGCAGCATCCATTGATTCATCACTCGATCTTAAAGCCATACTTC

GACCTGAACGTTTTCGACACGCGATCAATAACCATCGGATAGCCAAAGCTTTTCCTTCTGCAGGTACCAC

TTCAACGGGAACTCGATAAGTCGATCCACCTACACGTTTGGATTCTGTTACTACATCGGGAGTTACCCCA

CGTACTGCTTGTCGTAGAACAGACAGTGGATTCCTATTTGTCTTTTATCTAATCCGCTTCATAGCCCGAT

AAGGAATCTGATAAGCTAATGATTTTTTTCCATTCTTAAGAATACGATCAACCAGCATGTTTACTAATCG

ATTACGATAAATCGGATCCGATTCTATATTTCTCTTTCTGTTCGCTACACTGCTCCGATGTAACATGAGT

TTGCAGATATGTCAGATTTCAATCAATTCTTTTATCCCAATGGTATCTTAGAATATTATTTTGGCTTCTT

CACTCCATATTGTAGGGTGGATCCGCCGGTTAGTCGAAGATCTCCCTCCGAACTGCACGTACGACTTTCA

TCGAATACAGCTTTCCATATGATTGAATAGAAACTATTGAAGTGATTTTGAACCACTTTTAGTGAATCAT

ATTTACTCATTATGCATTGAGTATCCGTTTCCTCTTCATTATTCTAGGAATAGAATAAAGTCAAAGTTTA

GGAATGGAAAAAGAAAATCTTGCATTTCAGTTATCTCACTAAGAATGTCCGTGGGTTTATTGATCCAATT

ACCGAATGTTCACAAAATCTTCACCGAATCTCCATAATAGTAGTCTGAACCCGCTCCAAGAGGAAGAGAC

ATTCTAAGATTTTCTAGGTAGGAGTCCAGGTAAAACTCAACTTACTGGAATGTAATACCTTAGACACCAA

GTTGTTTCACACAAATAGATGGATAATAATCAATCTTTGTAATAGCAGGCTTCAGTCCCCTGGCAATGCT

GGGTCGGCTACACGTTTAACATATCAGAACAACTGATACGGAATCATTGCGATGATACAAGTTGCGACAA

TGTTCTGCAACGCACTAGAACGCCCTTTCTTACGATCCTTTACTCCTACAGCATCTAAGGTTCCTCTAAC

GATATGATACCTCACACCGGGTAGGTCTTTAACCCTTCCGCCTCTCACAAGGACCACCGAATGTTCCTGC

GAATTATGGCCAATACCTGGTATATAAGCCGTTACCTCGAACTTGGAGGTTAATCGAACTCTGGCGACTT

TACGTAGGGCAGAGTTAGGTTTTTTTGGTGTAGTTGTGGAATAGTTGACAGATGAGTCAGTTTCAATGTC

ACTATACAGAACCGTACATGAGATTCCCATCTCATACGGCTCCTCGTCATTCAATTACTCTTAAGAAAAG

GAGTACAAGATTCTTTTCAGCTGTTCTCAGCTACAAAAGAATTTACAAAAAAAAAAATTAGATTCTTTTT

AATTCATTTTCAAATCGTTGCTTTTATGCCCCCCTCATTTTCCGAATCTCAGTATTATTAATAAGTAGCA

CGGATAGATAAATGAAAAATCCATCAAATTGATGAGTAGATTCGCTAATGAATTTTTTTGTTTTCATGTG

AGTAATATGAAACGGATCAAATATAGAGGAGATTGACGAGTTGGTATAGGCTTATCCATATCATTAATTA

CCCTTCGATAAGGAATCCATTCTGAAATGAAGACAGCTTCGATATCTGACTTTCGTTCTTTCTTTCGTTC

CAACGAGGCTGCCTGAGAAGGATTCGGTAACCTACCTAACTACCTAATAAGTAAGTGAGTAAGGATACGT

ATCTTTAATGGGATAGGATCCGATGACTGCTTGAGGCCCGCTAGTAGCGATGATGCTGAAGTAGCAGTGA

GAAAGGAAACCGAGGATATATATGAAAAAGAAAAGAGGTTACTTGTCTCGCTGATTCTGGCTTAGTTAGC

TTGTTCCGTGACGAGCGACTAAGTCAAGTCCTGCATCCTATTTCCTCCCTCTTCCGTGGACCGGATCAGA

AGTCCAGGTTATGTGGAAAGAAAATTGTACCACGAGAGCTCGAGGAGGTCAAGCTGTTATTACTACCAAT

TGTTACTACCAATGCATGACACAGATTTTTCTAATGTTGTGTACTCCAAGGTTAATTCAGATGAATGGCG

AGGACGAGTATTTCATCATAAAGATTATGAATAGGGAAAGAGGAACGAAAGTGTAGTAAAAAGAAAGTTA

GTAATGCCGATTTTAGACGGGTTTAGTAATATCAGTTGCATAGCCAGTCCCGGTAGGATGCCAATGTACC

AATCTAGTATAGTATAGTTAGAGACTGTATAGGGTTACAAAGATGTTGGGTAGAGGTAGCCCCAACTCTT

TTGAAGCATGTCTGTGAGAAATCTTTTAAATCGAAATTGGGGACTTGCCAGTTCGAGACTGTCTTTCAGT

TTCTTTCCGAGTGGGGTTAATAAATAGGCCAAGCACACTGGGTAAACTCTCACCTCCCTCTTTCATATCC

CTATGGCATGGGACCTATAGAAAATATTTTGAATAGAAAAGAAAGAAAGAGCTCTGTTTATCATCCGTAT

CTGCTTCTGTTTGTTCCTCTCCCTCCAACTACGCTGGGTTTTCTATATCGATCTCACAGGTGCATCCTAG

GACTGAGAAAACATCTCACCGGAGCATAACTTGCCAAAATTGGATTGAATAATAAGGTAACGGATTTTGT

AAAGCCATATCCCACGCTCTGAATCAATGAGAATCCCTATTTTCGATGGGGCTTTTCTTTTATAAAGAAA

TAAGGAAAGAGCATCTCGAATCCCTCACTCACTCGTTCGCTTCTTTCAACAAATAACGTGGAGAGAAATA

AATTCTAGCTCCAGATTAATCAGCCGCATCAGGATAGTCTAATCCAGTTTCTCGACCATCCGAGTTGGTT

AATTCTTAATTCCACCGCGGGTGAGTGATCATTTGATGTAGGAATAGCAAGATAGGGAACCCAGTGGTAG

AGTAGAATGGTGTGAGTCATCAGTTCGAGCCTGATTTCTTTAAACTTAACCCAAACGTTTCTATTCCCGT

CTCCCTCGATGGGGGGGGGGGTAAGAGGCTTGTGGGATTGACATAAAGCGGTAGGAGCGGATACACTATG

GGTGAGCTTCAAGCTAATACGAAATGAAGAAACCCAAGTTGTGCCTGGAGATAGGAGACTATTCTCAATC

AGCTTCATCTATGGCAATTTCGAATCAGCTTCATCTATGTAGAAAGAAGCTATAAGTGACGCAACTACGA

ATCTCATGGAGAGTTTGATCCTGGCTCAGGATGAACGCTGGCGGCATGCCTAACACATGCAAGTCGGACG

GGAAGCATCCTCATGGTGTTTCCAGTGGCGGACGGGTGAGTAACGCGTAAGAACCTGCCCTTGGGAGGGG

GACAACAGCTGGAAACGGTTGCTAATACCCCATAGGCTGAGGAGCGAAAGGGAGGGATCCGCCCGAGGAG

GGGCTTGCGTCTGATTAGCTGGTTGGTGAGGCAGTGGCTTACCAAGGCGACGATCAGTAGCTGGTCTGAG

AGGATGATCAGCCACACTGGGACTGAGACACGGCCCAGACTCCTACGGGAGGCAGCAGTGGGGAATCTTC

CGCAATGGGCGAAAGCCTGACGGAGCAATGCCGCGTGGAGGTAGAAGGCCCACGGGTCGTAAACTCCTTT

TCTCGGAGAAGAAGCAATGACGGTATCTGAGGAATAAGCATCGGCTAACTCTGTGCCAGCAGCCGCGGTA

AGACAGGGGATGCAAGCGTTATCCGGAATGATTGGGCGTAAAGCGTCTGTAGGTGGCTCCTTAAGTCCGC

TGTCAAATCCCAGGGCTCAACCCTGGACAGGCGGTGGAAACTACTAAGCTAGAGTACGGTAGGGGCAGAG

GGAATTTTCGGTGGAGCGGTGAAATGCGTAGAGATCGAAAAGAACACCAAAGGCGAAGGCACTCTGCTGG

GCCGACACTGACACTGAGAGACGAAAGCTAGGGGAGCGAATGGGATTAGATACCCCAGTAGTCCTAGCCG

TAAACGATGGATACTAAGCGCTGTGCGTATCGACCCGTGCAGTGCTGTAGCTAACGCGTTAAGTATCCCG

CCTGGGGAGTACGTTCGCAAGAATGAAACTCAAAGGAATTGACGGGGGCCCGCACAAGCGGTGGAGCATG

TGGTTTAATTCGATGCAACGCGAAGAACCTTACCAGGGCTTGACATGCTGCGAATCCTCCTGAAAGAGAG

GAGTGCCTTCGGGAACGCGGACACAGGTGGTGCATGGCTGTCGTCAGCTCGTGCCGTAAGGTGTTGGGTT

AAGTCCCGCAACGAGCGCAACCCTCGTGTTTAGTTGCCACTACTAAGTTTGGAACCCTAAACAGACTGCC

GGTGATAAGCCGGAGGAAGGTGGGGATGACGTCAAGTCAGCATGCCCCTTACGCCCTGGGCGACACACGT

GCTACAATGGCCGGGACAAAGAGCCGCGACCCCGCGAGGGCAAGCTAACCTCAGAAACTCGGTCTCAGTT

CGGATTGCAGGCTGCAACTCGCCTGCATGAAGCCGGAATCGCTAGTAATCGCCGGTCAGCCATACGGCGG

TGAATCCGTTCCCGGGCCTTGTACACACCGCCCGTCACACTATGGGAGCTGGCCATGCCCGAAGTCGTTA

GCTTAACCGCAAGGAGGGGGATGCCTAAGGCAGGGCTAGTGACTGGAGTGAAGTCGTAACAAGGTAGCCG

TACCGGAAGGTGCGGCTGGATCACCTCCTTTTCAGGGAGAGTTAACGCCTCTTTGGCACTCGGGTCTTAT

ACGCACCGTTCCAAACCTCGAAACGAGAAAATCCACACATCTAACAGATGGGATTCTGTTTTTGCGGTGA

AATAGGACCAAGTCCATGAGCTTATTCTCTCAGGTCGGAACAGGCTGAGAGTAATCCCATACTTCCTCGG

GAAAGTACGAGGGACGGATATGGGATGGGGGTTCCCCCGCTTTCAGTGTTGCAGGCCTCCCCCTATCATA

TTAGGTTAGGGAGGCCCGCATGACGGGCTATTAGCTCAGCGGTAGAGCGCGCCCCTGATAATTGCGCCGT

TGCGCCTGGGCTGTGAAGGTTTTTATACACACGGGTAGTCTAATGTGCCCATCGGCGCCTGACCCGAAGA

TGTGTATCATCCAAGGAACGTTAGCATGGCGTACTCCTTCCATTCTTGACTAGACTCGGTCTCAGGACCA

AACTACTCTTCAGGAAGAGATAGATGAGGCGATTCAGGTGAGATCTAATGGAGATTCAACCCCCCATTCA

CTAGTGGGATTCGGGCGATCCGGGGAGGACCGATACCGCTAACAGATCCCCCTTTTCGAGAATCTATACA

TTCCTTATCAGTGTATGGATGGCTATCTCTCGAGCACAAGCTGATAAACTTCAGGCTAGATGTGAAAGAC

GGAGCACCTGATAACGCATATTCACGGACCAGGAACTACGGGATCACCCTTCTCATTCTAGGGTGACGGA

GGGATCATACTATACGAGCCTTTTCTGCTTCCCTTGAAGGTCCATAGAAGCAGCAATCGATGGAAGAACT

TATACGGGTAGTCCTAGAAAGACCCCTCGGAGAGGCGAGGATATTGGACCTAGACATAGGAAGAATGCCT

GATGGAAGAAACTCCCCAGTATTCCACCCAACCGACTAATCGGGTATTCCAAATAGCTTACAATTCTATG

TAACGAGATGTCTTTGTTCATCCTTCAATGATAGGGGGAGCAGGTTCGAAGAAGGATCCTAGAGTGTACA

GGGTTGAGCGTCGAGGGTCTCTCGACGCCTTTCTCTCTCTTCCGTCGAAGTATCTTTCCAGAAACTCGCC

GTTAACAAGGAAGGAGGGGATGGGGGAACAAGCACACTTGGAGAGCGCAGTACGACAGAGAGTTGTATGC

TGCGTTCGGGAAGGATGAGTCGCTTCTAAGAAAGAATCTATTAATTCTCCATTCTGATGAGATAATAATA

AGAATAGTATAGGTGCGATTATTCACTTCACGGGCGAGGTCTCTGGTTCAAGTCCAGGATGGCCCAGCTG

CGCCAAGGGGAATCAGGAGAAGCATCTGATCAGTTCACGTATGCTTTACTTTTTACTTGGCCCGAGCACA

GGGGATATAGCTCAGTTGGTAGAGCGCCGCCCTTGCAAGTGGGTCGTTGCGCTTACGGGTTGGGTGCCTA

ATTGTTTAGGCGGTAATGATAGTATCTCCCACCTGAACTGGTGGCTAACTCTTCCCAAAAATAGGGGGGA

GGACCAAAACATGCCACTGAGAGACTCTACTGGGACAAAGATGAGCTGTCGTGTAGGGCGGGGTAGGATG

GGTTGTTGGTTAGATCCATTACGGATCGTACATGGACGATAGTTGGAGTCGGCGGCTCTCCCGGGGCTAC

CTCATTCGGATCCCTGGGGAAGAGAATCGAGCTGGCCCTTGCAAACAGCCTGATGGACTATCTCTCTTCA

ACTCCCTGGGCACAATGTAGCGGAAGGAATCAAGATCCATGGACCGACCCCATCGCCCCCATCCCGTAGG

AACTACGAGATCGCCCCAGGGGTGCTGAAGGCAAGGCATCCGGGGGTCACAGACCGACCATATAACCAGT

TCCAAGAAGTAGAACAAGCTGTCTGCTTCCGTTGGTGGGAAGGGTCGGAGAAGGGCAACTACTCAGCATT

GAGACTGAAAAAGAGTCGAGCAAAAGAGGGAAAGGGCAAGAGTCTTTTTTGGTTCTCTGGCAGATCGGGA

GTATCTAGCTGGAAGAACCCTTAAATGGGATCTCTATTCGGCGCCTCTCGATTCGGGGATAGTTGCTCCC

TCGGAGAGCACGGTACAATGAAAGTTGTAGGCCGTGTTCGGAGGGGAGTCATTGTCTATCGCCGGCCTCC

GTGGTAGAATCATTCAAGTAGGCCTGAGAGACGGTAGCTTACCCTGTGGCGGATGCCAGCGGTTCGAGTC

CGCTTATCTCCAGCCTGTGATCCGAGTCAATGGAATCGCACACACTAGTATGGAAGAATCTTGATCCCCA

GTGGGCGGGGCAGGTTGACCCATGATCCATTCCCTATGGACGTTGATAAGATCTCCGTATGTAGTAGCAC

CTTGAAGTGGGTGGTGTAGCATTCAACGACGAGGTTCAAACGAGAAAGGGCTTACGGTGGATACCTAGGC

ACCCAGAGACGAAGAAGGGCGTGGTAAACGACGAAATGCTTCGGGGAGCTGAAAATAGGCATAGATCCGG

AGATTCCCGAATAGGTTAACCTTCTGAACTGCCTGCTGAATTCATAGGCAGACAAGAGACAACCCGGCGA

ACTGAAACATCTTAGTAGCCAGAGGAAGAGAAAGCAAAAGCGATTCCCCCAGTAACGGCGAGTGAAATGG

GAATAGCCTAAACCGTGAAAACGGGGTTGTGGGAGAGCGATGAGGGCTTTGTTTTGCTAGGCGAAGCAGT

TGAGTACTGCACCCCAGATGGTGAGAGTCCAGTAGCCGGAAGTACGGCTGGCTTACGCTCCAACCCGAGT

AGCATGGGGCACGCGAAATCCCGTGTGAATCAGCAAGGACCACCTTGCAAGGCTAAATACTCCTGAGTGA

CCGATAGCGAAGCAGTACCGTGAGGGAAAGGTGAAAAGAACCCCCATCGGGGAGTGAAATAGAACATGAA

ACCGTGAGCTCCCAAGCAGTGGGAGGAGAATCGGATCTCTGACCGCGTGCCTGTTGAAGAATGAGCCGGC

GACTTATAGGCAGTGGCCCGGTTAAGGGGAGACCCCCCGGAGCCGTAGCGAAAGCGAGTCTTGCTGGGGC

AATTGTCACTGTTTATAAACCCGAACCTGGGTGATCTATCCATGACCAGGATGAAGCTTGGGTGAAGCTA

AGTGGAGGTCCGAACCGACTGATGTTGAAAAATCAGCGGATGAGTTGTGGTTAGGGGTGAAATGCCACTC

GAACCCAGAGCTAGCTGGTTCTCCCCGAAATGCGTTGAGGCGCAGCAGTTGACTAGACTATCTAGGGGTA

AAGCACTGTTCCGGTGCGGGCTGCGAGAGCGGTACCAAATCGAGGCAAACTCTGAATACTAGATGTGACC

TCCAAATGCGGAGGGAAAAAGGGTCAACCAGTGAGACGATGGGGGATAAGCTTCATCGTCGAGAGGGGAA

CAGCCCAGATCACCAGCTAAGGCCCCTAAATGGCCGCTCAGTGGTAAAGGAGGTAAGAGTGCAAAGACAG

CCAGGAGGTTTGCCTAGAAGCAGCCACCCTTGAAAGAGTGCGTAATAGCTCACTGATCAAGCGCTCTTGC

GCCGAAGATGAACGGGACTAAGCGGTCTGCCGAAGCTGTGGGATGTCAAGACACATCGGTAGGGGAGCGT

TCCGTCCCAGGTAGAAGCACCAGTGTAAGCAGGTGTGGACAAAGCGGAAGCGAGAATGTCGGCTTGAGTA

ACGCAAACATTGGTGAGAATCCAATGCCCCGAAAACCTAAGGGTTCCTCCGCAAGGTTCGTCCACGGAGG

GTGAGTCAGGGCCTAAGATCAGGCCGAAAGGCGTAGTCGATGGACAACGGGTTAATATTCCTGTACTGCC

CCTTGTTGGTCCCGAGGGACGGAGGAGGCTAGGTTAGCCGAAGGATGGTTATCGGTTTAAGGACGCAAAG

TTAATAGACCCATCAAGGGTAATAAGGGGTAGAGAAAATGCCTCGAGCCAACGTCCGAGCACTAGGCGCT

ACGGCGCCGAAGTAACCCACGCCACACTCCCAAGAAAAGCTCGAACGACCTTTGACAAGTGGGTACCTGT

ACCCGAAACCGACACAGGTGGGTAGGTAGAGAATACCTAGGGGCGCGAGACAACTTTCTCTAAGGAACTC

GGCAAAATGGCCCCGTAACTTCGGGAGAAGGGGTGCCTCCTCACAAAGGAGGTCGCAGTGACCAGGCCCA

GGCGACTGTTTACCAAAAACACAGGTCTCCGCAAAGTCGTAAGACCATGTATGGGGGCTGACGCCTGCCC

AGTGCCGGAAGGTTAAGGGAGTCGGTGACCTGATGACGGGTAAGCCGGCGACCGAAGCCCCGGTGAACGG

CGGCCGTAACTATAACGGTCCTAAGGTAGCGAAATTCCTTGTCGGGTAAGTTCCGACCCGCACGAAAGGC

GTAACGATCTGGGCACTGTCTCGGAGAAAGACTCGGTGAAATAGACATGTCTGTGAAGATGCGGACTACC

CGCACCTGGACAGAAAGACCCTATGAAGCTTCACTGTTCCCTGGGATTGGCTTCGGGCTCTTCTTGCGCA

GCTTAGGTGGAAGGCAAAGAGGGTTCCTTTCCGGGGGGGCCTGAGCCATCAGTGAGATACCACTCTAGAA

GAGCTAGAATTCTAACCTTGTGTCAAGAATTACGGGCCAAGGAACAGTCCCAGGTAGACAGTTTCTATGG

GGCGTAGGCCTCCTAAAGGGTAACGGAGGCGTGCAAAGGTTTCCTCAGGCTGGACGGAAATCAGCCTTCG

AGTGCAAAGGCAGAAGGGAGCTTGACTGCAAGACCTACCAGTCGAGCAGGGACGAAAGTCGGCCTTAGTG

ATCCGACGGTGCCGAGTGGAAGGGCCGTCGCTCAACGGATAAAAGTTACTCTAGGGATAACAGGCTGATC

TTCCCCAAGAGTTCACATCGACGGGAAGGTTTGGCACCTCGATGTCGGCTCTTCGCCACCTGGGGCGGTA

GTACGTCCCAAGGGTTGGGCTGTTCGCCCATTAAAGCGGTACGTGAGCTGGGTTCAGAACGTCGTGAGAC

AGTTCGGTCCATATCCGGTGCGGGCGTTAGAGCATTGAGGGGACCTTTCCCTAGTACGAGAGGACCGGGA

AGGACGCACCTCTGGTGTACCAGTTATCGTGCCCACGGTAAACGCTGGGTAGCCAAGTGCGGAGCGGATA

ACTGCTGAAAGCATCTAAGTAGGAAGCCCACCCCAGGATGAGTGCTCTCCTACTCGTACTTACTTGGGAG

ACTCTAGACACAGAAAAAGCCGGGGCAACGACGGATTCTTCGTCCCCGCGAAGCGTGAAACGACCGATGT

CTCTGATTTGAGAACCCGAGATAAGGTCACGGCAAGACGAGCCGTTTATCACCACGATAGGTGCCAAGTG

GAGGTGCAGTAATGTATGCAGCTGAGGCATCCTAACAGACCGAGAGGTTTGAACTTTGTTCCTGCAGAAC

CTGATCAATTTGATCAGGCAATGCCACCTATTATTCAATTGTCTGACAGTATCAGCCTCGAAACTGATCT

AAGAATCTAAGAAAGAGTTCCGTCCCGCTTCTCTGTCGATCCAAGGGATGGACGGAGAAGCGGGTCAGGG

GATTGTTCTCTACCTGGAAGGTGCACCTTTCCCTTTGGTGTGCCTTCCGGACTGGAGTCGTAGCCTAGTA

AGAACTAATCAATTCTTCCCCATTCTATGCTACTCCTCGTTCACGGGTTGATATTCTGGTGTCTCAGGCG

TGGAGGAACCACACCGATCCATCTCGAACTTGGTGGTGAAACTCTACCGCGGTAACGATACTGCAGGGGG

GGCTCTGCGGAAAAATAGCTCGACGCCAGGATGAAATAAACTAGATAAAAAAAAAAAAAGGCTGAATGCC

GTTTATTCTCGTAACGGTCGTCTCTATCGAGAACCCCATCTAGCAAATCCTTCCTTTCCTCTTTTAGTGA

GAGGAAAGTGCCCTACCTTTCTTTTCTCTGAGGGAGAATCCTAAGCTTACGCATCTTCACCAACCCGTAA

TAGATGGAGAGATAAAAAGTTGGTTCTATTCCAGTCTATTTCAGAAAAGTGGTTCCTGGAACGGATCCAG

TGGAGGCGGGGCCTGTAGCTCAGGGGATTAGAGCGCGTGGCTACGAACCACGTTGTCGGGGGTTCGAATC

CCTCCTCGCCCACAATCAATCATCCCTAAATGTATGGGAGTCGGCATGTAATTTCGAGCGTAGACCAAAG

CCGAGTAGAGCTTGATCCTCGATTCAAATTCTCAGTGATTGGCGAGAATAGAAAGAAGAGATAGGAGCAT

TCTATTCATCTATTTAATTTATATGAATTATTTACATTCATTCTAAAAATTAGATTATATGAATTATTTA

CATTCATTCTAAAAATTAGACTGGTTAGATACTTCTAACCAGATACTTGATAGAGGGATAGGATTTTGAG

TCCTTCACTTTCTTCATTTCCAAAAGAAGAGGGATAGGATTTTTAGTCCTATCCCCAGATAAAGCTATAA

CTACTAGGATTTTTAGTCCTATAGGATTTTTAGTCCTATACCCAGATAAAGCTCTAACTACTAGGATTTT

TAGTTCTATACCCTGGATAAAGCTCTAACTACTAGGATTTTTAGTCCTATAGGATTTTTAGTCCTATACC

CTGGATAAAGCCCTAACTACTAGGATTTTTAGTCCTATAGGATTTTTAGTCCTATACCCTGGATAAAGCC

CTAACTACTAGGATTTTTAGTCCTATAGAATTTTTAGTTCTATACCCTGGATAAAGCTCTAACTACTAGG

ATTTTTAGTTCTATACCCTGGATAAAGCCCTAACTACTAGGATTTTTAGTCCTATAGGATTTTTAGTCCT

ATACCCTGGATAAAGCCCTAACTACTAGGATTTTTAGTTCTATACCCTGGATAAAGCTCTAACTACTAGG

ATTTTGATTTTCAGTCCCACCCCCTGGATAAAGCTCTAACTACTAGGATTTTGATTTTCAGTCCCACCCC

CTGGATAAAGCTCTAACTACTAGGATTTTTAGTCCCATCTCACGTTCATCTTTTCTTATACCACTCACGT

TCATACCTCAGCCACTCTTTTAGTATCTCTTTTGTTTGTAAGACTATTACTAGGGTTTTGAGTCTCGCTC

CAATATCTTCGGATCTGAGGATTTGCCGTCCCAGCCTTAGTTAGGGAAGAGAGAGGATAAAAAACGGTTT

CTTCTTATTCGAAGACTTACTACCTATCTTTGAACCTCCAACTCTCGAGGCAGGAGAACCTAGTAGAGTT

ACGTTCACCATTTCAATTCTACAGATATATATATATGCTTGTCAACCGTGCTGAACTGAATTTTCCTTTT

TTCTTTCCCAACAACGAGGAATTCTAGTCTCAATAGTCAACAATCCAAGGATTTGGAATCCAATTTTCCA

GATTGGATACTAGAGAGGCTAGAATTCTTCAAGGATTTTTATTCCTCTTGATAGTTTGGGAGACACCAAT

AGGACCCGCTCATCTCTCGAATCAAAGGAAAATTTACAGTGCTCCTTTGACTCGAGAGGACAAGCATAGA

AATCGCCCGAATAGGGATTTCGGATCCTATTGGTGAAAACAAGAAGTCTTTCGACTTCTTCCAGAAATGA

ACTCTGGAAGCCTCGCGGAGGATTCGAACCCCCGTCCTCTGCAGGACTATATTTTGAGTCTAGTGTGCTT

ACCTTTCTCTCGAGGCAGGAGAACATAGTAGAGTTACGTTCACCATTTCAATTCTACAGATATATATATA

TGCTTGTCAACCGTGCTGAACTGAATTTTCCTTTTTTCTTTCCCAAACTTATCAAATATAAGACTTCATT

CAGGTTTAAGGAAAGCCCCCGGACCTTTTTAATTACTCATCGTTTCTTCGTAGGGTGGTAAGGTATCCCT

TAGATACTGGGATGGTCGAGGGTTCGACTGCCTCCTCGCCCACAATCAATCATCCCTAAAGGGGTGATCA

ATTCTCCCTTCTTACAGAGAATTTTATCACGATCTAACAAGCCCACGTCTCTCTCGCGAGCACATCTTTT

CTTCATTATCAGAATAATGATACCATAGGAAGAAACAAAAAAGAAGGGCATTTTTTTTTCGCCTAGATAC

TTAAATGTAGTAGCAGGGGTTGTTACTGCACAACCCCAATTGTGCATCGTGCGGAAATACTTATATCTCC

TCCGGAATAGACGAGTGATCATTTTCCTAGCAAGTGATTCTGGGTGCGAAAAGACAAATACAAGCTAGAT

AGGAGAATGTCAGGATCAATTCCCGAAGAAGATATAATTATTTCATTATAAGTTGCAGAAACAGACTAGT

TGGGACAATAGAACCGGCTTTTAATACACAAATCATTTGAAATTTGAAAAGGAATTTCGTGTCACAACTT

GAAATGAGTCTAAAATAAGGTATTCTGTGTGATCCCGATAATGGGATCTATTAATATACCCGATAGGATT

GATGCTAGTGCACAAATAATCATAGCTATTTCGATAGAACTTTTCGAAATTGAAGTTGATGAAGAAACTA

ATGAATTTTGTATATAAATTGTGGATGTGTCGCTCCTCTCATTCTTCCCAGTGAACATTAATTTAATTAT

TTTTAGATAATAATATATAGAAATGACACTTGTGACGAGCGCTATCGGAACTGATGGGTACGAACCAGCT

TTCCATCCATGCCAAAAGAGATAGAGTTTACCAAAAAAACCGGATGGTGGAGGGATACCCCCTAGGGATG

GTGAACGTAGAGCTGGAGAGAATGTTAGAACAGGATCCTTCATGTATAATCCCGCATAATCCCTAATATT

ATCAGTTCCGGTTCGTAAACCAAATGAAGTGATACGAGCAAAAGTTCCTAGATTCATGAGTATATGAATG

AACGTATAAGTTATCATACTTGCATAACCATTCTCGGGGTCTGCAGCAAGTATTCCAATCATAATATATC

CAATTTGGCTTATAGAAGAATATGCTAGCATACGTTTCATGCTTATTTGAGTAACGGCAATTAGATTGCC

TAATATCATGCTAAGAGTAGCTAATACCCCTAAAGCGATATGCCATTCACCGGAGAAATATGGGAAAATA

ATACCGAAGAGTCGTGTAGATAAAGCTAGAGCTGCTACTTTAGAGGTAACAGAAAAAAAAGCAACGACTG

GTGTAGGAGAGTTAGAGTCGAAAAGAAGATTTTCGATCTTCCCGCTCATTCAGAACCGTGCATGAAATTC

TTACTTCACACGGCTCCTGGTTCATAAGAGATTTCTAACTAGTATTGCTCCTAGAACCTTCCTCGTGTAT

GTTTCAAATCCATTTTTCCTTGAATAATTCATAATCATTCAATATGAGTACTAATTGTTAACTTCTCGAG

GAATCCTTCATCATTTGTTTAGATTACCCACCAGTAGTGTAGTTTCGTTTCGGATTCTTGCTTGTTTGTT

CCTGAAAGACATATTTCATGTTTGTAGACATCACGTTATAATAATGCAAACATATTTGATTAGCATCCAT

GGCTGAACGGTCAAAGCACCCAACTCATAATTGGCGAATTCACAGGTTCAACTCCTGTTGGATGCAAACA

AGAAACAAACGAGGCAAAAGGGAACACGTCTGAATAATTAGGTACTGCAGATAAAAAAAAAAACTTGAAT

TGAACCCTCTTACGGTAACAAATAAATTAATAAACTATACAGGAACTATAAGAAAAAGGAAGAATTATTT

ATTTTATATAGATGGTATGGAGAAGCATAAGTTGCCACTTATTTGAAGAAGTAAAAAAAAAAAAAGGGCA

AAAAAGATATTATGGATAAATCAAAAAATCAGGTGCTTACTGAAAAATCTATTCGTCTGTTGCAGCAAAA

CCAATATACTTTTGACGTAAACCCAGAATTGACTAAAAGTGAAATGAAAGATTGGATTGAACAATTTTTC

AAGGTTAAAGTGAAGGGTATGAATAGTCGTTGACTACCGGGTCGAAGAAGAAGACAAAGGGGTAATAAAC

TGGGAACTTCGGGTTCCGTACGCCGCAAAAGAATGATTGTTACACTTCGAAATAATGATGTTATCCCACT

CTTTTTAAACTAATACTTTTTTTTTTTTAACCATCTATTAAACTAGACCGACATTTCATAAGAAGAGGAA

AAAGAAGTATGGCTATATGACTATATAAGGCCTATACCCCCGGCACACGCAACCGGGCCATTTTACGTTT

CGGAGAGGCAACGAGGTACGAACCCGAGAAGCAGTTAACCTATCGTAAGATATCCAAAAACGGACGTAAT

AATAGGGGGATTGTCACTAGTAGACACAGAGGGGGCGGTCACAAGCGGTTATATCGTAAAATTGACTTTC

GACGGGACAAGATAAACATTATTGGTAGAGTAGCAAGTATTGAATATGATCCCAACCGCAACGCATATAT

CTGTTTAATCAATTACATAGATGGCGATAAAAGATATATTTTGCACCCTTGGGGGATAGGGGTTGGAGAT

GTTGTAACATCTAGCCCTGAAGCATCTGTTTCAAATGGAAATGCCCTACCTCTGAGTGCGATTTGATTAT

TTGATTCACGTATTCGGAAAGTAATCGATTGGGCTGGAGACTGAGCCCATGAACCTAGCACTAATTCAAG

ATTGTTAAATCTTTTGGAATAAACCTCATTGGGGCGACTAAGGAGGAACAGTAGCGGGTGATAAAGTCTA

ATAGCCTTTAAATACCTATTAACTTGCAAAGGTAGGATAATACGGAGATAGATAAATAATCTTGAGCTTG

AAAAAACGAGCGGAGGGGCAATCTTTGTTCATATTCAATGTGGACGAGGTATGGGTAACTCACAACATTC

GATGTGACGGTCAGAGGCAGTATCGAAGCTATAGAGTGAAATAAAAGTAAGAATACTTTTGCCGCATTAA

AATCTGTTTAAATTGATGCGAAAGATAGATATTTCCTAAGTTATCCATAACATTGAATAATGTTAACGTG

AATCATTAAAGTCATCAATTCTGTTGCTGAATTATTAAAGGGAAGCCAGGTGCAGGCAAGGAAGCCGAGG

ATATAGATATGGGCCTGGAATCTTTTTTTTTTTTTTTATTTTCAAAAAAAATCGATTTCATTTGGTACTA

TCGAGACCTAACGCGAGCGCTCAGCAACAGCGAAAAAGTCCCGTTTTTTATATCCGGAAAGCTGTATGCC

TTGAAAGAGGCTTGTACAGTTTGGGAAGAGATCTCTCCCAATCGTTTTCTAGTCATTATGGGATAGTAAG

AAGGGGGGGTGGATCTACTTCAACCAAGATACCCTTGGGTACCACTATACATAATATAGAAATGAGACCT

GGGAAAGGTGGACAATTGGTTAGAGCAGCTGGTGCAGTAGCAAAAATAGTTGCAAAAGAGGGTCAAGCGG

CTACACTGAGACTACCTTCCGGTGAAATTCGATTAATATCTCAAAATTGTTTAGCAAGTGTGGGACGAGT

TGGAAACGTCGATACTAACAATGAAGGCTTGGGGAAAGCTGGATCTAAACGCTGGTTAGGAAAACGTCCC

AAAGTAAGAGGTGCGGCTACGAACCCTGTGGATCACCCTCACGGAGGGGGAGAAGGCAGGACATCGATTG

GCAGGAAGAAGCCATCAACTCCTTGGGGATGTATTGCGCTTGGGAAAAGAAGTCGGAAAAATAACAAATA

TAGTAATCCACTTATACTTCGTCGACGTAAGAATTATTGATAAATAGGTATATTAAGTAGGAGGGTAATT

AGCCACGGCATGTTCATCAAAGAAAGGTCCTTTTGTAGCCAATCATTTAATACGAGAAATTGAAAATCTT

AATGTACGGAGAGAAAAGAAGTTAGTAATAACCCGGTCTCGTGCCTCTGCAATAGTCCCTAGCATGATTG

GTCATACTATTGCTGTTCACAACGGACGAGAGCACCTACCCATTTATGTAACTGATCGTATGGTGGGTCA

CAAACTAGGAGAATTTGTACCCACTCGGAATTTCCGGGGACACGCCAAAAGTGATAAAGGGTCTCGCCGA

TGATTAGGAAATTATATTTCATGGAAAACGAAAAGAAATCAGAAGTAGGAGCGCAAGCTTTGGCAAAAAA

TATCCGTATGTCAGCTACTAAAGTGCGACGGATTATCGATCGAATCCAGGGTTGTTCATACGAAGAAGCA

CCTGTATCACCTGAATTTATGCCTCATAAAGCGTGTTACCCTGTATCAAAATTAGTTCTTTCCGCAGCTG

CAAATGCTAGTACTAATCTTGGATTAAGTAAATCCAATTTGTTCATTAGTGAGGCCTGAGTGGACAATTC

CACTTATTTAAAAAGATTTCGTCCTCGAGCTCAAGGCCGCGGTTATCCAATAAGGAAACCCACTTGTCAA

ATAACAATTAAGTTAAATTCGAGGTTGACTAAAAAGCAAAATAAAGGCTAGATAAGTTGATCAGTATTGA

GGACGTATTGATAAATAGAGACATATCCAATAAAAACTAATCTAATATTGAATCGAGGAAAATTATATAT

GGGGCGAAAGATTCATCCACTCGGTTTTCGACTCGGTGTAAATTAGAAGCATTATTCTTACCGGTTCGCC

CAGATGGAAGATTATCCAAAATTTTTGGAGGAAGATAGAAAAATACGCACCTCCATTGAAAAGTATGTGG

AAAAACATGTGAAGGATTCTTCAAATTATGGCGGGATTGGGCATATAGAGATTCAGCGAAAAACGGATCC

CATTCGGATTGAGATACATACAGGCTTTCCCGATCTACTCGTTGAGGAGCATAGTTTAGGGATTGATCAA

ATGAAAAGCGATATCGAACATATGTTAGGTCTCGGGAATCGAAAACTTCGAATAACTCTTAATAATGTTA

CTCAACCATACGGGGAACCAAAAATCCTAGCAGAACATGTTGCTTCACAGTTAAAAAATAGGGTTGCTTT

TCGAAGGACCATGAAGAGGGCTATCGAACTAGTTGGAAGAACCAGTAATAAAGGTATTAAGATCCAAATA

GCCGGACGTCTCAATGGTAGTGAAATGGCTCGAGTCGAGTGGGCCAGGGAGGGCAGAGTTCCTCTCCAAA

CTATTAGGGCCCGTATAAGTTATTGCTACCACCCGGCTCAAACGATTCATGGGGTTTTAGGTATAAAAAT

TTGGATATTCCGGGATACTGAATTATCCCTCTCCATAGGAAATGAAACTCTTTGATAAATCCTGGTGAAA

TCCACGACAGCTTCATTCTATTCCAATTCTAACAATCTACACTCATTTTTTCTTTCAAATAAAAAAAAAA

TCTTTGCTATGCTTAGTGTGCGACCCGTTCAATAAAAAGCTCTTTACCCATAATGAAAACTGATTAATTG

GTCGATAAATCTCCGGTGTCAAGTCCTGGAATGAGTGCCAGACACGGAGCATAATTGTATCGGCGCAAAG

TTTCTATCCACGGGAGAATATTTTTTCTAGCGAAGCCGGAAGTGGTATCAATTTATGGATACTATGAATA

AAGAAAAAAAAAAAAAGAGATATAATTTGATCTTCTTTCAAGATCGTATGGTTAACCATTCAACTCCCAA

AAAGCAGTGTGATATAGCATAATTATCGAAACTATCCTAATTATCGTATTAAAATAGAGCTTCGAGTCAG

CTGGCACTAACAAAAATGACTCAATAAAACTGAGACTGAGGGAGGGAGGCTCCGTTGCGAGGGGGGGACC

CAAACGTTTGCTTTAAGAGACTAGACGAACGATGAGACCTCCGGATTGTATTCAGTCGATAAACGCCAAC

GATTCGGTGGATGGGGTGGCGAAAGAAGCCCAAGCTTCGTTGAATCGAAGTGGAAAGTAGCTTAAAAAAA

AAAAAGAGAGAGATCGAGCTCATTTTCGCCCGTGGGTTCAATACCAAATAATATATGAACTTTTAGAACT

GAATGAGATAGAAAGATTCAATGAAGATAAAAACCAATAATTTAATTAGAAGTTCTTTCAGCTAGCAGTT

GATAGGTCTACGATGCAGAGAGAAGCGGTATTGAACTTATGAGGAGCCGGTTGAGGGGAAACCTCCACGT

CCGGTTTTGTATCAGAGATGGAAAGATTCTATTGCCATCGACTGTAACCCCAAACGAACTAAATTCCGTA

AGCAACATAGAGGACGATTAAAAGGAATATCTAATCGTGGTAATACTGTTTCTTTTGGAAAATTTGCTCT

CCAGGCTCTCGAACCTGCATGGGTTACAGCTAGACAAATAGAAGCGGGAAGGAGAGCAATAACGCGCTGT

GCTCGTCGGGGTGGAAAGTTATGGATACGCATCTTCCCCGATAAACCAATCACTATGAGACCCGCTGAAA

CGCGTATGGGATCAGGTAAAGGATCTCCAGAATATTGGGTATCCGTAGTTAGACCAGGCCGAATAATTTA

CGAAGTAAGTGGAGTATCGGAAGATGTAGCTAGAGCTGCTATGGGGATGGCTGCTCACAAGATGCCTATA

CGTACCCGAATAGTGACCGCCCTAAAATCGTGATACTTGAAGAAGGAAAATTGAGTTTTCTATTCAACGT

AGGGCGTGATACTACATAATTGAAACTTTTTCTATTTACGTCTCGTCTTAGAGATACAGAAGTGCAAACA

CTCATAATGTCATTATTATTAATATTAATATCAATATCTCCTACGATGATAATAAGCATCTAAAAGAGTA

ATAATTAAATAACTTAGAAATAGTAATAATCGTAATGATAATAATATCCACAATTATCATTACGATTGTT

ACTAGAGTAACCATAACCATTGGTATTACTATTACTGCTCCGGCAACACCAATAATCTATCTATTCACCG

ACGCGCACATGAGTAGCGTGATGAAATATATATTCTTAATTCGGATATAGATACAAAACTAAACCTATAA

TCTTTCCTGATTAATAAATGATTCAAACTCAAAGTTATTCAGATGTAGCAGACAATAGCGGAGCCCGGAA

ACCAATGTGTATTCGAGTGCTAGGGACCGGTAACCGTAAATACGCGAATACGGGTGACACTATTATAGCC

GTGATCAAGGAAGCGGTACCCAATATGTCTCTGAAAAGATCAGAAGTGGTTAGAGTAGTGGCCGCGTGTA

CCCGTAAAGAGATGAAACGAGATACTGGAATGATTCTTAGATTTGATGACAACGCAGCAGTTGTTGTCAA

TCAAGAAGGGAATCCTAGGGGAACCAGGATCTTCGGTCCAGTAGCTAGGGAGTCGAGAGAATATAATTTT

GCTAGAATAGTCTCATTAGCCCCCGAGGTGTCGCAGTAACTGGGGAATAGAATGAATGAGAATTGTCGAT

TGCTGCTTCGAATATCTAAACTTAATCTTTCATCAAACATATAGAATCTGTTTCAATGATCCGATACATT

TGGGTGTCACGAAGAGACAGAATCTAGTAAGAGATAGATAAAAAAAAAAAATATCTATCTATATATATAT

ATTTTTTTTTTTTTTAGGAAACAAATAGATATGACAGAACTTTTTTTAGGGCCCAACCCCACTATGTTTG

ACAAAAATAACATATATATATATATATATTACTCCTTATTAGTGTAGTAAAAAAAAAAAAACGGAAAAAA

TTAGGAATCATTCTAATATTAATAACTACTGATTGATATTTCACGAATAACGATACCATTTCTACCATGA

TTACTACCACACGAAACGCTAATACGCGAAGGAAGGTTACGATTCGGATACCTGCTACTAAAATGACTCG

GTGTATTGGACGAATCTTATTGGAGGAGGGTTTTGTGAAGAATGTTGCAGAACATAAGCAAAATATGAAA

GAGTTTCTGGATGTGAGTCTGAAACATTAAGGTAAGAAAAGGGATCCATATATTACAACTATTAAACGTA

TTAGCAAGCCTGGCTTGAGAATCTATTCTGATCATCAAGGAATCCCAAAAATATTGGGCGGTATGGGAAT

TGTAATTCCACCAACATCCTACGGACTTGTGACAGATCGAGAGGCTCGACGAAAAAAAATTGGGGGGGAA

ATCCTATGCCACGTTTGGTGATTCATAAACTTATTTTTAAACGGACAATTACTTACTATGGAAATTATTG

GGTCTTATAATGGATATTAGCGGTAGTAAACGAGTCAGTAATTTCTAAATGAGATCCGTTAATAATAGGG

GAGGTTTATCTCTGTCGAATGATTAAGAAACAGAATCTTATTGACATGGAGGGTACAGTTACAGAATCAC

TTCCCAATGCCATGTTTTGAGTGTGTTCAGATAATGGATGCCAAGTCTCGACTCATATATCGGGAAAGAT

CTGACGTAATTACATAAGAATATTACCGGGAGATAGGGTAAGGGTCGAATCAAGTCCTTATGATCTTACC

AAAGGATGTACCATTTATCGTCTCAGAAATAGGCCAACAAATGGCAGTCAATAGATTTTTTTGCTATTGC

TACTACTTTAAAAGAACTTGTTTGTTCATAATTGTTTTTACAATATGACTAATAACAAAAGCCAAAAAGG

GAGGAGAACGCCTGTCGAATCTCTGAATAGATTTACCCAATTAAATTAAGGTTATAGCTACGAAAATTCG

TGCCTCCATTCGCAAAATATGTGAGAAATGTCGACCGATTCGTAGACGTAGACGAATCATGGTAATCTGC

TGCAATCCGAAGCATAAGCAGAGGCAGGGGTAATAGGGAGACTTGCGGGGTGGAGACAAATATAAATTAA

CAATAGCCTGTCCATTATGAACAATAAATCAACTATGTCAAAAACTTTGAAAAAGATTCGTTTCCGTAAA

GGGAAGCGCGGAGTACAAAAAGGAGTTATTCACATTCAAGCAAGTTTTAATAATACCATTATTACTGTTA

CGGATGTTCGAGGATAAGTTGTTCTTCGGTGTTCTGCCGGTGCTTGCGGATTCAAGGGTACGCGCAAAAG

TACACCATTTGCTGCTCAAGCTGCAGCAGAAAATGCTATCCGTGCTTCGGTGGATCGAGGTCTGAAACAG

GCAGAAGTAATGATGAGCGGACCCGGTCCAGGGAGAGATACTGCTTTACGGGCTATTCGCAGAAGCGGTA

TAATCCTTAGTTTCGTACGTGATGTGACTCCCATGCCATATAATGGGTGTAGACCCCCCAAAAAGAGACG

TGTCTAACTATTAGTTATTATTAGTTATATTAAAGACGAGGGATTTCTTTATGCTTAAGGATGAAACTTC

GATCTCTACCCAGGTAATTCAATGGAAATGTGTCGAATCCAAGACAGAAAGTAAGCGTCTTCATCACGGT

CGCTCCGTTATATCCCCCTTTAAGAGAGGCCAAGTCAATACTGTAGGGATTGCTATGCGTAGAGCTTTGC

TAGAAGAAGTCGGAGGCGCAAGCATAACATGTGCAAAATTTGAGGGAGTGATACATGAGTATTCTACAAT

AACGGGTATTTAAGAGACAATACATGATATTTCAGTGAACCTAAAAGAAACTGTACCTAGAAGCGACTCT

AATGATTCTAAAGAAGCATTTTTATCTGTAACTGGTCCCAAAAGAGTAACTGCTGGTGACACATCGCTAC

CACCATCCGTCAAAATTATTGATGATTCGCAATATATAGTTACTATTACCCAACCAATATCTGTAAATAT

CGAATCAAGGATTGAAAAGGATTGTGGGTATCGTATAGAAGAATTTAATGGATACAGAGATGGAGAATTT

CCCGTTGATGCCGTACCTATGCCTGTCCGAAACGTGAATTATAGCGTCCATCCCTTTGGAAGTGGTAGAG

AGATGCGAGAGATATCATTCATTGAAATATGGACTAATGGTAGTCCGACTCCAAACGAAGCACTTTGCGA

AGCTTCTAAAAACCTCATAGACTTATTGATTCCTTTCCTGCACATGAAGCACGAAGATGTTCCTCATTTC

GAGGATGAGCAAGATTCTTCCGACTTAACAATATTATCTTCGCAATTAATTGGTGTGGGTGAATCAGAGG

GAGAAGTTCTTAGAAATACATTCATTGACCAACTAGAATCACCCGCTAGAGCTTTTAATTGTCTCAAACG

TGCCGAGATACACACAATCACTGATTTACTTAATCATAGCCGAGAGGATTTACTAAAAATAAAAAGCTTT

GGAAAAAAATCTGTAGATCAGGTTTCGAGAGCTTTATGGGAACGTTTCGCCACAGAGTTACCAAGTAACA

ATGCACGTGTGGATTAAGAGAATTAAGCAGTAGATTCAAAATCATCTTATTTAGAAGCCAATCCATCTCT

TATCGGCTGCACCTTTCTATTCTCAATATTATTGATAAAACAGGAGTGACTGAGCAATTAATTTTTGTGA

CATAGACAAAAAAAAATTGGAAATTAGATTATTGACTATTAGCCATCTTGTTGTAAACGAGAATAATTAA

TCCTCTAATATGATTTTGAACTTTTTGATCCAAACATAAATAAGTCTAGGGAGATATTGTATCGTAACAA

TTACTCCCTAGCCTAAGTATGTGTTTCAAGTTCGTAGAAAAATAACCAAATTGATTTTGAAATAGTCCCA

AAGTTAAAGATCCATCAATGGGTAAAGTTGCTCCAATGCCTAACCAAATAGCGACCGCGGTACCAATTGC

AAAAACTGTTGTGGCTACTGGACGTCGGAATGGATTCTGAAATTTATTGACATTTTCGAGGAAAGGTATG

GTCAACGAACCTGCAGGTACTGACGCCATCAGAAGGACACCTAATAATTTATTGGGGACTGTACGGAGTA

TTTGAAATACGGGAAAGAAATACCACTCAGGTAATATCTCCAAAGGAGTTGCGAAAGGATTTGCTGGTTC

ACCAATCATGGATGGTTCTGGAACTGCCAAACCTACGGTACATGCAATGGTCCCTAAGATTACCACAGGA

AATATATATAAAAGATCATTGGGCCAAGCAGGTTCTCCATAATAATTATGTCCCATACCCTTAGCTAATT

TCGCTCTCAAAACAGGATCATTCAGGTCAGGTTTCTTTGTTATTGGGATGGACCTCGTACTCCCCCATAA

GAATCGAACATGAGAATTTATTCTCATACGGCTCGAGCAAATCCTTAGGCATCTTACTCCACAAGAATCG

GTAGACAAAAGAAATAGTTATTACTTTCTAGTAGTTAATTATTGCTTTCTAAGAATTTTTGACGCCTCTT

CCTCAAGAAAGAGGAGGGAAAAAAAAAAGGAACACGGCGAAGAGTTAGCCTGCGAAGTGGCTTATCACCC

GAGTCAGCCTAATCGTTTGATACGAAGCTTCTTGGATTATCTTGTATCCCATACATCGTGTATCGTGCCA

TTGCCAATAGATGCGAGATGATCGCGAACTACTACCAGTATAGGATCTTAACTTGTTATGACTTCGGCTA

TATCTCTCTTTAGATCGTTTTTTTACCCCGACGGTTATTTCTACGGATAATGGAATATATTGGACGCAAG

AGAAATGGATGCGGCCTAAAAACCATGTGTTCTAAAACTTCACACTACCCCGATTGGGTATGTATAGGGT

TTAACGGAGCCTTGCAAAACAGTTAGTTTGATCATGGGGAGAATTCTCCAAAGAACTTTCTTGGCTTGGG

AAGAAGGATCCTACCTACATCCAAGTTTCGATTCCTGATACTAAGATTAGGAAAAGTTGGGAAAGAGACA

CATCTTCTGGTGCAGCAGCATTCGATTCAATATCTGCGTAGCCTACGCGTTTTGAGACAAGTCACACACT

CCCATAATCCAATATTTTACCTTTTAACGCTTCAATCTTTTTATCCCGATAGTCCGAGACAAGAACTCAA

TCCGCTAGATAACTTTTCATCTGTTTCAATGGGAGACACCAGCGGCAATAGAATAGTAACCTTTTAAGAA

ATTAGGGATTAAGTTCCTGCAGTGATGCAGAGATCATTATCTTTCACTCTTGAATCAGAAATCATGGAGG

ACCCGGAATGCCTTGTTTACGGATCATTGGGAAGTGCATTAGCATAGAAACAGCAGTAAGAAGCGGCGAT

ACGAAAGTATGTAAACTGTAAAAACGAGTTAATGTAGATTGACCTACACTAACACTTCCTCGTAATAGCT

CTACTAATGAAGATCCTATTAAAGGAATAGCTTCGGGTACACCGGTTACTATCTTAACTGCCCGATAACC

AATTTGATCCCAGGGTAAGGAATATCCAGTTACACCAAAAGACACAGTTAGTACGGCTAGAATTACACCA

GTAACCCAAGTTAATTCGCGAGGTTTCTTAAATCCTCCCGTGAGATAGACACAAAATACATGCAGAATCA

TCATTAGGACCATCATACTTGCTGACCATCGATGAACGGATCGGATTAGCCATCCAAAATTCACTTCAGT

CATTATATATTGAACAGAAGAAAAAGCTTCTGTAACAGTCGGACGGTGATGAAAGGTCATAGCAAAACCG

GTGGCTACCTGGACCGAAAAGCGGGTCAACGTGATTCCCCCCAAACAATAGGATATGTTCACGTGAGGAG

GAACATATTTACTAGTAATATCATCAGCAATTGCCTGAATTTCGAGACGCTCTTCAAACCAATCGTATAC

TTTAGCGGGATGGGTAAGCTTTTCCAACTCCCCCTTCGTAAACTGTACATGAGGATTTGCTCTCATACAG

CTTAAACAAAAATGTTTGAGTAACCGTCCATTCTGTTAGTAGTCACTTGGCGTGAGGAAAAAAATAGAAT

AATATCCTCGCCATCTTTCAGTTTATAAAATAAAGGAAACAGCGACTTAGCCGTTGGAAACCTCGGGAAT

ACATTTTGCCTCAATCTCATGTTAGCTTTTAATCATCATTCACAATAACAACAAATATTATTAGCATCTT

GAGAAATCTTTTCATCTTATCGATGGATTTATCCATAAAAAACTGGGATAAATAAATGAATAGAGATTGT

CTCGTTCCAATCTGATTATTTGAGCATCTATGAACCTTGGATTTCTACTATACCCCGATACATTCTCTTA

TTAGTAGATAAGAAGATCTAATGGGCAGCAACTCTTCTACCACCCTGCATATTTGTAGAACAATACATGT

TTTGCATGATTATGGTCGTCCTTTCTTATAGAATCTAGTAGATAATCGATTAAGAAGTACTTCATTTTTC

TGATAGTTTCCTGATCAAAAATCGAGTTCTTGTACTTAGTATCGAGTAACAATCTTGTCACGAAATTTGA

GTAGTAGATTAGTGCAAATTAATCATAGTCCCAACCTTATCAATCAATATCCAGTTTCTCGCGCTTTTGG

TGCTAACCATTCGACTGCTACCTAGCAAGATAATAGTGTCTTGTTCAAATGAAAAAAAAAAAAAAAAGAT

TGTCTATTTGTTGAACCAGATTGGTTGCGACGAGTCACACACCCGTATTATCAAAATCTTTGAGGTAAAA

ATTTGCGCAATTTAACTACCTTTTGGGGTTTATGAAAAGTCTTTCTTTGCGAACCCCTAGCTGTTGTAGT

AGTGGGGTTCGCCATACCAATCCGACCTTTTTTCTACCAACTTATCGGAATACCGTCCAATAGAACGGAT

GAGTTGTAAATTTCCAGAATAGTAACTAAGAATACTGCGAATAAAGCCATAAAAAATCCCATTAGGGGAG

TAGTTCCCCAACCAGGAGCAACTTTTCCATATTCTGAGTTAAGAGGTTTCAGAATTATTCCTAAAAGGCT

GATTCTGGGTTTACCCTTAGGAGTGTCATCAATAACTTTTGTAGCCATAGAGCTTATTCAATTGATTGAA

CTTTGCTGACTTTGTATACTATTATATCGGATAAGAACTAATATTTCTTGGGTCACATAGCAACGGAAAC

TGCAACTTCGGTCGCTATCTCTATATCCTGTTCACCCGTTAGCTTTACCGGTCACGCTTCGTATACCGCT

TTCGGTCAACCCTCTAAGGAACTCAGAGACCCTTTCGAGGAACATGAAGATTAGTTAGACTGAGAGACCT

TCCCGCAGAAGGTCTCTGATTAGTTCTATTTTCCTTCCCATAATCTCGCTCATGCGACGAAAATAGTTAA

GGAAAGATCGTTACTTTCCCTTGTTAGGAACTTTGGGTGGTTCTCGAAAAAAAATGGCAAAGAATATTAT

ACCTGAAGTGGCTACCAATAAAAATGTATAAACCAGTGCTTCCATAGATTCGACCGTAGAGTAGTATTTT

GAATATATCTTTCATACTAATTAGAATAATCTTATTCCTCCTTCAATCTTTTTTTTGTTCTAACTTGAAC

CCAGACTACTCAATTAGAATTAGATTGACCGGTTAGATTTAACCAAACCAAGTATTTCTTTGATGGGGAG

GGATTTTGTTTTCGTGGGGTGTAATCCCATTAGTAAATAAAAATGAAATCCTCTTGGAATCCTGCCCCTA

TAAGTTGGGAAAAGACCTTTCAAATCAAATAGGCTGTCTCTTAGTACTGGGATCCCCCAACTTTTGGAAT

GTTCCGAATTCAACCTGAGCGTCTAGATCAGGATCAATACCAGCAAACACGTCTCTGAATAAAGTTCTTG

CGCCGTGCCAGATGTGACCAAAGAAAAAAATGAGAGCAAATGTGGCGTGACCGAAAGTAAACCACCCTCG

AGGGCTACTTCTAAAAACACCGTCTGATTTCAGAGTGGCACGATCAAACTCAAAGATCTCACCTGATTGG

GCGCGTCTAGCATATTTTTTAACCGTAGCGGGATCGCTAAAGCTAGCACCATCTAGTTCACCGCCGTAAA

ACTCTACGGTTACACCTACCTGCTCAACACTGTATTTTGATTCCGCTCGTCTGAATGGAACATCGGCTCT

TACGATACCTTCGCCATCCACTAAGACTACCGGGAATGTTTCGAAAAAAGTAGGCATGCGACGTACAAAC

AGCTCATGGCCTTCTTTATCCTTAAAGATAGCGTGACCTAACCAACCAACAGCTATCCCATCACCATTGT

CCATTGCACCTGCTCTGAACAACCCACCTTTGGCGGGGTTGTTACCAATATAGTCATAGAAAGCTGATTT

TTCTGGGATCTTAGACCAAGCTTCGGATAGACTTAGATTTTCAGCTTTACTAGAACGGATTCGTTGATCT

ATCTCTTGTTGAAAATATCCCTGATCCCATTGATAACGGGTGGGGCCAAATAATTCAATTGGAGTGGCGG

CGGAACCGTACCACATGGTTCCAGAAACTACGAAAGCGGCGAAAAAAACAGCAGCGATACTACTAGATGA

CACGGTTTCAACATTCCCCATGCGTAGAGCTTTGTACAATCGTTGGGGAGGACGAACACTGAGGTGAAAT

AGACCAGCTAGTATACCTAGAACTCCAGCTGCTATATGGTGCGAAGCTATCCCTCCTGGAACAAATGGGT

CGAAACCTTCAGCCCCCCAAGCCGGATCTACGGGTTCTACTTTTCCAGTCAATCCATAGGGATCTGATAC

CCAAATACCGGGCCCGAATAAACCAGTTACGTGAAATGCTCCGAAGGCAAAACAAAGTACTCCTGAAAGG

AATAGGTGAATTCCAAATATTTTTGGTAAATCTAAGGATGGTTTTCCCGTGCGATCATCGCGAAACAGAT

CCAGGTCCCGATAGACCCAGTGCCAGATAGCAGCTAGAAACAGTAAACCGGATAGTATGATATGAGCGGC

GGCTACACCTTCGTAACTCCAGATACCCGCATCAGTTACGGTATCTCCAGTAATGCTCCAACCTCCCCAT

GACTTTGTTACTCCAATACGAGTCATAAATGGGATGACAAACATACCCTGTCTCCACATCGGATCAAGAA

CGGGATCGGATGGGTCAAAAACGGCTAATTCATAGAGAGCCATTGAACCCGCCCAGCCAGAAACCAGAGC

AGTATGCATCAGATGTACGGAAATCAGACGACCAGGATCATTTAGTACAACAGTGTGAACGCGATACCAA

GGCAAACCCATGAAAAACCCCTTTCTTGGATATTGGAGATGAGTGAACACTACGTAACTTTCTCGCGATG

TAGGCTTGCGATACAAATAAAGAAAAAAAGAACAATAAATTGTTGCATAAAATATCTAAATCAATATTCT

GGTTTGTTATTAGAGCGCTACCAGTAAAAAGAAACAAATAATCTTTTTTTTTTTACTGATAAACATCTGT

ATCTACTTTTCCATCTATTTGTACAAATAGGTTGGGTTGTATAGGAAAAGCCAAGAACCTTTCTCCCAGG

AACAAGAAAGACATGGATATTTTAGCATCTACATTATTTATATAACAATGTAGAGATTGGTCCCATTAAA

GGCTGTCAATATCTATCAAATTCACGATTTTTTTGTCCCCTACACCGTCTTCATTAAGCGTGTTATAATG

TGGCATAAGCTTTTTATCGCTTTAGCTTCTACGTTCCTACTTTAGAGATAACTATAAAACATTTTCACTA

ATTTCTGCATGCCAATCGGTGTTCCAAAGGTGCCCTTTCGTCTACCTGGGGAAGAGGATGCGGTTTGGGT

TGACGTGTAGTGCGACTCGTTATATATGTTGAGCCATGTGGAACCCTTTCCCATCATTTATTATCCGATC

GATATGTCTCTATCTCGCTTAGATTCGACTAATTCATCAGTGGTCAAATGCGTGAGATAAGGTTTAGCAA

GAGATTTATTAATCATTAGAATCCATGGCTAGTTGAAATGAACAGATTATTTAGGCTCCGGTCACTGAAT

CCCAAGGATCAATCGTAGCAAAGGTTGCTACGAAATAGAAAATAGAATGAACGGGGCTTTAAATCTAAAT

AGGTCCGTTAGTTTTGAATACATGAATCATGGGAATAGAGAGAGGGGAAGTAAAACTATTCGTTCCGTAT

GTACGAATGATGATCGGACTCCATCTCCCCCCGAAGTAGAAACTGAACCTAAAGATTCTTTTCATTGAAG

GGACTCAATTACAAACAGGAAGATACTGGTGTGAAGGGGGTTGGGGCGCTGGGGTAGGTTTACCCCTCGA

TACGCCGGTTACGATGCGGTTAAGAATGTTCAATAGACGGGACAGACAAACCTAAACCAAAAAGAAAATA

GTGAGGGACGTCTCAGACGGGGGGGGTAGATAAAGGGTGGAGAACAAGAAAGAAATATATATATATATAT

ATATATATTTCTTTTTGAAAGATGTAATAGATTTCTTTACGAAAGAGACATAAAGTTTCTTATCTCTTTC

TTCCGCTTCTACGTAGAAACAACCAGAGCCGTATGCTTCTAACGACGCTTATACGGTTTCAGAGGGGGGG

GGGGTAAAGACACACAAACCTATCCTGATCAACCGGCTTTATCGGGAGAGACTTCCTCTTCTAGGTCAAC

AAGTGGATGATGAAATTGCCAATCAACTTATCGGTATCATGATGTACCTGAATGGGGAAGATGAAGCCAA

AGATACGTATTTGTATGTGAATTCTCCCGGTGGAGCAGTATTAGCCGGAATATCTGTTTATGATGCTATG

CAATTCGTCGTACCAGACGTGCATACTATTTGCATGGGACTAGCCGCTTCAATGGGATCTTCTATTTCGA

CTGGAGGAGAGATTACCAGACGTATAGCACTACCTCACGCTCGGCGCCAATGATTTGTATGGGTTAAAAC

TATGCCTTCGCCTAGTTGAGGTAACAGTAGCACGGCATTCAATACTTGGTGAGTCTTTGTTGGATGCATA

TCCAAGAATGAAATAGTGAAGTGCCGGGATAGCAAAATGAGTCAAAATTTATATTTTTGGTAAATTTATC

GGCGATCAATATATCTTAGCGTCATAAAATGTATAAACTATTGAATCTTCGCGATTTCTTAAGATCCAAA

TTTTTATCAATTAAATCTTTAGAAGATTAGGAAACATTGACTCTATTCTCCATCGGGAGTATACATAGCA

AACCTTGGGATTGCTGTGACAATAAAGCAACGGAACCATCATAATATGTTTAAAAGGATGGTACATCTCC

TATAGTGTTGTAGGAGGGAGTGGGGGGGGGGGGGGGGGTAAGAAGAGGCTTCTTCATTGCAAAGGATTGA

TGCTTCAATACTAATTTACGTCTGTTAACAACTTCCACCCCACCAGCTAGATACGTAGCCGTATGCAGAA

ACAGTTGCCTGTACGGTTAGCCATAGGTAAAAAAGTGATGTCCTCAATCAGGGTAATGATTCACCAACCT

GCTAGTTCATATTATGATGGACAAGCTGGGGAGTGTGTCATGGAAGCAGAAGAAGTATTAAAGCTCCGCG

ATTGCATAACTAGGGTTTATGCACAAAGAACTGGCAAACCTTTATGGATGATCTCCGAAGACATGGAAAG

AGACGTTTTTCTGTCAGCAGAAGAAGCCCAAGATTATGGTGTTGCGGATCCCGTAGCGTTAGAAAACGCT

CCAGGTTGAATATTTAGTAACTAAATAAGAAACGTTCCGGGTCTCTAAAGAGAGGGTAGATTCTTTTCAC

ATGACAAGTAAAGACGAGAGGGTGTCTCGCCTTTTTATTCGACCAACAGCTCTTATCTATCTATCCATAT

GGATAGATAGATACGTTTATTTATAATCGAAATAGAGTCTGAATCTAATCAAAATATTGGAGTAGATGAT

ACTAAAATATTTTATCTTTTGTAGTTTCATATTTGTTTGCCTGAGCAACTACCGACTTCGAGGCTTTGCT

TTAAAGTGCCCCTTTCCTCGTTTAGGCGAAAGAATTTAATAAAATTTGATTATTCAATACGAGAGGATTC

GGTTCTTCCCCATGGTTAATAATATTTTGAACCAAATAGATTATCTGCATCTTTGAACGTGCCAACAAAT

CAGCAACTTATTAGAAAAGCAAGACAACGATTGGGGAGTGGAACAAAATCCCCTGCCCTCCGGGGATGCC

CCCAACGGCGAGGAGTATGTACCAGGGTGTATGTGTGACTCGTTCGGATCAGAAACCGAGTGACATTAAG

GGATTGATGTCGCAGAAGAATCCTCTTATTGAGATGAGAAAAAAAAAAATCTATAATCCATCTGTTTCAA

TAAGGAATGGAAATTCATGGTTACGATCGGTGCAAACCCGATCATCTTGATTTGGGATGATAAAAAATAA

TCGATGATACTAAAATTGAATCATTAAGCGAAGTCATAATGATGGTATCGATTTTCATACCCTCTCTAAT

ACTATTGCAGTGACAGTGAGGGTCAGCTGTTCCGCCAACTTCCGATGTGAAATACCGTTACTATACAGAT

AAGTCTTTCTGCGATAAAAAAAAAAAGAAAGAAATTTGCTCGGGCTACCGGGTGGAGCTAGATATTGGGG

ATCATACGACCTACCAACAGCAATTCTATTTTCTCATTCTAGAAAAATTGAAAGCTCCGGTGTATAGGAG

GGACCCAGCTGCCAAAGACTGAACCATGGAAACATTGGAATCCGTAACGTGTCCAGTGCAGCATCCATCC

GATCAGTAAAAAAAAAAAAGTATCTAATCTGGAGTGTTTGCGGATGGGAAAGTCGGAGTAGCAAAAGCCA

TTGGAATCTTTTCTTTTCACATTAGAAGGAGAGATCTAAAAGTTTGTAGAAGATAGAATCTTCATTCTTG

TAACAAAATGACAAAATAATGGAGGGATCGTGGCGTGGGTTTTCTATTCAAACAAATTCATTTCTATCAT

TAGCTTAAGTATAATACGCTAATCAAGTAAATAAAAAAGGGATTATGAGAACTTATATCTTTCCTGAAAC

ACTTGAAATGTTTATGATATTTAAATATTGAGAAGTTCACCGCGCGTAGTGTTACTATCACTATGTAGTA

ATAGACTTAGATTCTGATGATTCTATAAACCATATATCAATAAACCATATTCCAATAAACCAATCTATCT

CTTTGAATTGGTATCTCTAACTAAGATAAAATAAGGGAAAACTATGGAATCAGCAAGAACATAAAAATAA

ATGGATTTTTCAAAAATTAAAATCTGATCTTCTGTGAGGCTAGACATCTAATGACCAGGGTAAAACGCGG

ATCCGTGGCTCGGAAGCATCGCAAAAATATTCTTCAAATTGCATCCGGATTTGAGGGGGCTCATTCAAAA

TTATTTGGAGCGGCAAACCAGCAAGAGAAGAAAGCATTGGCTTCTGCTTATGCAGATAGGAATAATCGAA

AGAGAGAAATTCGTCGTTTGTGGATCACTCGTATTAATGCAGCAGCACGGGAGAATGGAATTACGTACAG

TGCGACGATTCACAATTTGTCTGAGAAATAAGTTTATTTGAATTGCAAAACACTCGCGCAGATAGCTACC

CCAGATGCTTATTGTTTCTCTAGGATCGTACGGGTGATTAATAATAAGATACATTAATTTAATATTAGAA

ACCTCTCCGGATGATTCTTCTCGGAGAGGCGGAAGAGATAATATTGAATGGATCCTCTATCCTGGCAAAA

AAAAAAAAAAAAATAAAGGGAAGGAAAAAGAGTTTTCAGAGATATAAGACTCAACTTAATTCTCTTTAAT

CACACTCGTTTCACAGTTAATAATAAGCATATTTTCAAATACCAAATTAGTTAATTTATTAGAGTTCGAC

TTTCTAGTCACAATTAATAAAAGGTCTAATTCTCATTGTTCGAGAAGGGTAGCAAAGCCGGAATACGAGC

TCTTTTTATGGCGACAGCTACTGAACGCTGTTGCTTCGAGGTTAATCTATTCATTCGTCTGGATAAAATT

CTTCCTTGCTCACTTACGAATCGACGAAGTAAGGTTGTATTTCGATAATCAATAATTTCATCAGATCGAA

TAGATGGGGAACGTCTACGGGAAGATCGTTTAGATTTATTCATGATACTCTTCGTGTAACTACCGATATT

TAATAATATTGACTATTTCCGAATCCATTATAAATAGCATTCATTTTTTCAATTCTTTGTGAATAGTATG

TTTGTGGCAGCAAAAACAATATTTTTTTGATTCCAATCGAGTAGGTGTATTACGACGATTCTTACGCGTA

GTGTATCGAGAAATACCCGTAGATTCGTCACCAGGCTCTTTTCGAGTACAACTTGTACATTCTGAAGCAA

TAGTTACTCTCGCATCTTTACTTTTAGGCATAATATTGATTGGACTATATAAAAAGAAGTGAGGGGGGGG

GGTAGGTCTAAAAAAGTTTGGGTGAACTATTTGAAAAGCCCCAACCCATAAGATTTGAATTTTAATTATT

CCCAGCAATAGCTCCATTACTCACTACTTCCTTCACAAGGAACAAGAATTGATATTTTATCAACCTGTTT

GATTCTCTTTCTAACTACTCTCTTAATTAGAGAAATGGAAATAGTAAGGCGTCTGGAAAAAAACGATTTG

TTTCTATTGATGAACCAGCTAACAAGCCGAACCATATTGTAGCTATCACAGGGGCCGTGGAAAAATAAGT

TTTTACATATTGCATTATAAATTCTCCTTGTTCTTGATTTTTTCCTCCCCTCTCTCTTCCCTTTCTATCC

TTTTTCCTTTTACCATTGAATATTTGCTACGCTCCCATTGATTACTCTTACTGAAAAACTAGGAGGATTC

AAAGTGATACGAGACAATGCCCCCTCGAGGCATAGATTTTTTTTGCTAGTAGCCAATACTGATAATTATT

GGTTATAATCAATTAAATCAAATAGTTTTAGGTCGATGATGTCAATTATGAATCAAGATTAATAGGGATG

TAGCGCAGCTCGGTAGCGTGTTTGTTTTGGGTACAAAATGCCGCAGGTTCAAATCCTGTCATCCCTATTT

CTGATCCATGTACCAAGCATCAAGAATTGGATCTCTCGTTTTATTCAATTAATCTCTGTTCCTTACGGGA

AAAAAAAAACTTCTTTGTCTTCTCCCGTTATCTCTCCTTATTCACTTTCTTTTCCACCGCGTGGCAAAAG

GTCTATCACGCTCGGAAGTCTATTTCTGCCAGCGCACACTTTCCAAACGAAAATAGAAATGGCTCCAACG

GGAAAGAGGCGCTCTTAGTTCAGTCCGGTAGAACGCGGGTCTCCAAAACCCGATGCCGTAGGTTCGAATC

CTACAGGGCGTGTCTATTGTCACTCAACCAGAACCTAATTAATTGTCTTAATACGCATTGAAAATACAGA

AGCGATAGAAAATAATATTGTTGCTATCGACAACTACCTCCCCACCCTTCTCATCTGAGAAGGGTCTGCG

GACTAATCATAGAAAAGGTATATTAGATAGAGTAGATTATATAGAGCGAAAAAAAAAAGAATGGGGAAGG

AGAGAAAAAAGATGATGAAATTGTAGAGGAAGATTAAAAGGGAAATCGCTCTATCTAGACAGATATCGCT

CTTTGTGTTCCCTAGTTCATCATCTTATTTAAGATCTGAAAATTATTAATATCTATCGAATTTCTAATTG

GTCACCGCGTCGATATTGTGAATATGCAGTTACAAATGATCCAGCTAAGGTTATTGGGATCAAACCTAAC

ACAATTCCAGATAGTAATGCTTCAACCATTCTAGTTTGTACATATCTAATATGAATACTTACCATATTGG

GTTTAGGTTTTAACCAATAATCACTAATTGGTAAGTACAATGAATTTGTAAGCGCCAATGGGGCCCTCCT

TCTTTATTTTACTTTTTCTCTTTCTAAATGATACTGCTATATCACAGAATCTGGATTTTGTTCAATCCAA

TGAATAAGGTTAAGGTTAAAGTTGGTACAGATGTTGAAAAAGCAAAGTAGCTTAATAGGGTGAGCATGGA

TTTTAATACCAAATTATCTAACAGATGGATTAGTATACAATTTTATGAAGTAATTTATTACTTGAAATTG

CTGACTAAAAATCGTTTACTCGGATTTGTTAGACCAATATTAAGTAAAGTATGTGAGCGTATGGGAGTGG

TTCATCCGGTAAGGTCACGTCTCACTAATTTCTAGAATTGACAAACAGATATTTTTATACCGTTGATTAA

TCGAGTGAGTCTAATTGAATTAACCCCCCTAATAGCTAATAGTAATAGGGGTCGATAACATAACAATCTC

AATACTAGGGGCTTACGCAAATCAAAAAAAAAAAGGGGTAAATAGGGGTGAATTTATTGAATGGTAACAA

TTATTAATTGGACGTTTCGGGACGAAACTCTTGACTGTTCGGTGAGACCAACGAGGGACAAAGATTGTGT

TATATCTGTGTCTTGTATTTCAGTGATAGATCTTATTCGGAGAATCAAGAGAAGTTATAAGGTTCTAATT

AGTGACAAAATGAGTGTGTAGTCAATAAATGGTATGAAACAATGCCCGAATATTTTGCAATAGTTTTAAT

AAACCAATCTTGGATAACTATCAAACGAACGGACCCTACCAATTTAACTTGTCAATTACTTACCAGCTTC

AAATTTGGTTTGTTTCTTTTCTTTCACCTTTTATTTATTGGTATTAATTATTTAATCTTTTTCATAACAT

AATATAGAAATGACGATTAAAAATAAAAAGGTATTGAAGAGAAAGAAGAAGATGATTCTCGGTAGTCTAT

CAGATTCTACTTGCCAAGAACAAGTAACCTTGCCGCATCGAAGGGAGGCTAGCTATACTGATCCAGTATA

TTTCGGATATACCCTTGGTATAATAGTGACAACCTAAATTGGATTGATTGCGGTTCGCTGAAGTATGCCG

GTAGATTCTGCATCTTCTAGCATTACTACCCCTTCTCGAGAAACAATCCTTTTTAGTATTACAAGAGAGA

TACGGAGCTAAACATGTCTGGGAATACGGGAGAACGTCCTTTCGCCGACATTATTACTAGTATTTGATAT

TGGGTCATCCACAGCATTACTATACCCTCCCCGTTTATTGCAGGTTGGCTGTTTGTCAGTACAGGTTTAG

CTTACGATGTTTCCGGAAGCCCCCGTCCAAACGAATATTTTTCAGAGAGCCGACAAGAAGTTCCTTTAAT

AACTGGCCGTTTCGATTCACTGGAACAGGTTGATGCATTTACCAAATCCTTTTAGGAGGTACCAATGTCT

CTAGATAAAACTTATCCAATTTTCACTGTTAGATGGTTGGCTGTCCACGGATTAGCTGTACCTACGGTTT

TCTTCTTAGGATCCATATCAGCGATGCAATTTATTCAAAGATAGTTTTTACGTGAGCTTCGAATCTATGA

CACAACCAAATCCGAATAAACAGAGTGTAGAATTGAATCGTACAAGCCTTTACTGGGGACTATTACTGAT

TTTTGTACTTGCCGTTCCATTTTCTAATTATTTCTTCAATTAAAAATTGGAAAGAATTGTCAATCTCGAG

TGAAAAAGATCAAGATCCTAATTATTTGTGACTGTTCATGTCTCGAGTCATGACCAAGTGATGAAACCAA

AGTAGGGGAGGGGGAGGTGGGACAAATGACCAATACCACTGGAAGGATTCCTTTGTGGTTAATAGGTACT

GTAGCCGGTACACTTGTGATAGGCTCGCTGGGCATATTTTTTTACGGAGCCTATTCAGGATTAGGATCAT

CCCTTTGATAATGAATAATCGTTGAAGACTCTCTTTCACTTCATTTACAGATCAAGCAAAAAATTTGTGC

TGAATCTCACAAGATTTCCACTTTTTTGTTCCTCCTTCACGGTTCAAAAAAAAAAAAAGAAAAAGAATAA

ACAAAAAATTATTGTTCAATCTATCTATATCTATCTAGATATAGAGAAATATAGATAGATAAATATCACT

CCAATTATGACAATCCGCTGCCCGGACGTATCGCTCGGTGGTATTATAGGCTCATGATGCATCTTCTCTT

CTGAATAAACAAATTATTTGATCGATTCTTTGAAGAAGAATCGATCGAGGTCAAGTGTGATGAAACTAGC

TACAACTCATAGTTTTTACTATCAACATATAAATATTGACACAAATCTATATCACGGTTCGGAAAAAGTA

ATATGCGTTTGAAGAAATAGACTAGATAGAGTCACTCGAGAGGTTTTCGGATACAACTAATATATGTATA

GAAATCGTATTAATTTACAACCTGAAATAAAAAAGCGAGACTTCTTATTTTTACCTACTAGCAGTCTTTC

CAACCAATTCCTATTTTCTTTCTGTTGTTCCTTATCTCCTTTTTCTCATCCTTGTCGGTGTGTTCTTCCT

TCTACCGGACTCAGTAGAGTCGAATTATGGATACTGCACCGCAATCATTGGATCGAGAAGGGGAAGGATC

CCGGGTTTGGGTTACATCCAACCATCAATTGGTCGTTTAACGATGAGGGGGGGGGGGAAAGAAAGAGAAA

GAGGTATATAATCAAAAATTCATTTCCGCCAACTGGACCTTCTCAAACTGTTTTTTCTTAAGCACGAGAA

AGATCTGTGCCAGAGTAACCGATGCAAAAAAGACTAGGAGACCTTGAATACGCAACGGGTCTTGGAGTAC

AATTTCCACCTCTCCTTGACCAAATCCACCCACATTAGGATTATTAGTCAATGGCTGATCGGCTTTAACA

GATTCACCTTCCGAAATGATAAGTTCGGGACCGGGGGGAATAATATCAGTTGCTTCACGACCTTCGGATG

ATTCTTCGATAATTATTTCATATCCACCCTTTCCCTCTCTACGTACTACTTTTTTTATTTTTCCCATTAC

TGAAGCGGTATAAACTGTATTGTTGCTTTTACTCCCATCCGGATAGATTTGTCCCCTCCCCCTATTTCCC

CCGACATAAAGAGGGTATTTCAGGAAGTGTGCTTCTTTATTAGTAGTAGGGTCTGGTGAGAGAATCGGAA

ATACGATTTCACTATATAGTTTGCCCGGAACTGGACCTATCACGATTATATTCTTTTTGTCCGGGCGATA

GCTCTGGAACGAGAGTTTTCCCAGCTTTTCCTTCATTTCAGTTGGAATGCGATCGGAAGGAGCTAATTCA

AATCCTTCGGGTAGAATAAGAACAGCACCAACATTCAACCCACCCTTTTTACCATTTGCAAGTACTTATT

TTATCTACGTATCGTAGGGAATCTTAACAACTGCTTCAAATACAGTATTGGGAAGAACAGATTGCGGGGC

CTCGATATCCACAGGTTTCTTAGCTAAGTGGCAATTTGCGCATACAATACGCCCCGTAGCTTCTCGTGGA

TTTTCATAATTCTGTTGCGCAAGAATCGGATATGCGTTTGATACAGATGGACAGTTTACTTTACCAAAAC

TGATCGATACTAGAAATAATAGAATCAACCATTTTTTCATCCAGTTATTCGTAATTCTTTTTTGCATAGA

TTGATGATTGGTGCCAAGTCTTTGTGCAAACGGATCGTTTACCGATGCCGCATAGTATTAAATATTCTTC

CCTTATTCTAATTTTTTTATTCCCCTCTCTCCTTTTCTCTTCTCTTCTTCCCATTATTATTAAATAGTGA

AGAAGGGGAAGGTAGAAAAGTTGAATTCTTTTGATGAATAAGTCCAGCCCGTTAACTGCAATTTCGGTGT

AATATTTGTCATTCACTCATTGTGTGATAAGTGGCTACAATTGAGGGAGATGTGCGATTTAAATGACGAA

AAATCCAATACTTAAAGACTGTATCTGAAATAACCGGAAAGGTTGAAACGAAGCGAGAAATTACATATTT

ATTGGGGGCCAACCCAAAATGTTCAAAGGAGGAGCCTATAAAAATTTCCCAACCATGGGGGGAATGGAAC

CCTACACATAAATCAGTTAGTGGAAGAATAGAAAACGCTTTCATTGTGTCATTTAAGCTATAGAATAACT

CTTGAATCCGAGAATTTAGAACTGCAAGTCTCTTTCGACCCATTATGAACAAGAAGACTGGGATGGCGAT

GCTAATTACATCGGTTACTAATTGTAAGAGTAGTTCAATATTTGCTTCATTATACATTACTGCCAATCGA

ATAGTTTCGTTGTACGCATTTGTATCATAATTCGACAACTGCGTATCTACAGAATTTCCAGTCGCATCAT

TTAACCAAAGTAACGCTTCTACTTTCCGAAGCCGCTTCAGAGCCCTTTCCTCTTGAAAAGAATTGATAAA

GATTTGTGGTTGAGATGTGTTCCACCAACCCCTAATCCAAGGTTCTAGAAACCGATTCTTGAGACTGATT

GGGATCGTGAAAGGGAAAAGCAATAAACACCCAATATATCGAAGAGAAGCTAATGCTTGATTTTTAGCCA

ATCCAAAATCATTAAGTACTAATGAACTCGATTGACTCGTTGATTCCGCCTCGAATCTAGATAAAGTACG

AGTTACAGACCGAGGTACCAGACTTATAGATTCATAAGCCGCTGTACCGCCGGAAAAATCTGTTGATTCA

CAACCGAATGATTCCTCAATTGACTCTTCATTCGTTCGAAGTGACAAAGGGTTCGTGGAACAGCGTCCTC

CCTGAGGATCAGAATCATTCAAAGTTGCTTCAATCCAAGCTAATTTTCTATTCATTTTTTCTATAGTACT

CAAATTGTGACAGATAACTTTTTTTGCAGAAGCATAATAATGTTCCGATTCATCTTCTGGAAAACCGTCG

ATTATTTTTTGTTCCTCGTTCGTCTCATTACCCTTGTAGTAATTTTGGCGAGACCCTAAAGATAGTGCTC

GGAGAAGCGAAGTTTCTGGGAGATGTGGCGGAGACGTATCCAAACAATTTTTTGCTAGAAACTTATTTGT

GCGATGAGGAGGAACAGGGTGGTGTCCAATTAGCAACGACTGAGGAGACTTTGTTCCAAGAAGAAACCCC

AGGTTTTTTTGCATTCCCAATATGAATATGCTGAGTCTGCACTCTAGGAGACTCCAATATATTATAAATA

TAGATTTATTGAATTCCATGTTTGTAAGAGCTAAGACGGTCCGCAACGATTCTTTCAAAGGAGATGGTAT

TGTTTGTATGAGAAACGAAGATTCTTTCCTTAGATACCGTAGCTGCTTACTAGCCTCATAAGCTCTATCC

GAGGAACGGTGCGGAGTATTGTAAAACCGTTGAAGAAGTTTCCAATAATGTGATCTCATATGTTACTTGT

ATATAAGGAGGAGGGAGTCCGCAAAGTCTATTACTAACCAAATGAATCTTTGTAATTAGATTATCCTTTT

GGACCCTCCCCAGTTTTTTTCTTACTGTGCTACCTCACTTAGCTTTCACTCTGTTGATTATCTGATTCTT

AAATTATATGAAACTTCAAAAACCTTCGATGGATACGCGCAGGAAACGAGCAAGTTCGGCAGCTTCTTCT

TCCATCTCTCCCAAAGTTAAATCTTCACCGATCCGGGTTAGGGAGATATTCTGTCGACCCCTTACTCTAA

GGTAAAGAATTCGACGCGGATAAAGACCCTCTCGAATTTCCAATCCAACTGCTTCTACATCTTTCAGCAC

GAATCGGATACAGATCCGACGGTTCCTTCCAGGAAAGCCCCACCGAAAAATTGAGAATATTCCTTCCCGT

TTATCGAATAAATTGTATCCGCTGCCCACGTTCCGAAATACGGTACACCACGGGTAGAATCCGAGAAAGA

GGCCTGCGATGCCATAGAAACACATTACAATACCTTGTGGGATGAAAACAATCTGTTCGGACGAAAGTCC

GGGAATTAAATCTTTTCCGATGCAACTGGAAATTCCAACCAGCAAGAAACCTGTTGCGCCGCGGACGAGA

ATACAGGCCCAACACAAATTTGCAATTGTACGGGAACCTTTCACGGGATCTACTCGGATCCATTTGGAGT

GACAAGTCATTAATATTTCCTCAAAAATTGCATAATGAATCGATTATCCATCCGGTCACCAGCCTCAATT

CCCCCATGTTCTTTTTCCACAGTTCATGCAGTTTATTCCGGGAGGGGCTCTGTGCCTGATACATCTACGC

GTGATAATGAGGCGATGAGTCGTTAGAGTCTAAACATACAAATAGCTATCTACATGTGTCCTAGCGACAA

AGAAACAATCTACATCTCATTTATATGAGAAATGAAAATGAGACATAGATTGGAGTGGCATCGTTAAAGT

TTCCGAGTGATCAAACGAGTAGGAGGGGGTAGCCACTAATGAACCTTCGTCAGAAAAATCTGTCCAATCA

GCTATTAGCTAAGACTAATAATTGAAATTGATCCATATCACAGAGTCACCGAGCAGTTTCTCTCGTTTTT

AAAGACTGTGCAACAGAAAAGATTATAGAATTTCATCCCGCTCTATATAGAGAAATAAAAAAGCCATTGT

AATTGCTGGAAACACCAAACCAACTAGGGGTACAAAAATAGAGGGTAGATAGGACGCTGTCATGATGAAG

TTACCTCAAATAAAAAAAAAAATAGATATATATCTATCTATTTATACAATACTATATCTTCCTTTTATTT

CTACTTCTAATATCTAATGATAGTCTTTTTGTTCCATAAAGAAAAGGGGTTTCTGGACTTCTAATAGACT

TATCTCATTAAGAATTATTATTCTTCTTGCAAATTCTTCGGAGATAAGTACGCCCGTTACCAAGACACCT

ACGGTTTCGTTTATTATCGATTGAATAATCATGTATTATGCATCACATAGGAGTATCTCTCTATGTATAT

AGAGATAGATACTTCTTAGCGACTCCGAATCGGATTAGAACCCAAGATCTTACTAGTAGCCAACAAATCC

ATTATTTGGATACAGTCTCATCGTAGCACCATGTTTCTGATACCGTATCAAATAAAAGCGAAACAGTGAA

GTGACACCATTTTTCTTTTTTTTTTAGTAATCCGTTTGCTCCTTCTTATATCTTTCTCTCTTTTAAGAGA

AGAAATAAATAAATACTCATTTATTGATATAAAAGAAACATGATTTGGACCAATAAAAAGAAGGAATTTA

ATCTTTTTTATAAGGGGCTGAGTAATAAGGCTCAGATATCTCGCTCAAAACACCCTTCAGAAGGTTACGT

GGAACAATCAAATCGAGTAGTCCATTATCAAATAAAGATTCAGCCGCTTGAAAGCCATCAGGTATCTTTT

GGCGTGATGTTTATTCAATTACCCTTTTACCGGCGAATGCTGTATATGCTTTAGACTCGGCAATAATTAT

GTCCCCTGACATACCGGAACTAGCAGTGACACCACCCGTAGTTGGATAAGTAAGAACCGATATATAGAGC

AATCTCTTTTGAACTTGATGGATTTGCAGAACGGAAGAAATCTTAGCCATTTGCATTAAACTTAACGTTC

CTTCTTGCATACGTGCTCCGCCAGAAGCACAGATTATAATTAGTGGCAGAGACTCATGTGTAGCATATTC

GATTGAGCGGGTAATCTTCTCGCCTACTACGGAACCCATACTTCCCCCCATGAAGTGAAAGTCCATAACA

CCAAGCGCAATAGGTTTTCCATTTAGATATCCTATACCTGTTTGAACAGCATCAGTTAAACCCGTTTTTT

CTTGAGAAGTAGTGATACGATTCTGATAAGAATCCTCATCGGAGAAAGCTAAAACATCTTTTGCAGTCGT

GTCTTCATCCATGGGAATCCAAGTGTCGCGATCAATTGGAAGTTCGATCCTTTCCATACTATTCATTGAA

AGATGATAACCGCACTCTTCACGAACACTCTTATTCTGTTTCAAAAATTTCACGTGAAGCATGTTCCCAC

AGTTATCACACCGAGCCCATAATCCCTTATTCGTATTGATACTTATCCGTCTATCCCTCTCCCTTTCACT

TGAAATTGAGCCTTTGGTAGCTTCTTCGAGGAAAGCTCCGATCAATCCACCGAATTTGCGTTTATCTTCA

AACCAATTTATTACAGACGTAAAAATATCCTCATCTGTTTTTGCCCTTCAGCTCGGGGAATTGAAAAAAA

AAAAAAAAAAAAGAGTTCAAGTTGTTCGGATTCCACTTCATCAACGAAATAGGCGAAGAGCTATTTAAAT

ATCTAATGAAACATCAAAATCATTGTCTGATTGGAATAGATACCAATTTGGGACCGACCCCGGGTTCAGT

AGCCCAATAACTAATTGGCAATTGAATAATCATCCATCCGATCAATCATATGTTAGAAGCTTGAAATCGA

TTATCCAACAATATGTTGTAAAACGATACATCGTAAAACTCTTACTAGTAAACTGTTGATTCGATTTCAC

ACTACTCGTCCGTATCTCGTGGTTCTTAAATATGAATTGGTAGGGATTCGAACCCCCGGATCCACGGCTC

GAAACCATGTACTCTCATCCACTGAGCAACCAACCCTAATCTGTGACACATGGGGAGTATGGGAAAAAAA

TAAAAAAAAAAAATAGATCTCTCCCGATACCCCCCATCCGTTTCATGAATCCCTTGGAAGGACTGATAGT

ATCAAATAGTTAAGAAAATTACAATGTATCAATTGTCTCAAATTCAAATTTGATTTCTTTCCATACCTCG

CAGGCGGCAGCCAATTCAGGACTCCACTTACTAGCTTCACGGATAATTTCATTACCTTCACGAGCAAGGT

CACGGCCCTCATTACGAGCTTGTACACAAGCCTCTAACGCGACTCGATTAGCTACGGCACCGGGCGCATT

TCCCCAAGGATGTCCCAAGGTTCCTCCGCCGAACTGTAAGACAGAATCGTCCCCGAAGATTTCGGTTAGA

GCAGGCATATGCCATACGTGGATACCCCCCGAAGCTACGGGAAGTACGCCCGGCATAGATACCCAATCTT

GGGTGAAATAGATGCCGCGGCTACGGTCTTTTTCAATATAATCGTCACGAAGCAAATCGACAAAACCCAA

AGTGACTTCTCGTTCTCCCTCTAGTTTGCCTACTACAGTCCCAGCGTGAATATGATCTCCACCGGACATA

CGTAATGCTTTTGCTAATACACGAAAATGTATACCGTGATTTTTCTGTCTATCGATGACAGCATGCATTG

CACGGTGAATGTGAAGAAGCAGCCCATTATCTCGACAATAGAAGGCCAAGCTAGTATTTGCGGTAAACCC

TCCGGTCAGATAGTCATGCATTACAATTGGTGCCCCCAATTCTCTAGCAAAACGGGCCCTTTTCAACATT

TCTTCACACGTACCTGCAGTAGCGTTTAAGTAATGTCCCTTAATTTCGCCCGTTTCGGCCTGAGATTTGA

AGAGAGCTTCTGCTACGAATAAGAAACGATCTCTCCAACGCATGAATGGTTGGGAATTTACGTTCTCATC

ATCCTTGGTGAAGTCAAGTCCACCACGGAGACATTCATAAACGGCTCTCCCATAATTTTTAGCGGATAAG

CCCAATTTTGGCTTGATTGTACATCCTAATAAGGGACGCCCATATTTGTTTAGCTTATCCCTTTCAACCT

GGATACCATGGGGCGGTCCAATGAAAGTTTTAGAATAAGCAGGAGGAATTCGAAGATCTTCTAAGCGGAG

AGCGCGTAAGGCCTTGAATCCAAAAACGTTACCTACAATGGAAGTGAACATATTGGTAACGGAACCTTCT

TCAAATAGATCCAAAGGATAAGCTACATATGCAATATACTGATTATCCTCCCCAGCAACAGGTTCGATAT

CATAGCATCGGCCTTTGTAGCGATCGAGACTAGTAAGTCCATCCGTCCATACAGTGGTCCATGTACCTGT

GGAAGATTCCGCAGCTACTGCAGCTCCAGCTTCCTCAGGCGGTACTCCGGGTTGCGGGGTCATTCGAAAG

GCTGCCAAGATATCGGTGTCTTTGGTCTCATACTTGGGAGTGTAATAGGTCAATCGATAATCTTTAACAC

CAGCTTTGAATCCAACACCTGCTTTAGTCTCCGTTTGTGGTGACATGGGTTCCTCCCTATGACTAAATTA

GTAAATCTTGCAAGGATGAGATCTGCTCGACATAGGTGGAGTATTTCGATGTGAAACGTAAAGTGGGTTT

CGGTAATTCAACCTGCGCGCGATACTTATACGTGTCGAAACTCCATTTCAATCATGGAACATTACTATTT

TATATTGCGTTTCATGCGGAGTGCAACTAACTACTATGGTTTCTTGCAAAAATCGCTTGATAAATAAGAT

TCTATCCCATCCCAATACATTGACTCAGGAATCTCTTCATGGTTAGACTGGTCGATAGAAGAAAGAAAGG

GATCGACCAAATGTCTGGTCCGTTTAAAAAAAAAAAAATACAAAAATTAAAAATGAAGATTCAATGGATA

AAACATGATGGTCGCATGTAACAGAGTGGACTTATTCATATTTTATTAGTCCTTGAATAACAAAAAAAAG

AATTATCCTAGCTCTACGGCAACTTTTGCCCATCTCGCTGTTCCATCTATCTCTAGCTATATTTACGAGA

AAAGGGAAAAAGGAGTTTGGAACTACTGACTCTTTATTCACGACCGATCGGCGACGAAATACCAGATATT

TTTATCGATTCAGTAATCAAATAAAGATAATACACCAAATTAGTTATGAAAACTAGCTCTCTTTCTTTCG

AAATTTCCGAATTGGTGGAAAACAATGTAGGATACATTACTCAGATCATTGGACCAGTATTAGATGTGGC

TCCTTCTCCGGGGAAAATGCCCAATATTTACAATTCATTAATAGTTAAGGGACGTAACCCGGCGGGTCAA

GAGATTAATGTTACTTGTGAAGTCCAACAATTGCTAGGCAATAATGAAGTCAGAGCCGTAGCTATGAGTG

CTACAGATGGTTTAATGAGAGGTATGGGTGCTGTTGATACAGGAGCCCCTCTTAGTGTTCCTGTTGGTGA

AATTACTCCTGGCCGAATCTCTAACGTCCTTGGCGAACCTGTGGATAATCTGGGTCCTGTAGAGAGTAGT

ACAACATTTCCAATTCACAGGTCCGCCCCGGCATTTACCCAATTGGATACTAAACTATCGATTTTTGAGA

CGGGGATTAAGGTTGTAGACCTTTTGGCTCCATATCGCCGAGGCGGAAAGATTGGATTATTTGGGGGGGC

CGGAGTTGGAAAAACGGTTCTTATTATGGAATTAATCAATAATATTGCCAAAGCTCATGGAGGTGTATCT

GTATCCGGTGGGGTAGGGGAACGTACACGTGAAGGTAATGATCTTTACATGGAGACGAAAGAATCGAAAG

TTATTAATGAACAAAATATATCAGAATCAAAGGTGGCTCTGGTTTATGGTCAGATGAATGAACCACCAGG

AGCTCGTATGCGAGTTGGCTCAACCGCCCCAACAATGGCAGAATATTTTCGAGATGTCAATAAGCAAGAT

GTACTTTTATTCATTGACAACATCTTTCGTTTTGTCCAAGCGGGATCAGAAGTCTCTGCGTTATCGGGTA

GAATGCCTTCCGCCGTGGGTTATCAACCGACCCTTGGTACAGAAATGGGGTCTCTACAGGAAAGAATTAC

TTCCACCAAAGAAGGATCAATAACTTCCATTCAAGCTGTTTACGTACCTGCAGATGATCCGACTGACCCA

GCCCCCGCTACAACATTTGCACACTTAGATGCTACTACTGTGCTTTCGAGAGGATTAGCAGCAAAAGGTA

TTTATCCGGCCGTAGACCCCCTGGATTCGACCTCAACCATGTTACAACCTTGGATTGTAGGTGAGGAGCA

TTATGAGACGGCACAGGGAGTTAAACAGACTTTGCAGCGTTACAAGGAACCTCAAGATATTATAGCTATT

CCCGGACTGGACGAATTATCCGAGGAAGACCGTTTAACGGTAGCTAGAGCTCGAAAAATAGAACGTTTCT

TATCACAACCTTTTCTTGTAGCAGAAGTCTTTACTGGTTCCCCAGGTAAATATGTTAGTTTACTAGAAAC

AATTAAGGGATTTCAAATGATTCTTCCTGGAGAATTGGATAATCTCCCTGAACAAGCTTCTTATTTGGTT

GGTAATATCGATGAAGCTACCGCAAAGGCTGCAACTTTACAAGTGGAGGGTCAATGAGAGGGATGGTATC

AAATCTTCGCGTAATGGCTCCTAATCGAATCGTTTGGAATTCTGAGGTTTGGGAGATTGTTTCATCCACT

AATAGTGGTCAGATTGGTATATTACCTAACCACGCGCCGCTTCTTACAGCTTTGGATATGGGAGTCCCAA

GAATACGTCACGATGGACAGTGGTCCACGATGGCGCTGATGGGCGGTTTTGCTATGATAGATAATAATCA

GGTAACAATACTAGTTAACGAAGCAGAACGAGCTACCGAGATTGACCCTGACGAAGCTCGAAAAAGTTTC

CAGACGGCTCAAGCTAACTCAGCTAAAGCAGAGGGCAAGAAGAGAGTAATAGAAGCTAATTTAGCATTTA

AGAGAGCCAAGGCACGATTAGAGGCTTTAAACGCTAGTTAATCCGCTTCTTCTTCTGACCCCGCGGGGAT

AAAGACCAAAATTCAATGTGATACAGAATGTATTGAGTGACCTGATAGTCGCATCATAGCGCCATAGTAC

TACGTGGTTTCGATATGTATCTTAAATATCTGTAGAACTTATTAGATATCAATACAAAACTTATGGTATC

TAATAAGTTTTACCTACTATTGGATTCGAACCAATGCCTCTCGCCGTATGAAAGCGATACTCTAACCGCT

GAGTTAAGTAGGCTGGTGATATTTTCCTTACACGGCTCTATTCTATATATATATATATTATATATAGCAG

TGTATTTAGAAACAACTACATATTTATGGAAAAACATCTGATTTCCTTTGTTTGAAACAGAAATTAGTCT

TTCTTTTTTTTTTGCAATTGGTTATATGACTTGACAAGAATCAGTCGATATTGATACAATATTTATCGTA

TGATCAAACTGATCAAGGGCTATAGCTCAGCGGTAGAGCGCCTCGTTTACACGTGCGCCGATGGTTATTT

TTAGAAGGGTTTATTGGGACTCACCCGATTCGCGCAGGATCCTGCATGATAGATTTCTGTCTTACCTCAC

TGAGAGATGCAAAAGAACAGTAGCATGACAGATAAATTGATCAGAAAAAGATCAATTTAAAATAGTTGAT

ATGGTGGATGAGTGATCTATCCAATGCTGTAGATGGTGGGGCCGATGCGAGGACCCCAACAAGATCTCTT

CCTCGTCTTACGAACTTTCGGGTGTAAAGAGTATCGTATATTCTTTCCAAGCGACAGAGAATATTCAATA

GTACGAAGTGGATCTGTGTCTGCTAGAGGCAAACCTGTGTCAACACTAGTAACCTTCTCAAAATACTTCG

GGATTGCTTCATCTATATTTAAAATAAAAAGAAAAATCTAATAAAATAAATTAGTCGAGCACACGGAACC

ATCTTATTTGGTGGAACAAAGGTTGGTGCATCAGCAATTGTTCGTTCATCCCAACTGAAGTGGGAGAACA

GTTGGTAAGAGAGCCCAATGCTGCGAAAGCGGCATGTTGGGTTCGTTAAGCAGTTCAAGAATATTCTTTA

TATATTCCGATCTGCATTACCGAGAATGTCTACGGTTCGAATCCGTATAGCCCTAACCTGCGAAAACAAC

TCATTCATCTGTTACAGTATACTCAAGTGACGTCGAATCCGGATCATTACATTCCTAGATTCAATTTGCC

AAACTAATTTTTTTTTTTATTGATAAAAAAAAAATGAAATAGACTCAAAAAAATATGTTTATTTTTGAGT

CTATTTCATTAACTGGGTTGGTAAGACGGATAGATGGCCACTCAGAGAGAATGAGTATCCTAACATAATA

GATTAATTATATCTGACGTTTCTTTTGTAGTCCCTTTCTCGATTGGATAACTACCAATATCACAGGATTT

ATGAACCTTACCTCACCTTCCCCAAAAAACCTATACGTGTTACACCTATTGTGGTATAGCAAGATGATAA

CTTTCAAACCGAAAGGAGTATGTAAATGTTTTTGCTCCATAAACACGATTCTTTTTGGATTTTTCTACTA

ATATCTATATCTATTCCCTATTTAGCTTTTTTGATTCCCCGACTTCTCGCCCCCATCCGAGAGGGACCAG

AAAAATTGGCAAGTTACGAGTCGGGTATTGAACCAAAGGGAAATACCTGGATTCGATTCCAGATCCGTTA

TTACATGTTTGCTTCGGTATTTGCAATCTCCGACGTCGAGACAGTCTTTCTTTATCCTTGGGCTATAGGT

TTCAGGGAATTGGGTCTATTCGCCTTCATTGAAGTGATCATCCTTATACTTATATTAATTGTTGGTTCGG

TTCATGCATGGAGAAAAGGAGCATTGGAATGGTCTCAAGTCCCGAATATTCTAGTGAGAAAAGCAAAAGC

AGAGTTGACCCTCGCGAAAATATTTTTATCAATTCAATAGAGTCTATGTTCCCCGATCGGGGCGCGTCGA

ATTCAATTCTTTTAGCTAACATTAATGATTTTTCCAATTGGTCAAGACTGTCTAGTTTATGGCCACTCCT

ATATGGCACTAGCTGCTGCTTCATCGAATTCGCCTCTCTAATCGGTTCACGATTTGACTTCGACCGATAT

GGTTTAGTACCCAGATCCAGTCCTAGACAGGCGGACCTTATTGTGACAGCCGGTACGATAACTATGAAAA

TGGCCCCGTCCCTGGTAAGACTATACGAACAAATGCCCGAACCAAAATATGTAATTGCTATGGGAGCTTG

CACCATTACAGGAGGCATGTTTAGTACAGATTCCTACAGTACCGTTCGCGGGGTAGACAAATTAATTCCC

GTGGACCTTTATTTACCGGGTTGCCCACCCAAGCCTGAAGCTATTATTGATGCTGTGACGAAACTTCGCA

AGAAAATGGCTCGGGAAAACTATAAGGGTCAAACTTATCGTCACACTCGAAAGAAATATTTCAGTCTGAA

TCACCGACTTCATTTCGTACCCAGTATTCATACTGAGGAATATAATCAACAAATAGCTAATCAGCGCACA

AAATCCTTGTTAAATAGTTTTTTGGGAGGTTCAGAGAAGCTTAAATCTAAGTTTGAAGAATCAATATCAA

AAACCGATGAGTAAATCTAGTTTAGAAGTAGAAAGAAAAAAAGGTATTAACCAATATGAATACTATTGAT

AGATATGAGTTCAATATCGAGGCGCAGGGTCGATTATCTGCTTGGTCGACTAGGCACAGGTTCGCCCACA

GACCTTTAGGTTATGATTATAGGGGTGTCGAGACCTTGCAGGTCAAAGCAGAGGAGTGGCTGTCTGTAGC

TGTTGCTCCATACGTGTGTGGTTTCAATTATCTGCGTTCCCAATGTGCTTATGATGCGGCACCGGGAGGA

CCCTTAGTGAGCGTGTATCATCTCACGCAGGTGCAAGATGAGGCAGATCAACCGGAAGAAGTATGTATAA

AGATCTTCGTTCCCAGAGAGAACCCCAGGATCCCATCGGTTTATTGGGTTTGGAAAAGTTCCGACTTCCA

GGAACGGGAATCTTTTGATATGTTGGGAATCAGTCATCAGGGTCATCCACACCTTAAGCGTATATTGATG

CCCGAGAGTTGGATCGGATGGCCTTTGCGTAAAGATTATGTCGTACCCAACTTTTATGAGTTACAGGATG

CCTATCAGGTTGCGTAGAAACGGAAGGGCCTTAGTCTTCGTTAAAGAATCATCCTCCTGTTCATCATTTC

CATTTGATTCTTATTAGGAATGTTTACTGAGCGAAGCCCGAATGATCCGTCGATTTTTCAAGATACTTCT

GCATCTGGTCCCTCGTCCATTTCATATTTTAAAAGTCTCTTCATAGAAGAATCTCTTTCGTGTTATCGGA

TCAGACTATTCTTTTTCTTTTATTTATCTGCCAGGAACCAGACTTGAACTGGTGACACGAGGATTTTCAG

TCCTCTGCTCTACCGACTGAGCTATCCCGGCCAACGTCTCTACGGAGATGCCTCAAATCCAAATGAGGCA

GATATCTTTTTTATTCGATCTATCTCTGCTCAATCAAACCAATAGCCTCGGTAAAAAAAAAAAAATAGTC

GTTTGTTTAATATTTCCTATAGTTTTCAAATGAACCACTCAAAAAGTCTTTTAGGCTTGCTCAGTGGTTC

ATTTGTGATCCATACTCAAATAAAAGGTTAAAGTCGAAAGAACAGGGTATTAAGCTAAATTTATCGAGCT

CTGAATCAAAGATCTAAGATTTACTACTCCCCTCAATAGTTTGGAGGGGGTGAGATAACCATATGAACCC

GAACAATCTATCTATAGATTGGCAATTCTACCCTGTTCTGTTGGGGATAGAGGGACTTGAACCCTCACGG

TCCTATAAAGACCAACGGATTTTCTTTCTACCACAATTTGCATTGCTACTTACACTAACCGTGTAGAATG

GGACTCTATCTTTATCCACGAAAACATTATTAGCTACTACTTGTCAAGGAGTATTCATTAAAATACAACG

GGAGACAGGCACTGTAACAGGTAGAAAAGGAATATGAAAATTAGTAGGAATAGACTCTATCTTTTATATA

CTATAGATTCAAATATTGGCGTGATTCTGCGAACGAATGTCGACTCTAGATCGAAACAGGGGTCGCGCTC

GATCCTTATCTAACTAGAAAAGCTTTTTTTTTTTTTTCACTTCTTCGTTTCATATTCCTGTATTTCATCT

CGTTCAATCACCCATCAATCACCCATATGGGGTAGTTAAATATTTAGTTACTGTAGAAATAAGAATTAAT

AGGTTGTTCGTTGGAATAGCCCCCGTCGAGTCTCTGTACCTATCTCGCTTCGTCATCTAAAATTTAGATA

GATGAAATGAGATTTGGCTCAGGATTGCCCGCGAAATAATCCTAGGTTCCCCTGAATCTGGGAGCTGTCA

CTCAGTACGTTTCCATACCTAGGCTCAATCTGATTGAGTCCGCAGCGTCTACCATTCCGCCATATCCCCC

CCCCCTTGGGCCCCAACAAACTGAAACAACAAATATAGAATTGACGAGAATCTCTCAGTATGCTATCTAC

TACCATGTCTTCTATTCCACCCGAGTCATAACCCCTCTATGAGTCTATTAAGTCTCATGGGGGAAAAACA

TATGCTTTGACTATGCGTCGGAATATCCTACTTCCTTACATCTTCGAGCCTTTTTCTTTTCTGACTAAAA

TAAGAAAAGATAACCATAATTTCGTTGATCTAGAAAGAATAGATACTTGTTTAGTAAGGGAATCTAATTA

GATTCCGCCTGTCGGTCACACCTTGCTAACCTATCAGACATCAGAATTATACATGAATGTACCAATTGGG

GCAATATAATATCCCAATCTATTCAATTTTTATTTCTGCTCCAATTATTTATATGAATGGGTATGCTACA

GGGTTTTCGTTCGATACGAATTATGGCTCAATATTGATTGTTTGTTTATCACGCCCCCCTTCTTCTTTTC

AAGAGTTGATAACAACTTGAGTATTTGTGAGTTCTCAATCATATGTTATGATTGTCACAAACAATAATAG

TTAATGAAATTGATTGAGTATTACTTCATAAATAGTATTTTCAAACCAATCCCCGAAAATTTTATTTTCA

CTTATGAAACGTTTACAGAAAAGGAGTTTTTACGTCTCGCTACCGAGGACCTCGTCTGAAAGTGATACGT

CGTCTAAAGAATTTACCAGGGCTTACAGGGAAAACATCCAATCCAGGAGAAACTCGAATTGCTGCTGATC

AATCTGCTTCGAGAAAAATTTCTCAATTCTGCGTGCGTTTGGAGGCCAAACAGAGATTACGTTTTAATTA

TGGATTAACAGAACGCTAATTACTTAGATATGTTCGTATTGCTAGAAAAACTAAGGGTTCGACAGGCCAG

GTACCGTTGCAATTACTTGAAATGCGTTTAGATAATATTATTTTTCATTCAGGTATGACTTCCACTATTC

CTGCAGCTAGACAATTAGTTAATCATAGACACATCTTAGTGAACGACCGCATTGTGGATGTACCAAGCTA

CCGTTGTAAACCGAAAGATATTATTACTGTTCGGAATCGACCAACTTCCTATAATGGGCTGAGGAGTGGC

ATTAATGAGTCTTCTCGAGGGGACGAAATACCGGATCATTTAACTTTTTCTCTATTGGAAGGCAACAGAC

CAAAGGGGTTGGTGAATCGGATTGCCAATCGGGAATCTATCGATTTGAATATCAATGAATTGTTAGTTGT

CGAGTATTATTCTCGCAAAGCTTAACCCTAAGTGATTTCTGATTTATTTAAGAATTCAAGAAATTAATAG

AATAATTTGAGAATCCTTGTTACAAGGATTCTTAGGTAGTCTAATCAAAATAACAAGTAGATAACTAAAA

AGTTAAAGGGATTTTTCCGGTACATCTGATTCATTTCTTTTAGCAGAAACCAACCCCCAATGTTGTACTT

TAGAATCTTCTAGTTTCAAAAAGGTTAAATCGACGCACCATACAATATTCCGAGCCACCAATACGGGTGA

TTTCAAACAATAAATAATTCTATTACCAATAGATTATCAATAGACTGTTAGGATCCCTTACCGTTATCAA

GTGTTCCTTCGGTATTAGTCGAAACTATTACTCCAGACTAATCTCAGATTTCTGATGAATTAGCAACTTA

CCAAGATATTGTAATTGAAAAAAAAAAAGAGGGAGACACAAATAGATAAAAATATGGAGAGGAAGGAGAG

GGATTCGAACCCTCGGTAAACAAAAGTCTACTTAGCATTTCCGGTGCTACACCTTAAACCGCTCGGTCAC

CCTTCCTGTAGGATTTGATTCCCCAAATGCTCTGACATATTTTAGACATTTAGGTAGCAAAATGACAAGT

TAGTGGTCAATGATAATTAGAAAGAAATAATTTTTGAAATATAAGTTTAGGATTCACCAGGTATTAAAAA

CGAGGATTAATGCTCAAGGTTGAGATAAAAAAAAAGAACGAGATTCGACATATATATCTTTAGTCATTCT

AAAATATATTTTCATACATCCTCGATCCCTTTAAATGAGTAGATTTTGATGGGACAATATGGGATAGGTA

TCGTTGTAGGAATAGGCCCAAGTTGTTCATCGGTTTCTTACGAGCCTGGACGCTTTTTCTATCTCTAAAA

AAAAAAAATGAAGTACATAAACATTAGAGAGATATACAACGTGCCTTATCGCTTTATTACTCTTTTTGTT

TTTTTTTTGTAACCTTGATTAATATAATAATAAGTGGAATGTGATAGAGAAAAAAAAAAAAAAACAAAAA

AATTAGAATTGATTATGCCTAGATCTCAGAGAAATGACAATTTTATTGACAAAACTTTCACAATTCTAGC

AGATATTTTGTTACAAATTCTACCGACCACTAAAAGAGAAAGGGAAGCTTTTACTTATTATAGGGATGGT

GCGATTCGAGAGGGGAAACAATTCGGACCTATTCAGAATGAATTGAGAAGGTTCCAGTCTCAATAGACCC

ACATTTGGTGAAGGTGTGTTTTGATTGGGAAACAAGTCCTTCGGTCGCGCATCCACGATTGATGCAGCCT

TGGATGCTACAGCTCCAATTCCCGACGGATCTTGGTATCAAGCAAAAGGTTAAACCTATGAAATAATATG

TGATGAATGGGTTCATGGGTAAGCATGGGAGGGGGGGGGGGCGCCACGTGTAGGAATCGACAATCCAAAG

GCTTCGTTAAATTCCAGTTTCGCCACGTATAAGACCTTTCCGACAATTCTCAAATCGTGGCAACTATCGA

TAGTGATTGGGACAACAAACAGCCATCCCGTTTGTGTTTTGGATGCCCTTAGAATCATCGAAGATTGTCG

AGGTGAGTAATCCCCTCAAAACACAAAGCGTTGGGAACGAAGAAATTGTCAAAGAGTTTATTGATAGTAT

CATATTATAGTAATTATCTCAATAAAAAACTCTTTGCAAGAAGGATGGTTAGACATTAGTTTCAGGAGAC

ACTAGCCCCCGCTTAACTAGGTTAGGGGTAGGAATAATTAGACTATTCCAAATACTATTTTCCCTCCGTG

CATCAAGCGGGAGGAGCCGTATGAGATGGGAATCTCACGTACGGTTTTGGAGCGGAGCCTATTTGCATTA

GCAACCGTAACGGATGTCAGCCCAATCTGAAGGAGAATATGCAGAAGCTTCATAAAATTACTACAAAGCT

ATGCGTTTAGAGATTGATTCTTACGATCGGAGTTACATACTTTATAATATAGGTCTTACTCATACTAGTA

ATGGGAAACATGCGAAAGCTTTGGAATACTATTTTCAAGCATTGGAGCGGAATTCTTTTCTGCCACAAGC

TCTTAATAATATGGCTGTGATCCGTCACCACGTGCGATTATCTACACTTTAGGATCTTTTAGTTTGTAAC

TAACTATTCAACCAAAGAAAAAGGCTTCCCACAAGCATACTTCCGAACAAAAGTTGTCACAAGCTGTGGA

ATCCAGTACCCCCCCCCTCCCTGAAGCAACCCAGGTTTGAGAGAGGAAGATAGCCTAACTATCCCATGGA

TAATTGACTGAATCGAAGGATATAGCACCGTAAAGATTCATCATTGAAAATCTGGGTCGATACGATGAGA

TTGGTCCACCCAAAAAGTTATACAATTTAGCTCTGTAGCAGAGTTGATTGGGGAAAAAGAAATAGCGAAC

CACGGTGTAGCATCAAATCCCAAAGGAAGAATCTATCTAAATGGATCCGTATTAAGAATAGGATAGTTAG

CTTTGAGAAAAAAAAAAAAGAAAGATTATTAGTTTTTTTTCTTAACTAGGAGTATGGAAAAGATTCTATT

CGAGAGGAATGAAATTAGAAACCCCTATCAGTGACTATTCTTAGTCCCTTCACAAATCAGGAGTAACCCT

TTCTTCTATCTCTTGATTGGACAGACAAGAGGCTAATGAGTAATCATTCGAGCCGTATGAGGTAGGAAAC

TCTCAAGTTCGGTTCTAAGGGAGGAGATCGTGGAATAATCTATCCATCCTGACCGAGGGGAGCAGGCCAT

TCAACAAGGAGACTCAGAGATTTCAGAAGCTTGGTTCGATCAAGCTGCTGAGTATTGGAAACAAGCAATA

GCACCTTCCCCCAGTAATTACATTGAAGCACAGAATCGGTTAAAAATTACAGGACGTTCTTTTTTCCTTA

GTGAGTGAAGCGACATACATGAAAAAATTTTCTTGCTTACCCAACCCCCCACCCAGTCACACTTCGCTTA

TTCTCTACTACCGAACGAATGATCGATATTGCAAAGTCCATCGGGCACTAGTAGGTTGTGTAATAATAAG

ATTAAATGCCTGCCCCGCATAACTCTTCTATCGCAGCTGCTCCAGTTCCAAACTCAAGGGGAAAAAGAAT

ACTTTACTAGTTAGTAGTAAAAATTCTAGTTCTTAGAAGTTTTGTATCCTCTGTTGGTAGGTTGTTGTTA

TCCCTCGTCCGAAGAGAGGAGAGTCTCGATGACTATTCGTTCACCAGAACCAGAAGTCAAGATTATGGTG

GAAAAGGATCCCGTGAAAACCTCTTTCGAGAAATGGGCTCAACCTGGACATTTCTCGAGAAATTTGGCTA

AGGGTCCTAGTACCACCACATGGATTTGGAATCTACATGCTGATGCTCATGATTTTGATAGTCATACCAA

TGATTCAGAGGATATATCCCGTAAAATATTTAGCGCTCATTTTGGTCAACTAGCTATTATTTTCATCCGG

TTGAGCGGTATGTATTTTCACGGGGCTCGTTTCTCCAATTACGAGGCATGGCTAAATGACCCTACTCACG

TTAAGCCTAGCGCTCAGGTGGTTTGGCCAATAGTGGGTCAAGAGATACTTAATGGGGATGTGGGCGGGGG

ATTTCAAGGAGTACAGATAACGTCCGGATTCTTTCAACTTTGGCGAGCTTCCGGAATAACTAATGAGTTA

CAGCTCTATTGCACAGCAATCGGTGCTTTAATCTTTGCGGGATTAATGTTCTTTGCTGGTTGGTTTCATT

ACCACAAGGCTGCTCCAAAATTGGCCTGGTTCCAAAATGTAGAATCCATGCTGAATCACCATCTAGCAGG

TCTCTTGGGGTTGGGTTCTCTAGGGTGGGCGGGACATCAGATACACGTTTCGCTACCGATTAACCAACTA

TTAGATGCGGGAGTTGACCCCAAAGAAATACCCCTTCCTCATGAATCTATTCTTAATCGTGATCTTTTGG

CTCAAACGTATCCTAGTTTTACAAAAGGATTAATCCCATTTTTCACTCTTGACTGGTCAGAATACTCAGA

TTTTTTAACCTTCCGCGGGGGATTGAATCCAGTTACTGGGGGATTGTGGCTGACCGATACCGCACATCAC

CATCTAGCCATTGCAGTTCTTTTCTTGGTAGCTGGTCATATGTATAGAACCAATTGGGGTATTGGACACA

GTACGAAAGAGATTTTGGAAGCTCATAAAGGCCCCTTCACTGGTGAGGGTCACAAGGGTCTTTATGAAAT

TTTAACCACTTCGTGGCATGCTCAATTATCTATTAATCTTGCCCTGCTAGGCTCTTTAACAATTATAGTT

GCCCATCACATGTACGCTATGCCACCTTATCCGTACTTAGCCACCGATTATGCTACACAACTTTCCTTGT

TTACACATCACATGTGGATCGGGGGTTTCTTAGTAGTTGGCGCGGCTGCACACGCAGCTATTTTTATGGT

AAGGGATTATGATCCGACTACTCAATATAACAATCTGTTAGATCGTGTCATTCGGCATCGTGATGCAATA

ATTTCACATCTTAACTGGGTCTGCATCTTTCTAGGTTTCCATAGTTTCGGCCTATACATTCATAACGATA

CTATGAGTGCTTTGGGACGTCCCCAAGATATGTTTTCAGATACCGCTATTCAGTTACAACCCATATTTGC

TCAGTGGGTGCAAAATACTCATGCTTCCGCTCCTGGTTCAACAGCACCTAATGCAGCGGCAGGTACTAGC

TTAACCTGGGGGGGTAGCGATTTAGTAGCAGTAGCTGGCAAAGTTGCTTTAGCACCAATTCCATTAGGTA

CTGCAGATTTCTTGGTACACCATATTCATGCATTTACAATTCATGTTACTGTATTAATCTCACTGAAAGG

TGTTCTGTTTGCACGCAGCTCCCGCCTAATACCTGATAAAGCAAATCTTGGTTTTCGTTTTCCTTGCGAC

GGTCCAGGTAGAGGAGGTACCTGTCAGGTATCTGCTTGGGATCACGTTTTCTTAGGGTTGTTCTGGATGT

ACAATTCCATCTCAGTAGTTATTTTTCACTTCAGTTGGAAGATGCAATCCGATGTACGGGGTAGTATAAG

TGAACAGGGAGCGGTGAGCCATATTACTGGGGGAAATTTTGCGCAGAGCTCAACTACTATTAATGGATGG

CTGCGTGACTTCTTGTGGGCACAAGCTTCCCAAGTCATTCAATCATATGGTTCCTCGTTATCCGCATATG

GTCTTCTATTCTTGGGGGCTCATTTTGTTTGGGCTTTCAGCCTAATGTTCCTATTCAGTGGTCGCGGATA

CTGGCAAGAACTCATTGAATCTATTGTTTGGGCTCATAATAAGCTGAAAGTTGCTCCTGTTACCCAACCT

AGGGCTCTGAGTATCATACAGGGACGTGCCGTAGGAGTAGCTCATTACCTTCTGGGTGGAATCGCCACAA

CATGGGCGTTCTTCCTAGCGAGAATCATTGCAGTGGGATAATGGCTAGGAGGATTTGAGAAACATTACGG

CATCAAGATTTCCAAAGTTCAGCCAGGGTCTATCCCAAGACCCAACTACTCGTCGTATCTGGTTCGGTAT

AGCCACTGCGCATGACTTTGAGAGTCATGACGATACTACCGAGGAGCGTCTCTATCAAAAAATATTTGCT

TCTCATTCCGGTCAATTAGCTATAATTTTTCTCTGGACCTCTGGGAATTTATTCCATGTGGCTCGGCAGG

GTAACTTCGAGGCATGGGTGAGGGACCCATTACATGTGAGACCAATTGCTCATGCAATTTGGGATCCTCA

TTTCGGTCAGCCAGCTGTCGAAGCTTATACTCGGGGGGGGGCTCCGGGTCCAGTGAATATTGCTTATTCT

GGTGTATATCAATGGTGGTACACCATTGGTTTACGTAACAACCAAGATCTCTATACTGGAGCTATCTTTT

TGCTAGCCGTTTCCGCTTCGTTCTTATTGGCTGGCTGGTTACACCTACAACCGAAATGGAAACCGGGCAT

TTCTTGGTTCAAAAATGCTGAATCTCGGCTCAACCACCATCTTTCAGGACTCTTCGGAGTGAGTTCTTTA

GCTTGGACAGGACATTTGATCCATGTAGCCATCCCCGAATCTAGGGGTGGACATGTGAGATGGGATAATC

TATTAACCGCAACCCCCCATCCTCAAGGCTTGGGACCCTTTTTCTCGGGTCAGTGGAGTGTTTACGCACA

GGATCCTGACTCTAGTAACCACTTGTTTAATAGTGCCCAAGGAGCAGGAACGGCTATTTCAACTTTTCTG

GGGGGATTTCATCCACAAACTCAAAGTTTATGGCTAACTGATATTGCTCATCATCATTTGGCAATTGCAG

CTGTGTTTATTATTGCTGGTCACACGTACAGGACTAACTCTGGTATTGGACATAGTATGAAAGAGATTTT

GGAGGCTCATATTCCTCCAGGCGGCAGGTTGGGGCGCGGACACAAGGGACTTTATGATACGGTCAATAAC

TCCCTCCATTTTCAACTAGGACTCGCTTTAGCCGCTTTAGGAGTCACCACTTCCCTAGTTGCGCAACATA

TGTATTCCTTACCTGCTTATGCTTTTATAGCGCAAGATTATACGACCCAAGCCGCACTATACACCCATCA

CCAATATATTGCCGGGTTTATTATGACAGGAGCCTTTGCACATGGGGCTATATTCTTTATTAGAGATTAC

GATCCGGTACAAAATAAGGATAACGTCTTAGCAAGAATGTTGGAACATAAAGAAGCAATAATAGCCCATT

TAAGTTGGGCTAGTTTATTCCTAGGGTTCCACACTCTAGGTCTTTACGTTCATAACGATGTAATGCTAGC

CTTCGGAACTCCGGAGAAGCAGATTCTTATTGAACCTGTATTTGCTCAATGGATCCAATCTGCTCACGGT

AAAGCTTTGTATGGTTTCGACGTACTTCTATCCTCAACAGATAGTCCAGCAATTAATGCCGGTCGGGGAT

TATGGTTACCCGGTTGGTTGGATGCTGTTAATAACAATAGTAACTCATTATTTCTAACGATTGGACCCGG

AGATTTTCTAGTTCACCATGCTATTGCTTTGGGTCTACACACAACTACACTGATTTTAGTGAAAGGTGCG

TTAGACGCGCGAGGGTCCAAGTTGATGCCAGATAAGAAAGAATTTGGTTACAGTTTCCCTTGCGACGGTC

CAGGTAGAGGTGGTACCTGCGACATTTCAGCTTGGGACGCCTTTTATTTAGCAGTTTTCTGGATGCTGAA

CACCATTGGATGGGTCACTTTCTATTGGCACTGGAAACATATCACCCTGTGGCAAGGTAATGTTGCTCAA

TTTAATGAATCCTCTACTTATTTGATGGGATGGTTGAGGGATTACTTACGGTTGAACTCTTCGCAACTTA

TTAATGGCTACAATCCATTCGGTATGAACAGTTTATCTGTATGGGCATGGATGTTCTTATTTGGACATCT

GGTGTGGGCCACTGGATTTATGTTTCTCATTTCCTGGCGTGGCTACTGGCAAGAACTCATTGAAACTCTA

GCTTGGGCCCACGAGCGTACACCCTTGGCAAATGTGATACGTTGGAAAGATAAACCAGTTGCTCTTTCTA

TTGTTCAAGCACGATTAGTGGGACTAGCCCACTTCTCTGTAGGTTACATATTTACCTACGCAGCTTTTCT

AATAGCATCTACATCAGGTAAATTTGGATAACTCTATCTCTCTCTGTTTCGACTAGCAAAGTGTCTATGC

GTCGGGCTCACCCCCACTAACCCCTACATCTGAGCCAATCGCAAGACCAACTATTCAGGGCTCAGTTAAT

ATAAAGAAATAATAAATTGATTTATTTCTTTATATTAACTGATAAATTAAGAACTTTGATTCAGATACGA

TCCATTTTAGAATAGTATTCCAACCCTGCTGACCTGTGAATTATGGCAAAGAAGAGTCTCATTGAGAAGG

AGAAGAAAAAAGAAAAATTGGTGAAAGAATATGATCTCATTCGTCAATCTTTGAAACAACAGATCAGAAA

GAGTTCATCAATCCAGGAAAAGATAAAGATTTCCAAAGGATTACAATCTCTACCGCGTAACAGTGCACCC

GCCCGTCTCCGTAAACGATGCTCCCTAACCGGACGACCCAGATCCAATTACCGAGATTCTGGTTTATCTA

GACACGTACTTCGCGAAATGGCACACACTTGTTTGCTACCTGGAGTAATAAAATCAAGTTGGTGAAAAAA

AGTATTATTCAATTAATAAAAAAGAAGAACAGATATTTATAGATTAACAGTTTTTCCTCATGTTCAATGT

AATTATTTAAGGAATGTATAATAATTACATTGAAGGCATCAACTACGCGGGGTAGAGCAGCTTGGTAGCT

CGCAAGGCTCATAACCTTGAGGTCACGGGTTCAAATCCTGTCTCCGCAAAGGAACCCGCTAATTCTCTAT

CTAATAGGGCGATAGGCCACCCTTCCCTATCGAGCTTACCGTAATCTCATTTTATCTCTCGTGTCCCAGT

GACGAATCAAACCCAAGACTCTACGAGTCTAGACCGGATAAATTTGAGTATTTCCGATATTTCCTAGGTT

ATGGTTATTTCACATCACACGACAAAAATAGTCTTTCAACCTTTTTTTACTCTTTCTACCCATTATTGGT

TAGAGAGAAAAATAGAAAAGAGGGTATAAAATTGAATTATCAACACAACTATCGTTTGCTTCGTCTCAGA

TCAACATTTTCTTTTACCAAGTTCTAGTATCTGGAAAGAAGAAAAAACGGAGCAAACAAAATAGTTTTGT

TTTTGTATGCCACGTAGAATTTCCCCCAATTATACCATTCAATTGGTAGGCCCTTTTAACTCAGTGGTAG

AGTACCGCCATGGTAAGGCGTAAGTCGTCGGTTCAAATCCGATAAGGGGCTGATCAAATAGTTGTACGAA

GCATCAAACTCGAGCTGTCTCTCTTTAACAGAAGCACCTGGGTCAGTAAGATCTGCGTGCGAAAGAACAG

TATTAGTATTGTCTCTTTCATTTTCAGGAAATGATGAGGATACTGGCGTTTAAACAGCTTTTTTTTTTTC

GAATGAAAAAAAAGGGTGGAATGATGATATTCCTTCAGACGCCCGTCAAATCAGAATCTATCAATTTTCC

TATTTACTATTTAATTGAACCTGAATCGAATCGACAAGATTATTGATAGATTGAGGGGGAAGAACAAAAA

AAAGGAGAAAAAGATTCATTTAATGGATAATCCTAGAATTGGTACGAGGCTAGCTCTCTTCAAAATAAAT

TCTTCAGTTGAATTGTTTGTCTCACCCTGATTCCTAATCGGAAATGTATCGTTACCCACGATACCGAAGA

ATCAAATGAATATAATTCCTAATATTAATAATTATTTAGTTATCCCTAGCGTGGGAATTAGATATGAATT

CTCAGTATCAATATATTTCTATTCAGTTAAAAAAAAAAAAAAAAAAATATTGGATAATCCTTTTTTCTGT

ATAGATAATTTCCAGTTATTGAGTCATTGAAGAATTCTTCAACTCTCTTAATTTATTAAGACTCCTGTTT

TTTATATTCCTCATATAATCAAAATTTATTTTTTTGGGAACTCGAAGCAGGGGTATAAACTGTTCGCTCA

ATGTCGATATTTTAAACACCTTTTCTATTCGAAGCTAGGTCGAAGTATGCCACTACTCATTCGCACGATT

CGGGACTAGAAAGCTTTCAATTTTTAGTGGAGATTGGTAAAATAATTATTGGGATGTTCCTAAAGTATAG

ATGAGTACCATAAAAATACAGATCAGATGGATCTATAGACATGCGTATACTATCTATACTACTAACCCTT

TCACGGATTATAAGAGACAAATTTCTTATTTGATCTTTTTTTTTTCGAACCCTTTTCTCTCTCTTCTTTT

ACCAGTAAAAAACGGATGAGAAAGAAAAAAAGTTGGAAGAAGATACTGGCACTGCGGGGGAAGATCTAAT

AGATGTCAATGATTGTTTGACGAAAAAAAAAAATAATATCTTTGGGACTCCATCCCAAAGTAGGGTCCGT

TAATACGGCAGAAGGGTTGACAAAATCTCGGAAGAAAAGAAAGGTTTACCCACTTTCTGAGGAATAACGT

AACAAACCATATTGTCTCGGGCCTAAGTCGATATTGATAGATTGAAAAAGAAGAGACGATTAAAAACGTA

AAATTAGATGAAAAAGAAAAAAAGGAAGAATAGTAAGGAGAAACACGGACAAAAAACTAGAGAGGAAGGA

AAAGAAAAAGAGAGAGAAAGGTAAGATAAAAAGAGTGATAAATAGTGGAATCAAAAACAAGAAGGAAGAG

AAAAAGCGAAAGACTCCTACTAAAATCTATCAGTATCATTCTCGTGCAATAACTGCCCTGCCGGGAGTAT

GCTGTTTCGGTGAACGATTTTTCAGAAGGGACGACGATGTGATGGTTCAATCTTCTGCAAAGTACCGTAA

CTATACTACTTCATAGGAGAAAGAAGGGAACCCAGAAATGGTTCGAGGAGCTGAGTGAGGGAATAACTAT

GACCATTGCCATTGGAAAATCTTCCAAGGAGCCGAAAGATTTATTTGATAGTATGGACGATTGGCTAAGA

AGAGATCGTTTTGTTTTCGTAGGCTGGTCCGGTCTATTACTCTTTCCCACCGCTTACTTTGCTTTAGGTG

GTTGGTTCACCGGTACAACCTTCGTCACCTCATGGTATACTCATGGATTAGCTAGTTCCTACTTGGAGGG

TTGTAACTTCTTGACTGCAGCAGTTTCAACTCCTGCTAATAGTTTAGCGCACTCCTTGCTTCTGTTATGG

GGTCCCGAAGCACAAGGAGATTTCACCCGTTGGTGCCAATTAGGAGGCCTATGGACCTTCGTTGCTCTTC

ATGGCTCCTTTGCTCTGATAGGTTTCATGTTACGTCAATTCGAACTTGCTAGGTCTGTACAATTACGTCC

CTACAACGCAATAGCGTTCTCCGCTCCTATTGCCGTTTTTGTCTCTGTATTCTTGATTTATCCCTTGGGG

CAATCCGGTCGGTTCTTCGCACCCAGTTTCGGTGTAGCAGCTATCTTTCGATTCATTCTCTTTTTTCAAG

GTTTTCATAATTGGACGTTAAACCCGTTCCATATGATGGGGGTTGCAGGCGTTCTTGGTGCTGCCCTTTT

ATGTGCCATTCATGGTGCTACAGTGGAAAACACTCTATTTGAAGATGGTGATGGTGCGAACACATTCCGC

GCGTTTAACCCAACTCAATCCGAAGAGACTCATTCAATGGTAACTGCTAATCGTTTCTGGTCCCAAATAT

TTGGTGTCGCTTTCTCCAACAAACGTTGGTTACACTTTTTCACGTTATTCGTGCCAGTGACCGGTTTATG

GATGAGTGCTATTGGAGTAGTTGGTCTCGCCCTGAATCTACGCGCGTACGACTTTGTTTCCCAAGAAATT

CGTGCAGCAGAAGATCCTGAGTTTGAGACTTTTTACACAAAGAACATCCTATTAAACGAAGGTATTCGCG

CTTGGATGGCAGCTCAGGATCAGCCTCACGAAAACCTTGTATTTCCCGAGGAGGTCTTACCCCGTGGAAA

CGCTCTTTAATGGAACCCTCTCTCTGGGTGGTCGCGATCAGGAAACCACAGGTTTCGCTTGGTGGGCCGG

TAACGCTCGACTCATTAATCTGTCTGGTAAATTACTTGGTGCCCACGTGGCTCATGCTGGTTTGATTGTA

TTTTGGGCCGGAGCTATGAATCTATTTGAAGTGGCTCATTTTGTTTCAGAAAAGCCTATGTATGAACAAG

GTTTAATCTTACTTCCTCACCTAGCTACCCTGGGTTGGGGAGTAGGTCCCGGGGGGGAAGTCACCGATAC

TTTCCCATATTTTGTTTCCGGAGTACTTCATTTGATCTCCTCCGCAGTTCTAGGGTTTGGGGGCATCTAT

CATGCTCTGATTGGGCCCGAAACTTTGGAAGAATCCTTTCCATTCTTTGGCTATATATGGAAAGATAAAA

ATAAGATGACTACAATTCTAGGTATCCATTTAATACTATTAGGCGTCGGTGCCTTCCTCTTAGTGTTCAA

AGCACTGTATTTTGGAGGTTTATACGATACATGGGCACCTGGAGGCGGGGATGTAAGAAAGATTACAAAT

CTCACCCTAAGTCCGAACGTTATCTTTGGTTATCTACTAAAATCCCCCTTTGGTGGAGAAGGCTGGATTG

TAAGTGTAGATAATCTAGAAGATATTATTGGGGGACATGTCTGGTTGGGCTCTATTTGTATTTTTGGGGG

AATCTGGCACATATTAACAAAACCATTTGCTTGGGCTCGGCGTGCTTTCGTATGGTCCGGAGAAGCTTAT

TCGTCCTACAGTTTAGGAGCTCTTGCCATCTTCGGTTTCACCGCTTGTTGCTTCGTCTGGTTCAACAACA

CAGCATATCCTAGTGAATTTTATGGTCCCACTGGCCCAGAAGCTTCTCAGGCTCAAGCTTTTACCTTTCT

TGTCAGGGACCAACGTCTCGGTGCCAACATAGGTTCTGCTCAGGGACCTACCGGGTTGGGTAAATATCTG

ATGCGTTCCCCCACGGGAGAAATCATATTTGGAGGCGAAACCATGCGTTTCTGGGACCTTCGTGCTCCTT

GGTTGGAACCCTTAAGAGGTCCTAATGGTTTGGATCTTAGTAAGCTAAAGAGAGATATACAACCGTGGCA

GGAGCGACGATCCGCAGAGTATATGACTCATGCGCCCTTGGGTTCTTTAAACTCCGTGGGTGGAGTAGCT

ACCGAGATCAATGCCGTGAACTATGTCTCTCCTCGGAGTTGGTTGGCGACTTCTCATTTTGTTCTCGGAT

TCTTTTTCTTCGTGGGCCACCTATGGCATGCAGGAAGGGCTCGTGCAGCTGCAGCCGGGTTTGAAAAAGG

AATTGACCGTGATACCGAACCCGTTCTTTCTATGACACCCCTTAATTGAAAATTAAAAATTGGGTAAGAA

CCGTTGAGGTGATGATAGAAAAAGAATAAGCAAAGAATTATTTCCTTACTAGTAGGTTAGTAGCTGCTAG

ATGGATGTACGTCCCTGGATTCACCGCATCGAGGTAGATTCCTATTTATCTATCTATCTATTTAGATAGA

TAGATAGATGCCAAGCGAGTCTTAGTTAGTTCGTCGGTGCAAGTAGCTCTTAGATCTTCTTATAAACGAG

GTAGAAACTGACCTAGTAATTATTGTCTATTCTTCCGAAACAATAGTTTATGAAGAACCACGAACCAGAA

GGTAGCCACGCCTCTTTTTTTAAACGTTTAGAAATACTCCCGCGGAATACCCCATTTTGGGGTGGTAGAG

GGGGCATGCTGGTGAGAATAGGTAAACCCAAGGATCATTTTGGATCCCCCTGAGTCGCATACGGTAATGC

GCGGACTCACCCCACGACTAGGTGGATTATTCAGATTGAGACAACCTCATTTTATTTTTCCGGCGAATCA

GCCGATGGGACTAGCGTCAGTCTAAACTGTATTTAGTTGGTATTCCATTTTGTGCATACGCTACGATCCC

TCGAACCTTGAGAGATACTGATGCGGGTCCCAGCCACAGCCGAATCCCAGAATAAAACTATTTTTAGACT

GCTCACTTTAGTAGATGGAAGGTTATTTGTTACTAAGGCAAAAAAAAAAAAAGTTATCGCTGGGTACCTG

AAGGATACTAGATACTATCGGATGATTCTTTTAAGGAATAATTTTTTTTTTTTAGACCATTTATACCTCT

CATCTTTTGTCCCTGAATATTTGATACTAAGCCAATAGTAGGAGAGAGAGGGATTCGAACCCTCGATGGC

GTTTCGACACCATGCCAGTTTTCAAGACTGGAGCCATAAACCACTCGACCATCTCTCCTGCAGAGACAGA

CTCCTTACTCAATAATCAAAGGATTAATCCTCTAGTTTAGGTGAAATGGGAATCTAATCAATCTCAAGAC

ATATGCATTGTATCAAGATCTATCTCTACTGTGAAAGATATAGAGTGGGAGGAATCTCATAAGATTGATC

GTGGAGTTGCTGTGGATGATCATCCCGAATGGAGAGATTTTCACTTCCATTCAACGAATCATTGATAGAT

TCAGTGACATTAGACTCTAGAGTACCAGAAGGGCTTTGATTCCCCCTCAAATACCTGGTACAGTGAAAAT

CTCACCGGATGCGGATTGGATGGTACAAATAACCAATTCCTTATATTTATATGGAGGGAATCAGAATTAT

GATAATGACAATCGCTTTCCAATTGGCTTTATTCACATTAATTGCTACCTCATTCCTACTAGTTGTTGGC

GTCCCTGTAGCGTTCGCTTCCCCCGGCGGTTGGTCCAGCAATAAAAATATTGTCTTTTCAGGGGCTTCAT

TATGGATCGGATTAGTTTCCTCAGTAGGTATACCCAACTCCTTTATTTCTCAATAATCCGATGTTTCGGC

TCCTCTTCTCGTAATTTACTGTTACGAGTGGAGATGTAAAATCAAGAAGATCTTTCTTTGTAGAAAGAAG

CTAGGGAATAGATATTCTGTTTCGATCTGTTTCGAGGGGGTGGGTCCTCTCGCCCGTGAAAAAGCTATTT

CGGTCGGGTTCTGATTAATAAACTAGATATGTCAAATCTGTAAAATCACTACACATTGAGTATGTGATGC

GGTGTAGAATACAGTAACAGATTATGCGGATATAGTTGAATGGTAAAATATCTCCTTGCCAAGGAGATGA

CGCGGGTTCGATTCCCGCTATCCGCCCATCAAATAACGAATCTGCTATATACATAGAAGAACGCATTAAG

AATCAATCATTCAAAAATTATTGAATTCTTTTTTGTTTATCTATCCGGGGAGCGTTTCATTTCTATCCTG

AGTCTTAAAAACTCCGACCATACTCTTTTATAAAAAGGCATCCAAATGCGGATGGATCCAGTGATTTTTT

TTTTTTTACTTCTTTCAAAATACGCGCAAGTAGGTTCAACGACAGTATTAATTGATTAGATTGAATCAGC

CCCCTACCCCCCCCCCCCTAAAAGGGGGAGGGATGGAAAGATGACTTTATTGGTAATTTGGTTGAAATAT

AATGAACCGGGTGGAAAGGCCGGCCAATCCGTCCCAAATTTTTTTTATGCAATCTCAATTGTTTGAGATT

GGATGTGCTCCGGCTAAATAGTCCTTTTGAACTAAGGGCGGTCCAGGACAAGTCCCTTATGCCGTTGCCG

GATAGGGCAATATGTGGAAGAGCTCAATGAGATGGATGAGGGCGGGCTGGACAGCTCGGGCATACTGGGA

TGGCTCTCATTTAAGGTGAGGTATTGCCCGGGCCAAGAGATACCCTTCCCTTAGGGGCCAAGTGCCTTTG

CCAGGGTCTCTTTACGCGTCGTACGTGGGATATGCAGAAGACCACGGGATAGAGTCCCTTAACTACTACC

TTTTCGGGGATGTACTCGAAGACTCCCTGCGTACCAGAGGGCACAGGAACATAGCCATCAAGAGGATGAG

ATTCGGTAAAGTGGTGAAAGGCCTGTCCTTGGGCCCGGGAGGTAGGCCATTATGCCGGGAGCCCAGATCC

GATATGATGAGGCGGATGGAGGAGGAAGAGCCCTGGGAAGGGTTTAGCAAGGATCTGGACGATTGGAGGG

AGCGGAACCATCCTTTAAATGGGGATGATTATGACGACTGGCCACCAGCCGAGCCCCAGAGCCCCGAAGG

CTTCGACCAACTCGATCGTGTCGATCGACACCAACGTCTTCCCCGAGACGACGGGGTCGAAAACCAACAG

GTGACTTAGCTATGACCAACTGGCAGCGCTCTACTGTGCTGATTCTTACCTTCGCTTTCTTAACCTCAAC

AAAATATTACATCTCAAGGAGTTGCTACTAGGAATATTTTCGGTTCTATCTTAGGTATGGTAGGTCTTTA

CAAGTTCTTCCTTTGACCGGTCGTTCATTAAAGTGATCTCCATCGTCCATAAGGTCGTTACAGCTGTCCT

TTTAGACGAGAATAGCTCTATACGCCTGGCCGACAGGCAGAACTTATTGATGGATATGGCGACCGCCCTT

TGGTAGGGTGAACCTAAACTGGTAAGAAAGAGAGGGCTGGCCTTAGCTACAGGTTCGGACGCGTTATACA

ATAGCTTTAGGGGGATAAGCTACTTGCTAACGTTTCTGCTCGATAGTATACTTATTAGTAAGCGACTTAC

CATCAAGCATTCCGCATCAACGGAGTTTTCTTCTTGGATTGAGATCTGTCACAGATACTTAGGTAAAGGC

GATATAGTCAAGTGGTAAGACGGAGGATTGCAAATCCTTCATCCCCCAGTTCGAATCTGGGTGTCGCCTG

ACACAACATTATATATATATATATATATTGCTTTTTTCTTTCAGGGATTGTTTGTTGCGCTGAAACCGGA

TACAAATCGAGATGCTCTATAGTCTATTATAGCCTATCACGCTAAATGTATATCGATGCGTCACGCATAA

GCAATCCCAATAACAGTATATCACCGGTTTATAAATTAAAGGTCTGAATCATCAAGATTTCGCAATAAGG

ATTTGGTAACATAAAAAAAAGGTCTATACATCCTCATTATCTTTTGTTATTGGGGTATCCTATTGAATAG

GAGTGTAATTCTCACGCACGGCGTGTTTCCAAGCCTGGACTCGTTCGTATTTGGACTCGCAAATATTCAA

TAATTAGGAAATTTCAAGAGAGTTGAAAGGGATAGGAATTATAATTACGGATCTAGTTAGTATAGCTTGG

GCTGCCCCGACGGTGATTTCTACATTCTCCCTCTCACTTGCAGTTTGGGGAAGAAGTGGGTTATAACAAA

TGACCATTTCTTTCGTAGTCTGATTCGGGGAATGCAGATCGTTGTAACGATACCAACGATTTGCGTTCTC

CCGTTCTCCCTACGCCGGAATTTGTTTCTCAGTAGGAAACATAATATAAGCTACTCTCCTACCCTGTGAA

AGAATTTATCTTTCTCCAATCTATGTAAAATTGTTCTCTCTCGGGAGGATTCATCTACTGGAGTTTTTCG

CTCCAAATTATCCGCTGGTTAATTTTGCTAAATGTATCAATATGCTCGTTTTACAAATCTACATTATTAA

TAATGATATATGTTGCAGTTCCATCTGGAAGTATTTCAGCCGATGGTAGGATGGGATCCAGACGACAACC

CTGAAAGATCATAATGCCTCGACATAAGTAAAAAAAGAATTATAATATTGGGCTAGGCTGAGACTTTTTA

GGTTAGTCGGTTAGGCACCCCCCTAAAAACCATATGTGATTCTTTCGTCTCGTTATGACTTAAGCGATGC

GGAAAATTCTCAAAATATTATTTTTTTGTTTTTTTTTTTTCCAGAGAGAATAAGCTATAACCAAATAGAT

GTCACAAAAAGATAATGTCTTGGGATACCTATTCTTATTCTTCCCATTAGTTTTGAAGACTGAAGAAACA

AATTGAATCAATTTAGTCCTGGATTCATTTTTTCTATTTCCAAATCTAATCTACTATTTCTGCTACTGCT

TCAAGTTTTGGATGTTTTGCATAAAAATATGTTAGATTGAACAATCTTTTTGGCAAGTACAATTGAGATT

ACACCTCTAGGATACCTGAGGTTCCTTTTTTATAGGGGCGTACAAAAATATACCTATCACTACTAATCCA

ATTTCATGCGAATCGTGAGCAGAAGAATGATAAATATAGCTTTACTGTATAAATCAACAATCTGATCTAT

CAATATTTGTGCATTCTATCTATTTATCTATTCACAGATAATAGGTTGAGACATAGATAAATAGATAGAT

AAAAATAGAGATTCCGATTGAAAGAAAAGGGACTGAAGAAGCCTAACCAGGAAGGGGCGTAGGGACCAGT

AATTTATTACTAACAACCATATTGCGCATTACTGTCTCGTCCGGAATACTAGCCTATATCTCACTCTTTA

TTCTGCAACAAAGATTTACTCTATGTTTCCCTACTTGCTTCTGTACACTGAGGATTAACAGATTGATCCT

CGAATTAATTATTTTGAGCGGCCGTTTGAATGTAAAGAATGAGTGGAAAAGCTGTGGGGATTAGGATGAA

AAGTGCAGTGGCTACAAACGCAACAATATTGACTTCCGTATTAATAGTTCAAATCAATTGAGGAATAGCT

TGAGTGGTTCCATTGGGAAAAAACTCTCGGACTCTATTATGAACCATCTATTTCTAATTAGTTTAGTCGG

GTCGACCGAATTAAGTATCTCCGATTAATCAAAGATAAGGGAGTATTAAAGTTGAATTTTCGATATCGAT

TACATAGTATATCATGAAATGAAATCTCAAGAATACCTGATTCCGCTCTTCCTCGCGACAATAACCTACC

CCTCACCCTTTCTTTTTGGATAAATCAATCAGCCGCTGCAACCTCGTAAGAGGTATTAGAAATCTAATCA

AATGATTAGTCTAATTTAATAGATTAATAGACTGGAAAAGACAAAAAAAAGTTGAATCTTGTTACTTCTC

TATTTTTTTTTTTTCGAGAGATAAATTAGATTGACGATTCGTGGGGAATACCCCTATAATTTTAGGGGGT

AATCGGGCCCCCATCGTCTAGAGGCCTAGGACATCTCTCTTTCAAGGAGGGGACGGGGATTCGAATTCCC

CTGGGGGTATTCATTTTGCAAGAACCTCGCGATCGTACTAGAAATAATATTCTTATTCTCTTATCGGCTT

GTACTCCAAAATCAAAATAGGGGTCCGATTCGAATAATCGGGATGCAAACGTGAATCAACCGGCAACCCT

ACTGTCGAAACCGAAATGTTCCATAATATGTGGGTCGATGCTCGAGTGGTTAATGGGGACGGACTGTAAA

TCCGCTGGCGGCGCCTACGCTGGTTCGAATCCAGCTCGACCCAAGTCTGAGATCATAGACTCATTTGTGA

CATCGTTTATCTCATTGATATCGGAATCGAAACCCTAAATCGTTTCACTAGAATTTATCGGGATTGACGG

GTCTCGAACCCGCAACTTCCGCCTTGACAGGGCGGTGCTCTAACCAATTGAACTACAATCCCAAGAATTA

ATTAGAGTTTATATAGCGGCTGCTTCAAAGTCAACGATCTAGTTATGGGTAAAAAAAAAATTTGATGAGG

ATAAAATAAATATATCAAAAGTTCAAACCGAGCTTTTAGATATCTATCTACATTGGATAAATGACAGATA

CAATGGGAGGCGAGACTATCTCAATCCCTATGAAATCGATGGGAATCCTCGCGCGCCATAACCACCCAGC

GCTTGTTTCTATTACGTACGAGGATTCGATCAAGATGAGTCGAAGAATATCTGCTTAACAAATCAATAAG

TTAACCTTTAATAGGCAATTGGATTGACTAAACAAAATACTCTCATCAAACTTTTTGTTTCTATTAGTTA

ATATACCGCGGCTATTCTTCCATTTTTCGAGAGTTAACCCTTACCATGTGCGCCGGCCGCCCCATCCGCA

ATATCCCCCCCCGCGTCTGCTCCTACATCCTCTCTTGTACTCGAATTTTCAATATACCTTCTATAGGAAA

TCTTTTATAACTCTAGTAATCTATTACGAAGACTTGTGTGGAAAGGAAACCAGGTTGATCTATTTATTTG

AAAATACTTTAGCATAACTTGGAACTATTTCCCCAACCCCTAATTCTCTTAGTAAGTCGCTTCCCGTAGA

TTCAATTTCAATTGGTGAATCATTAATGGCGCCAAGGTTGCTACTGAGGAAAAGAGAAAACCCTCCATCT

ATTCTTTCACGCTTTCCTAGCAATCGAAGTTATTGATATAATATACTTGCGGGGTTTCTCTTTGTTTGCT

GCGAGTCATTACATATTTTTGAATCGTCAAAAAACCTTTGGATACGTGAGTGGTCTTAATTCGTCATAGA

ATTATCTTCCTGAATATGTAGGTTCGTAGCACTTGGGTTGCACAGACCCTTCCCTTACAGCCTACTTTCT

TTCTACTAGGATCTAGCACCTGGTGAAAAAGTTCCTGTAAAAGATATTTATAACTCCTCCCCACCTCCTT

TCTTATTCTCTTCTATTTTAACCTCTTTGTTTCTTCTTCCCCTTGTATTTTTATTTTGAATAGAAATACG

AAATTAGTATTTCTGTGAAGATGTGGATAATGTAATAGGGGGGCGGGGGGGGGCTAGAAATAAAGGAAAG

GGAATCTAATTGATATAGTTTTGCTTGAGAATGAATCTCGGTGTAATATTAGGAGGAGATAGAAAGACGC

CTGTACTGCCAGAACTTGCACGAATTCAATTCGAAGGGTTTAATCGTTTCGTTAACGAAAGATTGCTTGA

AGAACTTAAGAATTTTCCGAAAATTGAAGATACAGATAAGGAAGTTGAATCCTGATCTATTAGTGAACAG

TATCAATTGACAGAACCTTCAGTCGAAGAGAGAGATGCTGCGTATCAATGTGTTACATATTCATCTGATC

CATATGTACCAGCTTAATTGACTCGGAACAGAGACAGAATAGTGCAAGAAGAGGCTGTACGCCTCGGAGC

TATTCCTTGGATGAATTCTCAAGGAACGTTCATTATTAATGGAATTGCTAGAGTTTTGATTAATCAAATA

CTGAGAAGTCCTGGTATTTATTACAATCGCGAATCGGATCAAAAAGGAGTTTCTGCATATACTAGCACTG

TAATTTCGGATCGGGGAGGAAGATTTAAATCAGAGATGGATAAGAGAGACAGGATATGGGTTCGTATTAG

CAAGAAACGAAAAGTATCCATTCTGATCTTATTAATAGCTATGGGATTAAGCAGAAAAGATATTTTACAG

AATGTCCGTTACCCTAAGATTTTTTCAAATATATTGAAGAAACAAAAGTGGGATATTGAATCACCAGAGG

ATGCTATAGTGGAACTTTACAAACAGCTATACTCTGCTACAGACGTAGATATAGTATTTTCAGAATCTAT

AGTCAAGGAATTACAAAAGAGATTTTTCCAACATAGGTGTGAGTTGGGACGGATTGGTCGACGAAACTCA

AACATCAAACTAGCTCTGGATGTACCCGAAACGGAACATTTTTTATTACCCCAAGACGTATTAGCAGCCG

CGGATCATTCAATCGAAATAAGTTATGGGATGGGTAACCTTGATGACATAGATCATTTAAAAAATCGACG

TGTTCGATCTGTGGCGGATCTGTTACAGGAACAATTGAAATTGGCCTTAAACCGTTTGGAGAATCCGATC

CGATAAAATCTTCGTAGAGCCGTTAGGCGTAAACGTCCATTAACTCCCAGAGTATTAGTAACGTCTGTCC

CGGTAATAACAACTTCCAAAGAGTTTTTTGGTTCACACCCCTTATCACAATTTTTAGATTAAACCAACCC

ACTATCAGAAATGGTTCATAAACGAAGATTAAGTTCTTTAGGTCCTGGGGGGTTGACACGGCGAACCGCC

AGTTTTTAAGCTCGAGATATTCATTTTAGTCATTATGGGCGTATCTGCCCGATCGAAACATCTGAAGGCA

TGAATGCTGGCCTCATCTCATCATTAGCTATTCAGGCAAAAGTTAGCAATTCTGGATCCTTGCAGAGCCC

TTATCTTAAAATGTCCGAATCGTCTGAGGAAGAACAATTAGTCGATTTATCCCCCGCTGAGGATGATTAT

TATCGAGTAGCAACTGAAAACTTATTAATATCGGAATGGAGGACTAGAGAAAGAGAGGTTATACCGGTTC

GGTATCGACAAGAGTTTTTAAGCGTTCTATGGGAGCAAGTCGATTTCCGAAGCATTCATCCTCTACAATA

TTTTTCTATCGGAGCTTCTCTCATTCCATTCATTGAGCATAATGATGCAAATCGCGCCTTGATGGGCTCC

ACTATGCAACGTCAAGCGGTTCCACTCTTTAAGCCTGAAAGATGCATTGTAGGGACTGGGTTAGAAGGTT

AAGTAGCCTCGGATTCGGGAGGTGTAGCTGTATCTGAACGAGAAGGATGAATCCAATATATTGATGGTAA

TAAAATTACACTATCTACGACCGATGAAGAGAGCGGTGAAAAAAGTTTAAACACTACAGATACCAGATTA

AGAATTTATGAACGTTCTAATAACAATACCTGTATACACCAAAAGTCTACAGTTATGCCAGGAGAACTAT

TGAAAGGCGGAGAAGTTGTAGCGGATGGAGCAGCAACCGTTGGGGGAGAATTAGCTTTAGGTAGAAATAT

CTTAGTAGCCTATATGCCGTGGGAGGGATACAATTCTGAAGATGCAGTATTGATTAGTGAACGTTCGATA

TACGAAGATATTTCTACATCTTTTCACATTGAGAGACACGAAGTTGAAGTTTGTGCAACAAATCAGGGTC

CTGAAAGGGTTACTAAGGAAATACCTCAATTGGATAGTTATGCACTTCGACATTTGGACAATAATGGGCT

TGTAGAATCGGGATCTTGGGTAGAAGCGGGGGATGTTTCGGTGGGTAAACTGACACCCCAGGAGGGGGCG

GATTCATTACGTGCTCCAGAAGGAAGATTATCACAAGCCATTTCTGGTATCCAATTAGTTAACGCAAGAG

AGAGTTGTCTGAAAGTCCCGATTGGTAGAAGAGGTCGAGTCATTGACGTTAGGTGGGTTTATCCCGAAGA

CGATACTATGAATGATTCAGAGGTTATTCATATATATATCTTATAAAAACGTAAGATACAAGTAGGTGAT

AAGATAGCCGGCAGGCATGGAAATAAAGGTATTGTGTCAAAAATCTTACCCAGACAGGATATGCCTTATT

TACAAGATGGTACACCAGTCGATATGATATTAAGTCCCTTAGGAGTACCTTCATGAATGAATGTAGGATA

GATTTTCGAGTGTTTGCTCGGGCTAGCTGGGGAGTTTTTGAAAACGCATTACCGGATAGTACCTTTCGAT

GAAAGATATGAGCGGGAAGCTTCTAGAAAACTAGTATTTTCAGAGCTTTGTGGGGCGAGTACAGGAACTC

GCAATCCATGGTTATTCGAGCCCGAACATCCCGGAAAGAGTCGATTGATCGACGGACGAACAGGTGATCC

TTTCGAACAACCAATTACGATCGGAAAGGCCTATATAATGAAATTGATTCATCAGGTTGATGATAAAATT

CATGCACGATCCAGCGGGCCCTATGCGCTTGTTACGCAACAACCTCTCAAGGGAAGATCTAGACGGGGGG

GACAACGAGTTGGAGAAATGGAAGTTTGGGCTTCGGAGGGTCTTGGCGTATCTTACACATTGCAAGAGAT

GCTTACAATTAAATCAGATCATATTCAAGCTCGTTACAAAGTACCTAGTGCTATTACGACCGGAAAACCC

ATCCATAAGCCAAATACGGTTCCAGAATCTTTCCGATTGCTAGTTCGAGAGTTACGATGCATGGGTCTGA

ATCTGGAGCACAATTTTATATTTGAAGAAGATTCGGGGAGGGGGAGTGAAGATATTTGATATTTAATCGA

AACTTTTTTTTTTTACAAAAAACCAATTGAAAACTTTTATCTTACGATTCATCGAACTAATTATCAACAA

CTTCGGATTGGACTGGCTTCCCCCGACCAGATTCGCAGTTGGGCTGAAAGAGAGTTACCTAATGGAGACA

TCGTTGGGCAAGTTGATTAACCTTATACGTTGCATTACAAGACTCATAAACCAGAGAGAGATGGTTCATT

TTGTGAAAGAATATTTGGGCCCATAAAGAGTGGAGTTTGTGCTCGCGGAAACTACCGATCTGTCGATAAT

GAAGAGGAATATTCAAATTCTCGTAAGCATTGTGGAGTCGAGTTTACTGACTCTCGGGTTCGAAGATACC

GAATGGGATATATTAAACTAGCATGTCCAGTAACCCACGTATGGTTCTCAAAACGAATCCCCAGTTACAT

TGCAAATCTCCTTGCTAAACCTCTCAAAGAACTAGAAAGCCCAGTATATTGCGATGCGTGACTTGATTGT

ATGTTTCGATTATCACAGATTAATTACAATCTGTCATCCTATACGACGATGGGATGCCTCCAATTCCGAC

ATATTTCTCACGAGCGAGGAATATCGCGTAACTCGGGATAAAAAGTACTATGTACAGAGTACAGGCTGAG

GGCTCTCTTCCAGGGTTAGTTTTTATTGATTAATCCATCGATTAGGCTTCGTAATAAAGGTTTTTATCTC

ACATTCATGATTTGACAAGAAAGAATCCAAGTGTTTTCGACACGATCTTTCACTCAAACTTCTTCTTCTT

TTTTCAAGAAGAGTTTATTTTCTGATAGAAATATGGTTATGAAAACTTAATCATCGCAAAGGCTTTTCAA

ATCGATTGATAACCATCGGAGTGGAGTGGAAACCCAAAGAGGAGAAACGGTCGTATTAGGAACAAGAAAA

ATCTCCCCAACCTCTGACCAAAACGAGAGGGAATAAGTAAAAAAAAAAAAATTAGTATTTCTGTGAAGAT

GTGGATAATGTAATAGGGAGGGGGGGGGTAGAGCTGAGACTACTCAAGAAAGGTAAGTTCGAACTTGAGT

AATGAACAGCTATTTCATTCTCTATAGATGGGGTGGGATTATCGTGCCCCAAAAACGTCATATCGTACTG

TCGGAACTTCACACTTAGATATAGTTATTTGAGCCGGATGAGAGGAAACACTCGTGTCCGATTCTCTGGG

GGGGGGTATTCATTCGACCTATCCCAATCTTTTTCCTGCTAGGCCTATGGCTGAGAGACCTACTCTATTA

AGATTGCGGGGTTTGTTCAATTATGAGGATCGATCCTGGAAAAATATTCTTCCCATCTTTTTTCCCACCC

GGAACTTTGAAAATCTTCAAGAAAACGAAATAGCTACTGGAGGGGATGCCATTAAAAAATGATTAGCTAG

CTTAGATCTGCAGAGTGTTATGGATCGTGCGTATTTGGAGTGGCAGGCACTGACGAAGCAAGGATCTATC

GGGAATGAATGGGAAGACCGAACAATTCAAAGGAGGAAAGATCTTTTGGTCAGACGGATGAAATTAGCCA

AGGATTTTCTCCAAACAAATCTAAAACCAGAATGGATGGTTCTGAATCTTTTACCAGTCCTTCCACCCGA

ATTGAGGCCAATAGTTGAACTATATGAAGGCGAATTAATTACTTCTGATCTTAATGAGCTTTATAGAAAG

ATAATTCATCGAAATAATACTCTTATCGAATTTCTATCGGGAAGTGAATTCACACCCGAAGGACTGATTG

TCTGCCAGAAGAGACTCATTCAAGAAGCCGTGGATGCCCCTATTGATAATGGTATACGTGGACAACCAAT

GAAGGATATTAATAACAGGCCTTACAAATCTTTCTCAGAGGTTATTGAGGGCAAAGAGGGACGATTTCGT

GAGAATTTGCTCGGAAAGCGGGTCGATTATTTAGGTCGTTCCGTTATTGTAGTAGGTCCGTCTCTTCCAT

TACATCAATGTGGATTACCCCGAGAATTGTCGATCGAGCTTTCCCAAGCCTTTGTAATTCGTAACTTGAT

TGGTTGACACCTTGCTCGTAATCTACGAGCTGCTAAGAATATGATTAGAAAAAAAGACCCCATTATATGG

AAAGTTCTTCGGGAAGTTATGCAAGGTCATCCCGTACCGCTGAATCGAGCACCTACATTGCACAGATTGG

GTATACAAGCATTTCAACCCATTTTAATAGAAGGACGCGCCATTCGTTTGCATCCATTGGTTTGTGGGGG

GTCTAACGCAGATCTTGACGGAGATCAGATGGCTGTCCATGTACCTTTATCTCTAGAAGCTCAGATTGAA

GCTCGTTTTTCAATGTTTTCGCACACAAATCTATTGTCCCCTGCTACGGGAGATCCCGTATCTGTACCGA

GTCAAGACATGCTTCTCGGTCTTTATATACTAACAATTGATAATAGGCAAGGAATTTATGGAAATAGGCA

TTCTACTTTTATAGGCTCCTCTCCCAATATACCCTATTTTACTAGTTACTACGATATACTTAGGGCCAAG

GAATTAAAACAAATTGATTTCTATAGTTCTTTGTGGCTTCGGTGGGGGATTGATTTGCAAACGATCAGTT

CGAGAATTCGTGAATTGCCTATTGAATCTCAATATGAACCCTCAGGAACATCTTTCCACTCTTACGATAA

TTACCAAATCAGAAAGTGTAGGGAGGGCCATATCCTTGGTATGTATATACTTACAACAGCTGGGCGTATC

TTGTTCAATCAGCAATTAAAGGAAGCGATGCAAGGTATATCAAAAGCTTCTTTTCCGTGTGGAACTTCGG

CCATACCAAGTACAATGATACAAGAAAATAATTTTTAGATCTGATTGGAGTAATGAAGAATGAGAAAGCT

TTTTTTTATACATTTAATTTAATAACTCGAACCCCAATCTATTGGTTAATAATTAGTACGGGGTAAAAGA

ATAAGAAAAAGTTGAGGTTTCTAAAATGGCGGATCAAGCTGAATCACCTTTCTATAATAAGATGATGGAT

AAGGCTGCGATGAGACAACCTATCAGCAAGTTAGTCGTTTGTTTCGGAATCGCATCTACAACAAACATTC

TAGATCAAGTTAAGGTTTTGGGTTTTCAACAAGCTACAAAAGCATCTGTCCCATCAGGCATCGACGATCT

TTCAACAGTACCCTCCAAAGGATGGCTTGTATAAGATGCGGAGAGATTAGGTTACGTCCCAGAGCAGTAT

CATCGTTACGGGAGTTTGCATGCCGTAGAAAAGTTACGTCAATCGATTGAAGCCTGGTATGCTACAAGTG

AATGCTCGAAACGAGAAATGAATCCAAGTTTCAAGATGATCGATCCTCTAAATCCAGTTCATATGATGTC

TTTCTCAGGGGCCCGGGGAAGTGTCTCTCAAGTTCACCAGTTGCTTGGTATGAGGGGATTGATGTCAGAT

CCGCGGGGGCAGGTAATTGATCTACCCATCCGAAGAAACCTGCGCGAAGGCTTATCTTTGACAGAATATA

TTATTCCTTGTTATGGTGCTCGCAAGGGGGTTGTGGATACCGCGGTACGAACATCAGATGCTGGATATCC

GACACGTAGGCTCGTTGAAGTAGTTCAACATATTGTTGTACGCAAAAGGGATTGTGAAACTACCAAAAGC

ATCGCTTTGAATCTTATTGAGGAAAGAAGAGGATCTATCTGAACGATATCGTATCAAAGACTGATTGGAC

GTGTGTTGGCAGATAACATCTATTGGGATGTGAGATGTATTGCTACACGTAATCAAGATATTGGCGATGA

ACTGGCTAGTAACCTCGCAGCATCGGCGCAACCGATACATATAAGATCCCCCTTGACATGCAAAAGCATT

TTCTGGATTCGTCAGTTGCGTTATGGTTGGAGTCTCGCCCATCACAATTTAGTAGAATTAGGAGAAGCTG

TCGGTATCATTGCGGGTCAATCAATTGGAGAACCAGGAACTCAATCAACATTAAGAACTTTTCATACAGG

TGGAGTATCTACGGGCGATATCGCAGAATATGTACGAATTCCGTTCAATGGACTCATTAATCCCGATGAA

AGGTCGGTGTATCCCACACGTACGCGACATGGGCATCCCGCTTGGATGTGTCGAAATGAATTACCCATCC

TTATTAAGAGTCATAATAATATACACAATTTCACCATTCCAGCACAAAGTTTACTTATGATTCGGAACGA

TCAGTATGTCGAATCCCAACAAATCATTGCGGAAGTATGAGCCAAAGAATTTCCTCTTAAGGAGCGTATT

CAAAAATCTATCTATCCAAATATAGAAGGGGAGACCCACTGGAGTAGATTTGTGTGGCATCTATCTGATT

GTATAGATAATCCCATTCGTGTCGTACGCGAGACGGGTCATATTTGGATTCTTTCGGGAGTTTTTAATGA

TTCCGATAAGAACTATTTGTTTCATGAGGATCAAGATAGAATCAGTGTTAAACCTAACTCTAGCGAGAAT

AGACAGGAGTCTCATGAAAGGTTTGGCGAGAATAGAGATGCTATTGATTATGAGGGTTTTCAAAAAGGGA

TCCAAGGGTTTGGAATCAATCCAAAATGTTTTTCAAATTGGCTGAAACCTCCAGTATCTACTTCGATTCT

TTCTAATCTCATGGTGGAGCGGGGTGAAGAAAAAGAAGCAATTTCTTCGTTACTGAAACGACAGGGAAAA

GGGTCTAATGAATCATATTTTACAAATATTAATGTTAAGTTAAATAAGATCTTGGATCGGGATGATATTC

TTGCTATCTATGAAAACCCTGAGCATCAAACGGGTGTTTCGGGGGTTATAAAATATGGTACTATAGGGGT

TGAACCCGTTGTTAAAAAAGAATTCGTTTCTGATAGTGGGACAGTAAAAACTCTGGGCTCACGGTACAGA

GTAATCAAAGGAGGCAACTCTTTTCTAATCCCCGAAGAGGTTTATACTACTCACGAACCCTTCTCATCCA

TTTTGGTAACAAATAATACTATTATTGAGGAAGGTACGCAAATAACCCCTAATATTATTAGTAAAGTCGG

CGGACTGATCCAAATCAAAAAGACACGAAGCAGTATTGAGATAAGAATCCTGCCTGGATATACTCACAAT

CTGGAAAGGGTAACTAGTATACCCAAGCAGGGTGATACTCTAATTGCACCAGGTAATATGATTTTTAATG

ACTTCAAATCCGAGAATTGGGTTTACCTCCAATCGGTTACACTCTACAGGAAAAGAAAGACCTCCGTCCC

GGTAAGACCAGTTGTAGAGTACAATATATCTAACAATTCTTTGGTGCAAGTAACCTCCCATCCCGAAAAA

CCAAAGACGCAAAAATGCGCAAAAATTGAATCCTTTACATATATTTCTTATAAAAATGGTGAAAAGATTG

AAATAAGCAACCATACAACTATTCAATTAGTTAGAACTTGTTTAATGGTTGATTGGCCAGAATATTTCTA

CCAGCTCTTCTCTATAAGAAATGCTTATTTGTCTCTTATTAGTGTAAGAATAAATAATATTCTCCGTACC

TTTCTTCAAGTTAACTCAATAGTTTTTTCCAGTGCACCCCCCGCACGAAGTGTCAGGGTCAATCAGGTTT

CTCAACCACCGGTGTCTGTCGACGAGCCATCCCCCGATCAAGTTGATCTATCTAACAGTAGGAACAAATT

AGTTGTCAAGTATCAAAGTACTGTTCATTCGGTGTCGGAACGAGGTGCATCCTTCTTAATTTTGTCGCCG

TTCAACCTCTTTCGTAATATTTTGTCCACCGATTCGAGCAATAATAAGCACGAAAAATCAATTGTGGGAT

ACTCCAACGATTCTAAATCAGGTACAAATATTTATGCTCGGGATGAAAGAAGTCTAAAAGATATACTATC

GAATTCTAAGTATGGGTCTCTTCCGAAGAACTATCTAAAAAAAGGGTTGGCCAAATATAGAAGATCAAAT

CTTATTCCTCGTCGAAGGGAAAACCAAGAGTTAGGTTTATTAGGGACTTCATGGGGTATTTCCAACAATT

TGGTGCCCCATCCCACGTTGAGCGGTGAAGCCTCTTCCTTTGAAAATTACTTTGTTGATGATTCGACAGA

TACATCGGGACGTAGAAATTGGTATCCGATCGATGAAAATGAATTAATATTGAAATATCCTACGAATCTT

TTTCTAGATAAATGTTTATTGGCCAAGCAGATCTATTTATCACCAGATTCCTCTAATCGAGTAATCTTGT

TAATTAATCTCGGACTATCAATCAGTGAAAATCGATGCTTCTGCAGGAATAATGTTTGTCTTCAGTCCGG

TCAGGTCGTAGCTATTCACCACAAATATTTATTAACTAGAACAGCTAAGCCTCTTTTAGCGACCCGGGGA

GCAATTCTTCAGAAGAATTCCGGAGATATCATAGGAGAGGGAGATACATTAATAACATTACCACATGATA

GATTGAGGTCTGGGGACACTATTCAGGGTCTTCCAAAGGTTGAGCAGCTGCTGGAGTCTCGCTCCATTGC

TTCTATTCCGGCACGAATCGAAGATCTTTTTGGAAGATGGAATAGGGGTATTACAAGATTAATTGGAAAC

CTTTGGAGTCACTTTCTAAGTGCTGGAACAAGTATGGAACATTGTCAATTGGTTTCGATTGATCAAATTT

GAAAGGTTTATGGATCTTAAGGAGTACAAATATCGGATAAACATCTAGAAATTATCATTTGGCAACTGAC

CTCAAGAGTCGTAGCATCGGAAGATGGAATAGCTAATGTTTTTTCACCCGGGGAGCTTATTGAACCGTCA

CAAGCATAACGGATGAATCGCATATTAAAGAGATCGATTTTCTATGAGCCTATTGTACTGGGAATGACGA

AAGCATCTCTCAATACTACTAGTTTTTTATCAGAGGCGAGTCCCCAAGAAACTACTCGAGTACCGGCTAA

AGCTGCTCTTCGGGGTCGAATCGATCGGTTAAAGGGATTAAAGGAGAATGTTATTCCTGGTGACACTGTC

CCCATTGGAACGGGTAGTCAAGAGATTATTAGTCAACTAAAAGTGAAGAAACAAAAAGAATTTCATTCAA

CTATAAGTAGCAGTAATAATCCTAAATGGGGAACAGAAAATAACCTCTCTGGTTATCAGGGGGAACCAAG

TCTCCATCATAAATTAGTTATTCGTAAAGGATTAAACCGATCCTTCTCTCGACTTAATAGCAACAAATGC

TAGAATAGTTACTTAATATTAAAATTTATCGTATGTCTCAATCAACAACATTGATCAGTGGATTGTAATA

ATTTATCAAATCCAGTTAAAATGGAATGAATTCACAGTTTCTTATACTTGAGGGGAAGATGCAACAGAAA

AATCGGAATATTGACTTGGAAGGAATGATGGGGGCGGGAGTTCATTTTGGGCATCAGACCCAGAAATGGA

ATCCTAGGATGTCACCTTATATATTTACGGAACGGAAGGGTGTTCATATTCTCGATCCAACTCAGACTGC

TCGTCTTTCATCTGAAGCTTGTGATTCAGTATTCGATGCAGCAGCGGAGGGAAAAGAATTCTTAACGGTA

GGTACAAAATATCAAGTGGCTGATCTAGTAGCATCAGCTGCAACAAGATCTCGATGTCACTACGTGAACG

AAAAATGGCTTGGCGGTACGTTAACGAATCGGTCCACTACAGAAACACGTCTTCGTAGGTTTCAGTATTT

GCGAAATGGAGAAGATACAGGAGGGTTTGACTGACTCCCGAAGAAAGAGGCAGCGATTTTGAAGAGATAA

TTACTTAGATTGAAGAAATATCTAGGTGGAATTCAATATATGTCAGATTTACCAGATATTGTGACAATTA

CTGATCAACATGAATAATCTATCGCTCTTGAGGAATGTATTATTCTAGGTATTCCCACAATTTGTGTCGT

CGATACGGATCGTGATCCAGATCTCACAGATATTCCAATTCCTGGTAATGATGATGCGCGATCTTCTATC

CGACGGATATTGGATAAATCAACATTAGCTATTCGTGAGGGTCGTTCAAACTCAAAGGTTCCGGAATCGA

CGGACGGCGGGATTGGTAATTATTCCGACGATTCGGAATAGAGTGGCAAAATATTTATATCGTAACTGGG

AATATTTATCTTGTAACTGGTAATATTGTATAATTTTATTAGAGGAGCAATTTTTAGGATATTTGTATAG

TGATAATTGTGACTATTTTATACATATTTTGTAATTTTTGAAAAAAAAAAAAGGGGGGGGTAGGGATAAT

ATGCATATTGAGCAACTGAGAATTGATGAGATTGATGATCCGTACCAAGTATCGAGCGTGGAAGTAGGTT

AACATCTTTACTGGCAAATAGGGGATCTCCAAGTTCATGCACAAGTTCTTGTAACTTCCTGGGTAGTAAT

CGCCATATTGTTGGCTTTACCCATCGTAGCTACCCGGAATCTGCAAACCATACCGACTACCAGTCAAAAT

TTCATTGAGTATGTTCTCGAATCTATTAGGGATTCAACTAGGACCCAGATGGGAGAAGAAGAGTATCGTC

CCTGGGTTCCGTTTATTGGAACTATGTTTCTATCCATTTTTGTTTCCAATTGGTCAGGTGCTTTGTTTCC

TCGGCGAATCATTCAGTTACCCCACGGGGAATTGGCTGCGCCTACGAATGATATCAATACTACTGTTGCA

TTAGCTTTGCTTACATCAGTAGCATATTTCTATGCGGGTTCACACAAGAGGGGTCTTAGCTATTTTGGTA

AGTATATCCAGCCGACTCCGGTACTACTACCCATTAATATTTTAGAAGATTCTACCAAACCCTTACCGCT

TAGTTTTCGACTGTTTGGAAACATCTTGGCTGACGAGTTGGTAGTAGCTGTTCCCGTTTCTTCAGTACCT

TCAATCGTTCCTGTACCTATGATGCTTTTAGGATTATTCACAAGCGCCATACAAGCTTTAACTTTTGCTA

CTCTAGCTGCAGCTTATACAGGGGAATCTACGGAGGGTCATCATTAGAAGAGTCAACATTGATCGCTTCA

ACAAAGTATCATATCGGAACGATGGGGCGCGGTTTATTTGTAAGACCCATTCATGGGATCAATGTAGTAG

GAAAAACCGTTTCTGTGGTATGATGATACAACAATACAAGACCCTATCCTCCCCCTTACTTTTTTTTTTT

CGGTTATTCAAAGGAGTGGGGGGGGGGTGAGGGATAGCTACCACCCGCTCCATTTGAACTATTTAAAGGG

ATGGACACAAAGGGGATAATGATTTTCACCGCTCAGTCTGAGTACTCCACGAGGAATGAACGACTGACAA

GATGTTAGGTTTTTCCGTTCCTCTTAGAACTAATGATACTAAATCCCATTCATGTTTGTGTCCTGGTACG

GCAAATAATATTGTTCAATCTTATTCACGTTGAGACTAAGATTGAACTATTTCACTAGATAACTATTCCG

GAATACGCGACTCTCTTTGATCCAATTATTACCCCACGGATAGAATAGAATATCGTAGTGATAATTGTTT

GTGAGGATAGACAAGCCATTCTACCCTACCAAAAAGACCCCCTTACTGTTTTGATTCGAACTTTGATTCG

AACGTAACGGATGAGGGTATTCTATCTCATTACTAGTTTTGATCAGATTTATGCAGAATCATTATTTCAG

TCAGTATTCACTAGAGAATTTTTGTCACGCCGAGACTAATTAACATAAATCTAATGGGACAATATTGATT

AACGTAATTAAAATAGGAGGAGACTAATACGAACCCCTTGATTCCTGCTGCTTCTGTTATTGCTGCTGGA

TTAGCCGTAGGCCTCGCTTCGATCGGGCCCGGTGTTGGGCAAGGCACTGCCGCGGGTCAGGCAGTGGAGG

GTATTGCGAGACAACCAGAGGCAGAAGGTAAAATCCGAGGTACTCTATTGTTAAGTTTAGCTTTCATGGA

AGCTTTGACAATTTATGGACTAGTTGTAGCCCTAGCGCTATCATTTGCGAATCCGTTCGTTTAATTTGTT

TTTATTACAAGACATTTGGGGCTCTTTACCACCCCCTCCCTCTCCCTAAACTCTTCTCAAATCAATAGTG

AACTGTTTGAGCCGGGGAGGGGGTTAGTATATAATTATTGTTCCACCTATTTTACTGAGTCCCTACCGCA

TATTTTTAAGTCTATTCATAACCCCCCCCCTCGATCAACTAGATATCCCATAATTTTTTAACATATTGGA

TTTATAATTTTCTCTCAGGCTAGACCAGACGTTACTTAAAAATTAGAAAACCTTTCAGGAGGAGAGGAAA

TATGAGAAGTGTAAGTGAGATCGTCGCTCCCTCAAGTTATTGGACTCTCGCCGCAAGTTTTGGTTCAAAT

ACCAATATCTTGGAGATAAATTTGATTAACCTGATTTTGGTCCTAGGTGTATTATTCTACTATGGAAAGG

GAGTGTGTGCGAGTCGTATATCCGAATAGGATAACCGGTCTCTTCCAGTTGCACTTGAACCAATAATAGG

TGCAAAACCCCGACGAATTACTTGTAAATTAATGTTATGCAAGAACCAGAGCATTCCGTGGAATCGAGAG

GAAACTTTTTATTCTCATCGACTGATTCGGGAATATCATCAATATGGTTAAAGCTCAATCGCTTAAAGTC

TTAGCAAAACTAGGGTTTTCTTTCCCCTACCGCGCAACCTAAGTCGCGGTCGGAGGTCTATTCGATATAT

AACATTCGTATCGAGACTAATTTGATTCCTATCATTCCTCAAGAGAGAGATTAGAACACCTAAAAGTCAC

TAAATCTTGTTCAATTTGCTGAATAGACAACCCATACAAGATGGATACTATCTAGAAGAAGCGGCTCTGC

CAATAGTCAAAAGATATTGTCCATGAGAGCCCTTAATCCTTTTCAAATATTAACTATTCGATCTCTTCTA

GTCGGTTCGAGATGGATCATACCAATAAGAGAGAGAGAAAGATGGCGGGCCCGTGTGTGAGGATATTGCT

GGAATCTTCCGCCCTATCGGGAAACACGGGCAGGAAAGCCGAATGGGTCGAAAGATCCATGTTCGGTTTG

GGAAGAGATAATTAATCTTTGAGAATCAAAGGTATATGATCCACTTTCATTGATCAATTTCTTAGAGAAT

CGTAAAAGAACAATTTTGAACACTATTTCAGATGCGGAGGAGCGTTATAAGGAAGCTACCGAGAAACTTA

AGAGGGCTCGGACCCGCCTGCAACAAGCGAAAGTTAAAGCAGCCGAGATCCGCATCAATCAACTTACGCA

GATGGACAGGGAACAGCGGGATCTTGTTGATGCAGCTGATGAAGATTTGAGGAGGTTAGAGGATAGTAAA

AATTATACAATTCGCTTTGAGAAACAACGAGCGATTGAACAGGTTCGACAGCAAGTCTCTCGACTTGCAT

CGGAGAGGGCTCTGGAAAGTCTGAATAGTCGTTTGGATAATGAATTGCATTTGCGCATGATTGATTATCA

CATCGGCCTACTTAGGGCCATGGAAAACGCAACCGATTAGCCTTCATTTCATTATGGAACAGGTTTCATT

TTTTCTTTTCCTTCTTTCAGTAAGATACTTTGACAAAAATGGTAATAAACATTCGACCCGATGAGATTAG

CAGTATTATTCGTAAGCAAATTGAGGGATATGTTCCAGAAGTAAAGGTTGTTAATATTGGCACTGTACCT

TAAGTTGGAGATGGAATCGCCCGTATCCATGGCCCTAACAAAGTAATGGCTGGTGAATTGGTAGAATCTG

AGGATGGTACGATAGGCATTGCTCCGAATCTAGAATCTGATAATGTTGGGGCTGTACCGACGGGTGATGG

TTTAACCATACAAGAGGGAGGTTCCGTAAGAGCGACGGGAAAGATTGCCCAAATACCAGTCAGTGACTCT

TTTGTGGGTCGTGTCGTAAACGCTTTGGCTCAACCTATTGACGGTAAGGGTCAAATCCCAGCTTCTGAGT

TTAGATCAATTGAATCTCCCGCTCCAGGGATTATTTCGAGACGTTCGGTGTACGAACCTTTACAAACAGG

TCTTATTGCTATCGACTCGATGATCCCCATAGGTCGTGGTCAACGAGAATTAATAATTGGGGATAGACAG

ACTGGTAAAACAGCAGTAGCTACAGATACAATTTTGAATCAGAAAGGTAAAAATGTTATATGTGTCTACG

TAGCTATTGGCCAAAAAGCTTCCTCCGTGGCTCAGGTGGTAAATAATTTTCAAGATCGTGGCGCTATGGA

ATACACCATTGTAGTATCGGAGACCGCAAATTCTCCAGCCACTCTGCAATATCTCGCTCCCTATACAGGA

GCAGCTCTAGCTGAATACTTCATGTATCGCAAACAGCATACCTTGATTATTCATGATGATCCTTCTAAAC

AAGCCCAGGCTTATCGACAAATGTCTCTGTTACTTAGAAGACCACCTGGGCGAGAAGCATATCCGGGAGA

TGTTTTTCATTCACATTCTCGTCTTTTGGAAAGAGCGGCTAAATCAAGTCTTCAATTAGGTGAAGGTAGT

ATGACGGCTCTACCCATTGTCGAGACTCAGGCGGGAGATGTCTCAGCCTATATTCCCACCAATGTTATTT

CTATAACTGATGGATAAATATTTTTATCAGCAGATCTATTTAACGCTGGCATTCGACCGGCAATCAATGT

GGGGATTTCGGTATCTAGAGTAGGTTCTGCAGCTCAAATCAAAGCTATGAAACAAGTGGCCGGTAAATTG

AAATTGGAATTGGCCCAATTTGCAGAATTAGAGGCTTTCGCGCAATTTGCCTCTGATCTCGATAAGGCTA

CCCAGAATCAGTTAGCCAGGGGTCAGCGGTTGCGTGAGTTGCTTAAACAATCTCAATCAGCCCCATTGTC

AGTGGAAGAACAAGTAGCTACTATTTATACTGGAGTTAACGGGTATTTGGATCTACTAGACGTTGAGCAA

GTTAAACGATTCTTGGTTCAGTTGCGTGAGTATGTAACAACCAATAAACCTCAATTTGGCGAAATTATTC

GTTCTACCAAGATGTTTACGGAACAGGCAGAAATACTTTTAAAGGAAGCAATTAAAGAGTCAACAGAACT

CTTTTTACTGCAAGAGAAGTAATTAATGTGTTTCTGTTCTATGTATAGGGGAAGGGTTACTTTCGCGTTT

CAGTCACTTTTCTAATATATGCATAGTTTTATAAAACACGGAATTACGCCCAATAGGAATTGAACCTATA

CTTAAGGTTTAGAAGACCTCTGTCCTATCCATTAGACGATGGACGTTCGTTTTTCTCTATAGTTGAGAGT

TGATACGCTCGGGCAGACGCTATATTGTGAACAAACAATAATTTTAGTTTGTTCACGATGTAGCTGATAG

ATTAAATAGACAAGGTTCGGGGTGGTCCGACCAATATTATTAGCGGGTAGCGGGAATCGAACCCGCATCA

GTAGCTTGGAAGGCTAAAGGTTATAGTCGATGTCACTGGATGGTTATGGCATCTCTAATTCAGAACCGAA

CGTGAAAGTCTCTATTCATTCGGCTCCTTTATGGAAGTAGGGGGGGGGGGGGATATAAAATTGGAATGGA

TGTCTATTTCCAGCTAAAAGGGATCGCTCCTCTATCTCTTTTGTATGAGAAGGAATACGAGGTAGCAAAA

GCTTCTTACGAAGCTTAATCTTTCCCACACACTTACTCTTTTCTCTAATTCTTTATTTCTTGAATGTTAC

CGCGAGAAAGAAGCATCCATAACATCTATGTCAGTCTCGTCTGTATCTTGCATAATAAGAACATACTTCC

TAGATGATCCCGTTGAGAAGAAAACGATTTTTACCAATTTCACAATTGATTAATCGATAGAGCATGGTAA

ATATTTTTTTCTTCTAGTTACTTCGTTCTTTATTTCTACTGGCAAGAATCTTTAGGAAAATATTTTTCAC

CGAGTCGTAGAAGCAATTGCTTGAGTGAGAAAATGCTTGATAATCCTGATAAACCAGGATGAATCGTTCT

GTAACTGTCGATCTCGGATTATTCTCCAAGGTTCAGTGACGATGAAACAAATATTTTAGGTATCTATCCA

TAGATTTTGTTTTTTATCCTTCTTAAATAATTGTTTTGGGGCTCCCGTATATCAAAACAATTCTGCTTCG

TTACTAATTAATTTGACTTTGCAAAGCAAAGTCTAGGAGTAACTAGAATTACGTTTTTCATACCAACAAT

TATTAGAGATAAGTCTATGTACTTTTATAGAAATAAAGCTTTTTGATTTGATTTAGTCGAAAATCGGTTT

GATAGATCCCTTGACTAGTCAGCTCAAAATAAGACGAATCGCACTTTTACCACTAAACCATACCCGCCAC

TATATAATAGTATTACATAATCGGGTTCTCTGTCTAATCTAATGGTGGGATATTCCAGAGCTCCCTGACG

TAGTGGGGGAGCTCGCCCCCCCCCCCGTAAAATATATGTAACTTAGTCTCTAGCGGGGAGTTGTTCCGCC

TATGGGAATGAAGTTACAGATTACCCTTCCGGGCTGCCGATAAAGCGATTACTAGTGGTCCCGATGCAAC

TATTAGCGCCAGAACAGCAAGTTGTGCAATTACCTCTAGATTCATTATCTCTCCTTTTATCATTTTCAAT

AATATTTCAGTGTCAAAACAGTTTCTTTGTTCCCTTTCTTTATTGGAATGAAACGCTTCAAGTAGATCTG

AATGGGTAGTTTCGTGTGGCCATAATGGGCTAAGACTGATACAATGAATCAAGGCATAGTGATTTATGTA

AATAAGAGAATTTCGTACGCTAATTATTGTTTATTTATATATACAATAAGAAAGGGGAGATAAAAGAAGT

AATGGAATCAATTTCGGACATTCAACTTCTTTTGGCACTTATTTGTGCTTCTGCAACAAGCATCTTAGTT

GCGAGATTGGCTATTGCACTGTACCGTTAATCGGTTCAATCTAATATGGAGAAGCAGTCTGGCTAATTCT

GGCTAGGCTAAAAAAAAAATATATATATATATATTGAGTCTGTCTCGGGAGGATTAATTTATACCTAAGA

GATTGATTCAGGATTCAATTCTCTTTATTCTATCTCCTTCTTCTCTTTTAAGGAGGGGGGGGGGGGTTAA

AAAAAAGTCTATTCAATCCAAGGTTCATTTAGGATTTAACTCCACTGCGTAGAAGTAGAAAATTTATCAG

ACAAACTGTTTTCTAACCTTCATTCGAAGTATAGACTTATATCCCAACTTTGTGTTAAAGTCCAGAAGAA

TATTTTACTTGGAGAGATGGCCGAGAGGTCTAACGCGTCGGATTGCTAATCCGTTGTACAATCAATATGT

ACCGAGGGTTCGAATCCCTCTCTCTCCTTCAATAATTGATTGATCTGCTGACAGAGCAGTCTCAAGAAAA

CAAACAATATTTTGAATCTAACTTAATCCTTACGCCCAGGGTTCCGTCCAGGATCGTTTGATAAGAATCC

GAAAACGAGAAGGGAAACAAAAAAGATAACTACTGTATAGACAAATAGCTTAAGGGTAAGCATGATCTAA

TCTCCACGGTCATAACTATGGGTAAAATAGAATGGAACATTTTTGTTTGGAATATATATAGATATCTGCT

CCTTCCAACTCACGAGAGAGATATAAGGGATCAGGTGTTTACCAATAAAAATCTATTCTATGTCTGAGAC

TATATAGATCATCCCTAAAACTATATATATATAGTTTTTTTTTTTATCGAGCCGTAAGGGGTGGGGCAAA

TAGAGAAATCCCGAGTTAAGAAACGTTTCATTACCGAAAACTCACCGCAGCCTGCCGCACAAAAGCTAGA

AGAAGAAAAAACACTGGTATGACTGGCATTACATCCACAATTGGATCAAAAATAGCATAAGCTTCGGGTA

ATTTAGCAAAAAAAGCGTCATTGAGGTGAAGAGTATTCTCAAGATAGATGTTATACAAAACTATCATTTT

TATTCTCCAATAACAAAGAATTTTCTTTTGAGACGGTGACATTTTTTGATCGGTCGACCTATCAGGTATA

TACTATTATATATTCTTTCATTCAATTAGGTAGAATAAATAGATTTAATATTCCACCAGACCAAATTATT

AATTGAATGGGTCTATCATTGAGATCTTTCTGAGTTGATTTCATTGAATATTATTAGTTCCCAATTTTAC

TTGGTCCCTTATTGTTGTTGTCCCCACATAACCAAGTCACAAATGAGAAAAGGTTGACAGGAAAACAAAG

TATGAGAGTATCATTATACTGATCATTTATGGGGCGTGGCCAAGCGGTAAGGCAGCGGGTTTTGGTTCCG

TCATTCGGAGGTTCGAATCCTTCCGTCCCAGATCTCGCTATATGGGAAAAATCTATCACGTTTCCGCATA

CTAAAGATTGGGTAAGTTACAGCTGATATTTTTGGCTTTGGCTTATTAACCCCCCCCCCCCCCGTACTAC

TTCTTATTTCCCCTCGATGGATCTTCCAGTTTATATTATGATGATAAGCTGCATATAGCAATAGATCCCT

TTATGACGCGGAACAAAAAAATGATACTAAAACCAATTTATGAAATTAGCTTATTGGATGCATGCTGGAC

CTGCTCACATTGGTACTCTACGAGTAGCCAGTTCTTTCAGGAACGTACATGCTATAATGCATGCCCCTTT

GGGAGATGACTATTTTAATGTAATGCGCTCCACGTCGGAAAGGGAAAGAGATTTTACCCCAGTAACTGCT

AGTGTAGTGGATCGTCACGTATTAGCACGTGGATCTCAAGAAAAGGTTATAAATAATATAAGCCGAAAAG

ATGAGGAATAATGTCCCGATTTGATTGTTTCGACACCTACATGTACCTCTAGTATCTTGCAAGAAGATTT

GCAAAATTTTGTAGATCGAGCCTCCTTATCTTCCAAGTCTGATGTAATTCTCGCGGATGTTAATTACCAT

TGAGTCAATGAGCTTCAAGCGGCGGATAGAACCTTAGAACAAATAGTTCGACACTATTTGGATAGGGCTC

GTAAACAAGGTACATTGGACCGATCCGTCACAGATACACCTTCGGCAAATATTATTGGAATCTCCACGTT

AGGTTTCCATAATCAACATGATTGTCGTGAATTGAAACGTTCACTGCGAGATTTGGGAATCCCAGTCAAT

CAAATAATCCCAGAGGGAGGGTCCCTAAAAGATCTAAAGAATTTACCGAGAGCTTGGTTCAATATAGTTC

CTTATCGCGAAGTGGGTTTAATGACAGCGATTTTTCTAGAAAAAGAGTATGGAATGCCTTACGTATCAGT

AACTCCCATGGGAGTTTTAGATACAGCTGAATTCATTTCACAGATGGAGAAACTTGTCAATGCGTGGGCT

TCGGTCCTCTCAGAAGAAAAAGTTAATTATATATTATATATCAAAAATCAAACCAAATTTGTTTCTCAAG

CGGCTTGGTTTTCAAAATCTATCGATTGTCAGAACCTGTCTGGAAAAGAGGTAGTAATCTTCGGTGATGC

AACTCACGCAGCCTCCATTACTAAAATACTTGTTAGAGAAATGGGAATTCGTGTTCGTTGTTCAGGTACG

TACTGTAAGCATGACACGGAATGGTTCAATGAGCAGGTTCAAGGCTTATGTGACGAAATAATAATCACGG

AGGATCATACTGAAGTTGGAGATACGATAGCTTGTATTGAACCCTCTGCCATATTTGGAACCTAAATGGA

ACGCCATATCGGTAAACGTATCGATATCCCGTGTGGAGTTATTTCCTCACCAGTTCATATTCAGAATTTT

CCCTCGGGACATCGGCCCTTTCTAGGTTACGAAGGAACTAATCAAATAGCTGATCTAGTCTATAATTCGT

TTAATCTGGGTATGGAAGATCATTCACCGGACGTTTTTGGTGGTCATGATACTAAAGAAGTAAGCACTAA

GTCCCTATCCACAGATAGAGATCTTAATTGGACCCCCGAAGCTGAATTAGAATTAAATAAAATACCCGGT

TTTGTAAGGGGTAGAATCAAGAGAAATACCGAAATCTTTGCAAAACAGAATGACATTACAAAAATTACAG

TCGATGTAATGTATGCGGCTAAGGAGAAATTAAGCTCCTAATTTGATATATTATATAAATATTAGTGATT

CAAAATAAAATCTAGGCTATTTAAATTAGAGTTATTCCGCGAATGCGTTGTAAAGGTGATACCAGTAACC

CCGGCCAGGACCATTGCAGTAGCAAATAGTTAACAATAAGAGAATTCTTGATTTCTAGATATTATGGTAA

AACTTCGCTCGAGGCGACATGGTGGGAAGCAACGTGTGGCTCGAACATCGAGATCGTTTTTGCGGAGTCT

AGTAGCCGCCATTTCTTAACGGGAAGATGCTCTCGCTTCAACATTTGTTGAAACCCATTATCAAATGAAA

CTTGAAGAATCCTATCATATATATCGGAACTTACTCATCCTTTTTTTGAGAGGGATAGTGTCTATGGTTA

TTTCTACAGAATGGAGCTGTGAAACCTCGTTATTCCACGGTTGTTTGAGAAAAAAAAAGTGTTCAGGAAC

TTGAAACTAAAATCCATTTGGATTATAAATCAATATCATTGAAGTGAACCGATTTAATTATTCGACCTGA

ATTGAGTCTTGAATTGTCAAATAATAAATCATTCACTCAATGCTATTTTTTATGATGGGTCAGTGAGGAT

AGGTTCTGTTGCTACCAATTCCCGATTTGGATAACCCTTGGGGTTAGCTCAAACCTAAGGATTCTCAGAA

TCGATTTACGAACGAGAGGATACCCGATACGCAATTTAATCCATTGGTAATGGGGGGGTGAAAACTCTGA

TGTTTCTTACGAAGTAATAATTAATTGGTAAAAAGATAACTCAAGAGGTGAAAGAATATCCATATTGCAC

ACACGTGAGTTAGGAGCATTCTCCCCACAATTGAATAGAAAGAAAAAAAAAAACGGAGCATAGTTGAATA

TTTATCTATTTGATTGGAATTGCAACTTAAGCCGTACGAAATTAAAGTTTCATATACGGTTTCACGGGGG

GGAGGGCGGGTAGGTTTACGTGCACCCACCCCGATAAATCACTTACCGAATAATTGCAATTCATGCTCAG

TCCCGGCGAGAGGGAAAGGCCATTAAGGAGGTTGGGTTTCATGATCCGCGGAAAGAGCAAACCCAATTAG

ACGTTTCTGCTATTGCTTCTTTTCTTGAAAGGGGGGCTCAAACAACAGAAACTGTTCGTGATATATCGAA

ACGGGCAAAGGTACCTGAACAAGTCAAAATCAAACTTTAATTAAAAATCAAAATTTAGGAGAATCTAATG

GGCCCAGCTTACATTCCTTTTCAAATGTTTTTATATTACCCTTTTCTCCTACTTATACTCTATATCTATG

CCGTCTTTATCATTCCTTTAAGAAGTAGGGTGTTCAGAAATAAATACTGGTTCTCTATCAAAGATTCCTT

TGAAAGAAGTGATGTCAGACGTTTCTTCACGAAGAGGTGGGGGAAGGGGAGGAAACATGAATAGTTTCAA

TAAAGAAAATTGATTCCTTAAAAATAATGTAAGGGTTGATTATTGATTCTAGATTCAAGGGTTTCGTATC

ATTCTCTGTGAGTCCCTTCAAGAGGCAGTTAGAGTCCGGTAAAGTTTCAAAAATTAGACCGAAGATTATT

TTATTTGGTTGAATATATCTTCGAAAAAAAAAAGTCTTCGATGTTGAAATTACCAATTCGGTTCATTCAG

GGTCCCTCCTTTTGTAAAATTATCCTCCGCCATCCCTCCCCCCCCCTTTTTTTTTTTTTATTTTTAATCT

GGTTATGGTTCATTCCGAATAGATCAAAATTACTACTTATTAAAATTCGATATTCAATGAAGTTGTTGAG

GTAAAATAAAGCGGCGAGCAGTAGGTAACAAATAAGCATAAACAATAGAAATAGACAAAAGTTAGGATCT

TTATTTATTTTAAAGAGATGATTAGTAAAATAGACTTGTATTTGGGGGTATTCATTATTGCCTGGTGCAG

ATTCGCAACTAACTTCTGAAATGAAAGGGTTGATTCATTGGTTTTACAACGATAATCAAATAACTCTATC

TTCAGACGAACTTTCTACAGATAAGGATCCACAGCATGGCGAGAGATAGTTGCTAATATATTGAATATTT

TGAATAAATTCCATTGCGTGAGATCTCGATGCTTGAGGGGTTACTACTACGAGGACCGTTTATGGATCCT

TGTCCAGATTTGGGACGTTACGGAAAAGTAAAAAAATCACTCTCAACCAAGAGTGTTTTTTGTATCCGTT

TTTTCTTAAAGATGATTTTTACTCAATTGCTTATAAGCGTTTTTCAGATGGACCAAGCATTGATCCAGTA

TTTGGGGTGTATAGTATCATATCGGCGAAACGTTTAATTGATAGGATGCGTCACCAAGATTATTCAGAGA

TTATTTATTCAGAATCTGGTTGAATTTAATCCGGTAGCTGGACTGCAGATTCGTATTTTTACGCACTTTT

AAAAACAATATGCTTAGTTTTGGAGATACCCCTTCTGTCTCGGATAATACCTTTAGTTATGAAAAGAAAT

AGTGATTGGAAACCTTCTCAATCCATTCATTCAATATTTCTATTTTTGGAGGATAGATTACCGAAATCCA

ACCATGTTCTAGATACAAAGATACCTCAGAATCTTCATTCAGAGACCCCAATTCGAATGTTTCGTCGACG

AATCCAGGATGCCCCGTTTCCACATCTATCAAGGTTGGCTCTCCATAAATACAGAAATCTGTCTGTAAAA

AGTTGGAAAGGAAATGAAGAAAAGATTGACATTCTACTTTGGAATTTTTACATCTACGAGATTGAATCAT

TACCATTGTTTCTATGGAAACAAGTGTATAGGTCACAATCAATATATTCTGTCTCTACCGATCAGAATAA

CATTACTCGGAAGGAAAGACACGTTTATAGATATGGGCCCCAATTCGATACAGCAAACGTCGATTCTTAC

CTCACTCGGAGTTCGTGCATTCACTATGGAAGATATAAGAATCACTCCCTCATAGCTTTTGGAGGAACCA

GATATTTTGCAATAAAATGGATTTATTCTATTTTGATACTTGTAGAATCCCATTGTCATTATCGGACTGA

ATCTAACCAAATGTGTATCAAATTATTATCCAACGGTTGCGTATCACTCTTAGGTTATACTTTAGGTGTT

CAATCATTAACAAAAAAAGTTCGAGTTGGAGCCACAGAGGGGTCACACATCAGTCTTTCCGGTGCCAAAA

TTTTGTTATCTAAAGTCCCAATTTCGCTTCTAGTTAAGCTTATGGCAAAAGAGAATTTTCGTGACAGTAC

CGGACGTCCAATTAGTAAATTAGCTTGGACTACGTCAACAGATGATGAGATTTTAAATAGATTCGTACAA

ACTTGGAGGATCTTTTCTCTCTATCATAGCGGGTCAATAAATCGAGATGGATTGCGTAGATTGAGATATA

TACTACGATTTTCATGCGATAATACTTTAGCCTGTAAACACAAGAGTGCAACACGCTCGTTGCGACGTAG

ATTTGATTCAGAAATATTATTGGATAATTATTTGAAAAATTCTGAGATGTCTCCTGCGTCCAGTACACTT

AATGTGTTAAATAATCAAAGAGTTTGGCATTTGAGCATAACCCGGCCTATCTTATCGACACTCGGTGCAT

TAGAATTATGAGTCTAACGTATCTGTTTGTATAGATAGACCTATGTTCTCTCCCTCTCTTATCTTTCCCC

TCCCTCGCTCTATTTCATTCAAACCTTGTTGTTGAATCAATTCATTCATCAAATATAAAAATTCTGTTGT

CGCAGTTTACAGAGATACAAAAGTACCTAAATAATTGGTTCATCCTTCAATTTGGATGTGAAACAAATTC

TTCCATCTTCAAATATTACCCTGATTTTTATTACGAATAATGCTGATTATTTCCTCTCACTTCGTAACTT

GTCAATTTTTCCAGAATATATTTTGATTCTCAGTTTAATCACAATTATTGTCATTGATTTGTCATATAAG

GGTAAAGATATACTTTTGCTTCATAGAATTTCACTAATATCTCTGTTAAGTAGTATCGTTCTTTTACTGT

GCCAGTGGGAAGTAAAATCTGTTCCGATTGCTCCTGAAAGTCTTCAGATCAACACCCCTAGCAATATATT

CAGATTATTTCTATTGATTCGCTCACTACTATCTGTTTCATTATCGGTTGATTACGTACGATGCACAAAA

ACAGCTTTAGCAGAATTTTTATTATTTATTTCAACTGCAGGTTCGGGGGGAATGCTTCTGCGTTGCGCGA

ATGATTTGGTAACGATTTATGTAGCCTCGGAGTGCTTAAGCTTATCTTCCTACCTTTTATCTGGATATGC

CAAAAAGGATATAAGGTCGAATGAAGCAACTATAAAATTTTTATTGATGGGCGGAGCAAGTTCCTCCTTT

TTAGTATATGGTTTTTCTCTATTGTATGGCCTTTCTGGTGGAGAGGTTCAACTTAATAAATTAGTTGATG

GACTCCTATCTACTCAGATGTGTGATTCTGTTGCAATCTATACCTCTATTGCGTTTGTTGCGGCAGGAAT

GGCTTTCAAACTTTCTCTCGTTCCATTTCATCAATGGACTCCCGATGTATATGAAGGA

>trnV-GAC

AGGGATATAACTCAGCGGTAGAGTGTCACCTTGACGTGGTGTAAGTCATCAGTTCGAACCTGATTATCCC

TA

>trnL-CAA

GGGGATATGGCGGAATGGTAGACGCTGCGGACTCAATCAGATTGAGCCTAGGTATGGAAACGTACTGAGT

GACAGCTCCCAGATTCAGGGGAACCTAGGATTATTTCGCGGGCAATCCTGAGCCAAATCTCATTTCATCT

ATCTAAATTTTAGATGACGAAGCGAGATAGGTACAGAGACTCGACGGGGGCTATTCCAACGAACAACCTA

TTAATTCTTATTTCTACAGTAACTAAATATTTAACTACCCCATATGGGTGATTGATGGGTGATTGAACGA

GATGAAATACAGGAATATGAAACGAAGAAGTGAAAAAAAAAAAAAAGCTTTTCTAGTTAGATAAGGATCG

AGCGCGACCCCTGTTTCGATCTAGAGTCGACATTCGTTCGCAGAATCACGCCAATATTTGAATCTATAGT

ATATAAAAGATAGAGTCTATTCCTACTAATTTTCATATTCCTTTTCTACCTGTTACAGTGCCTGTCTCCC

GTTGTATTTTAATGAATACTCCTTGACAAGTAGTAGCTAATAATGTTTTCGTGGATAAAGATAGAGTCCC

ATTCTACACGGTTAGTGTAAGTAGCAATGCAAATTGTGGTAGAAAGAAAATCCGTTGGTCTTTATAGGAC

CGTGAGGGTTCAAGTCCCTCTATCCCCA

>trnR-ACG

GGGCCTGTAGCTCAGGGGATTAGAGCGCGTGGCTACGAACCACGTTGTCGGGGGTTCGAATCCCTCCTCG

CCCA

>trnM-CAU

GCCTACTTAACTCAGCGGTTAGAGTATCGCTTTCATACGGCGAGAGGCATTGGTTCGAATCCAATAGTAG

GTA

>rrn23

TTCAAACGAGAAAGGGCTTACGGTGGATACCTAGGCACCCAGAGACGAAGAAGGGCGTGGTAAACGACGA

AATGCTTCGGGGAGCTGAAAATAGGCATAGATCCGGAGATTCCCGAATAGGTTAACCTTCTGAACTGCCT

GCTGAATTCATAGGCAGACAAGAGACAACCCGGCGAACTGAAACATCTTAGTAGCCAGAGGAAGAGAAAG

CAAAAGCGATTCCCCCAGTAACGGCGAGTGAAATGGGAATAGCCTAAACCGTGAAAACGGGGTTGTGGGA

GAGCGATGAGGGCTTTGTTTTGCTAGGCGAAGCAGTTGAGTACTGCACCCCAGATGGTGAGAGTCCAGTA

GCCGGAAGTACGGCTGGCTTACGCTCCAACCCGAGTAGCATGGGGCACGCGAAATCCCGTGTGAATCAGC

AAGGACCACCTTGCAAGGCTAAATACTCCTGAGTGACCGATAGCGAAGCAGTACCGTGAGGGAAAGGTGA

AAAGAACCCCCATCGGGGAGTGAAATAGAACATGAAACCGTGAGCTCCCAAGCAGTGGGAGGAGAATCGG

ATCTCTGACCGCGTGCCTGTTGAAGAATGAGCCGGCGACTTATAGGCAGTGGCCCGGTTAAGGGGAGACC

CCCCGGAGCCGTAGCGAAAGCGAGTCTTGCTGGGGCAATTGTCACTGTTTATAAACCCGAACCTGGGTGA

TCTATCCATGACCAGGATGAAGCTTGGGTGAAGCTAAGTGGAGGTCCGAACCGACTGATGTTGAAAAATC

AGCGGATGAGTTGTGGTTAGGGGTGAAATGCCACTCGAACCCAGAGCTAGCTGGTTCTCCCCGAAATGCG

TTGAGGCGCAGCAGTTGACTAGACTATCTAGGGGTAAAGCACTGTTCCGGTGCGGGCTGCGAGAGCGGTA

CCAAATCGAGGCAAACTCTGAATACTAGATGTGACCTCCAAATGCGGAGGGAAAAAGGGTCAACCAGTGA

GACGATGGGGGATAAGCTTCATCGTCGAGAGGGGAACAGCCCAGATCACCAGCTAAGGCCCCTAAATGGC

CGCTCAGTGGTAAAGGAGGTAAGAGTGCAAAGACAGCCAGGAGGTTTGCCTAGAAGCAGCCACCCTTGAA

AGAGTGCGTAATAGCTCACTGATCAAGCGCTCTTGCGCCGAAGATGAACGGGACTAAGCGGTCTGCCGAA

GCTGTGGGATGTCAAGACACATCGGTAGGGGAGCGTTCCGTCCCAGGTAGAAGCACCAGTGTAAGCAGGT

GTGGACAAAGCGGAAGCGAGAATGTCGGCTTGAGTAACGCAAACATTGGTGAGAATCCAATGCCCCGAAA

ACCTAAGGGTTCCTCCGCAAGGTTCGTCCACGGAGGGTGAGTCAGGGCCTAAGATCAGGCCGAAAGGCGT

AGTCGATGGACAACGGGTTAATATTCCTGTACTGCCCCTTGTTGGTCCCGAGGGACGGAGGAGGCTAGGT

TAGCCGAAGGATGGTTATCGGTTTAAGGACGCAAAGTTAATAGACCCATCAAGGGTAATAAGGGGTAGAG

AAAATGCCTCGAGCCAACGTCCGAGCACTAGGCGCTACGGCGCCGAAGTAACCCACGCCACACTCCCAAG

AAAAGCTCGAACGACCTTTGACAAGTGGGTACCTGTACCCGAAACCGACACAGGTGGGTAGGTAGAGAAT

ACCTAGGGGCGCGAGACAACTTTCTCTAAGGAACTCGGCAAAATGGCCCCGTAACTTCGGGAGAAGGGGT

GCCTCCTCACAAAGGAGGTCGCAGTGACCAGGCCCAGGCGACTGTTTACCAAAAACACAGGTCTCCGCAA

AGTCGTAAGACCATGTATGGGGGCTGACGCCTGCCCAGTGCCGGAAGGTTAAGGGAGTCGGTGACCTGAT

GACGGGTAAGCCGGCGACCGAAGCCCCGGTGAACGGCGGCCGTAACTATAACGGTCCTAAGGTAGCGAAA

TTCCTTGTCGGGTAAGTTCCGACCCGCACGAAAGGCGTAACGATCTGGGCACTGTCTCGGAGAAAGACTC

GGTGAAATAGACATGTCTGTGAAGATGCGGACTACCCGCACCTGGACAGAAAGACCCTATGAAGCTTCAC

TGTTCCCTGGGATTGGCTTCGGGCTCTTCTTGCGCAGCTTAGGTGGAAGGCAAAGAGGGTTCCTTTCCGG

GGGGGCCTGAGCCATCAGTGAGATACCACTCTAGAAGAGCTAGAATTCTAACCTTGTGTCAAGAATTACG

GGCCAAGGAACAGTCCCAGGTAGACAGTTTCTATGGGGCGTAGGCCTCCTAAAGGGTAACGGAGGCGTGC

AAAGGTTTCCTCAGGCTGGACGGAAATCAGCCTTCGAGTGCAAAGGCAGAAGGGAGCTTGACTGCAAGAC

CTACCAGTCGAGCAGGGACGAAAGTCGGCCTTAGTGATCCGACGGTGCCGAGTGGAAGGGCCGTCGCTCA

ACGGATAAAAGTTACTCTAGGGATAACAGGCTGATCTTCCCCAAGAGTTCACATCGACGGGAAGGTTTGG

CACCTCGATGTCGGCTCTTCGCCACCTGGGGCGGTAGTACGTCCCAAGGGTTGGGCTGTTCGCCCATTAA

AGCGGTACGTGAGCTGGGTTCAGAACGTCGTGAGACAGTTCGGTCCATATCCGGTGCGGGCGTTAGAGCA

TTGAGGGGACCTTTCCCTAGTACGAGAGGACCGGGAAGGACGCACCTCTGGTGTACCAGTTATCGTGCCC

ACGGTAAACGCTGGGTAGCCAAGTGCGGAGCGGATAACTGCTGAAAGCATCTAAGTAGGAAGCCCACCCC

AGGATGAGTGCTCTCCT

>rrn4.5

TAAGGTCACGGCAAGACGAGCCGTTTATCACCACGATAGGTGCCAAGTGGAGGTGCAGTAATGTATGCAG

CTGAGGCATCCTAACAGACCGAGAGGTTTGAAC

>trnC-GCA

GGCGATATAGTCAAGTGGTAAGACGGAGGATTGCAAATCCTTCATCCCCCAGTTCGAATCTGGGTGTCGC

CT

>ndhC

ATGTTTTTGCTCCATAAACACGATTCTTTTTGGATTTTTCTACTAATATCTATATCTATTCCCTATTTAG

CTTTTTTGATTCCCCGACTTCTCGCCCCCATCCGAGAGGGACCAGAAAAATTGGCAAGTTACGAGTCGGG

TATTGAACCAAAGGGAAATACCTGGATTCGATTCCAGATCCGTTATTACATGTTTGCTTCGGTATTTGCA

ATCTCCGACGTCGAGACAGTCTTTCTTTATCCTTGGGCTATAGGTTTCAGGGAATTGGGTCTATTCGCCT

TCATTGAAGTGATCATCCTTATACTTATATTAATTGTTGGTTCGGTTCATGCATGGAGAAAAGGAGCATT

GGAATGGTCTCAA

>psbM

ACGGAAGTCAATATTGTTGCGTTTGTAGCCACTGCACTTTTCATCCTAATCCCCACAGCTTTTCCACTCA

TTCTTTACATTCAAACGGCCGCTCAAAATAATTAA

>ycf2

ATGAAAAAAGAAAATAAGGTAGAAAGGGTGGGAAAAAAAAGAGTAGGAAGTCCATATTCTCTATCTAAAG

TTCCGGGGTTAGTAGAAATCAGTAGATTAGACTACTTCTTCGAATCATTGAAGAACCAACATCTCAAAGA

ATTTTTAATTGGTCCATTGTCTAGTTATGAACCTTTTATCAGATTATTTGACTTATGGATTCTAAGTTCA

CTATTTCTACGCAATCTGCGTCATTCAGTAAAGAGGGGTAGTAGCATCACCTTGGAAATCCTAATGTTAC

TAACAATACCAATTTCTATGCATTGCTTAAGTGATAGAAGTTCGATCGAAAGAAGTTCTATATTAGCGAA

AATAATTAATGGGGGTGGTGGAGTAAGAAAAGAACAAGCAGAAAATTCTGGTGACTTATCCTACTACTTT

CTTCAATCCAAAAGATCTTTATCTGTTGAAAAGGATGGGAAGAGAAGAACACCTGATTCTTACTATTTAG

GTTCGAACGAAGATATTTCCACAGGTTCGACGAGAGAAGAAAAGCAAGTTCGTTATGGTGCAATGAATCC

TCTGGTTTCAGGTAGATGGAAGGTCTGCATAGTGAGGGATTCACTCCCTGGCGAGGACATATCCAGAGAT

GAGACTGAGAGGATTCAGATATTATGGAGGGATAGGTTTTTCAAATTCTATAAACATGTGGGACTTTATC

AAAATAAAATTAAAAGTGACTGTTACCAAAATGATTCTGATTCGTTATTCTCCTGAAAAATCCATAACAA

GCAAGATCTGGATCGACTACAAACAACAAGATTGAGGGAGGCCTTTTCCTATTTGTCTTCATTTCCATCT

TGTAAAAATACAATGTCGTCTCGTGATGGTATATCCGGGTTAGATTGTCACGAAAATGGGGGAGACTCTC

CTATTCTACACACTTATTCACAAATAAGAAATGAATTAATAAATGGACTCACTGGATTTATTTTGATAAT

TGAGGAATCGAATCCGATTTCTAATGGGGCAATAATTATTGATATTAATAGTAATGAGAAATCTGGGAAA

GGATTTCCATTGAAAATGACAAAGAATCTATCATTTACTAGGATATTTGGCAAGAAACTAGGGTTGCCGA

GTAGCAAATACTTTGACCTCAATAAAATTCTTCCACGATATTTTAAAATATCTTTAGGTATACCTAGAGA

AGTAACTAATAGAATTGAAAATACTACTTTTTTAAATGAATTGAAAGGAAAAGATAACATACATTCAATA

TATTCTCTAGTTAGGTTGTATGGACGAAATAGATTGATACCTCTCTACTCAACATACACACTTCTTTTAT

ATGACTATTTCTGTGCATTAGCTAGTGAATATTTCTTCCGAATCAAATATCGGTTGGATGGCTGGGCGGG

GAGCGGGGAATCCACCGGTGTAACAAGAATTGCAACTGAATAAAGATTATTGAAATGGAAAGATAACACA

GAGCGTTTGTTGAACGAGTATATTACCTTCCGAATCGATGAGTATAGGAATGTTCAGTCAAATGCGCCTA

GATGGCTTGATACAACCAGAGATTCGTCTTTTTCCCCTTTCGGGAGAGTCTTTTTAGAAATAAAGTATGA

CTTGGATAAATCGATTTGCGGTGTATCAATAATGAGAAACAAATTACTAAATAGTATTGGTACTAGTATT

AATAACACCACTCAGAATAACGAGAAGTATCCTCATCGATTTCTCAATGTTTTATTTCTTTACAAAATGA

TTGTTACCGAGGTTACTCGCCAAGAAGTTCTGATAGATACGATTGATTATTGCATCGAGAAATTGAACGA

TATAGATCTTTCGATGCTTGATCCCTTATCGGGTTTACTCGATATTGACATTGACGAACAGATATCTTTC

CTCAAAAGAATTCTCGAGAGAAAAAAGAGTTTATTCATTGAGTCCAGATTGTTAGTGGATAAAAAAGCGA

TAGGCTCTTCAATCTCACTAGAACCCGCAGCGAATCCGCCTCTTGTTGGATTACCCCGCATCGAATCTAT

CCGAACAGGATTTTCAAGTGATGCTCTTTCCACTACGGGGAGGCAGAATTGGAATCTGTTTCTAGATAAT

TCAAGTCGTGGGAGAGGTTCAAATAAAGATATTGGTGAGAGTATTTCAAGATACATTTCCGATGAAGTGA

ATACACTAAACTTTCTAGACCACTCTAATCTACCTGTATGGAACTATGCTAGAAGCAATTTCATTCCGAG

AACCAAAAGGGATTTCCTTATTGGGAGATGTAGCAGTAGTTATTCCAACGTCTTAGAGAATTTCTATGTG

GGCTCCGATAATGAAGTCATCTCATCTAATATCATCTCATCTATTCAGTCTCAACTGTCGGATTCATTAT

CACCCAATTTATCGAAACGAACAGAAGGGGAAACTGTTGATCATGTACTCACAACAGTTCAACCTATTCT

GTCTAATCTGCATGAATCTGCAACATTATTATTAACTCATTCAGATAGACTTTTTAAGTCTATTTCAGAT

CTGAAAAGATTACTGTCGAAGTTGAACTCATCTCCTCGTGAAACGAGAGATTCGTTTCTATCTTCGTGCA

GTAGCGATGGATTTTATTTGGAAATGGAAAAAACGTTGATAAACTCTAATCCATCGGCGGATCGGCGACC

CCGACCTTGTCCTAAGAATCTGGAATTGGATCAAGTCAATTCAGAGAAGTCTATTGAAGATAGATCAGAC

TCGGGGAATGTTTCCACCAAGAATCGATTCTATCAAAATGATCCATCTATTGGGTATTTCTGGGAACCAG

AAGAATTAGAAACGCTTTACTGGTCGCTAAGATTCTCATTACGCAACGATGTAACATCAAGATCTCTAAT

AGGATTGATTGGGAAGAAGGTTCCGCACGAAGATACGAAGTTTGCAGATCCATATATTCGTAAAGAGCCT

ATCCGTCCATCCCATTTCATCAATTTCAATGAATTATCAAAAGATTTGAACAAATATAAGATCTCTTGGA

TCTTTTGGAAAGACAATATCTGTGAAAAATGGAGCCTATTCAGAGAGTATATACCTTGGTTTTTTACCCC

TAACCGGTGGAGATACTTCTACGATCCGATTAGAGAAACATATCCAGAAATAGTACTTAAAATAAGTGAT

GACTCGAATCATAATCTACCTAGAATTTATAAAAGAATTGCTGAGGATATAGATGGTGCCAAAGCTTATT

TATTCCAAAGCCTAGAATTGAGATTCAAAACTGATTCCATCAATACCATATTATCCAGGATAGATCTTCT

TCTTTTCAAAGAAATTACTAATGAAACGAAGATGTCACATTCAGGATGGTCAGTATCTCAATTTTCCAAT

AAGTCTATCTTATCTTACCTTATTCTCTCAATATTATTCGTTCTTGCATTCTCCAAGCACCATTTGTCTG

CCGTTTCGGGTTCTAATTCCCTTCATTCATGGAAACGTTTCGATACTATTGGATATTTAATAGACCCAAT

GCGTGGATCCTATTTGAAAAAGGTAATGTATTCCCCTTCGACAAGGTAAATGTAAACGAAAGATCTACTA

ATCTATTCTTTGAAGAGATTCTTGAATTATATAAATAATATAATCTTTTTCTCCTTCGTGAAAAATGAAC

TAGATTCATGGATACTTTGTAGGGAAAGCTCCGATACCCTTAATAGTAAGAAAGAACTATTGACTCAATA

TTTAGTAACGAATAAAATTATTTCCAAGTATGAGTCGAAATTGAATTCCAATTCTGATTTATCGAGCAAT

GAGATTGATCATGAACCTTTCCCACAAGAAAGATCTAATGTTTTGGCATACCTACTCCAATTCCGTCAAA

ATGATCTATTAAGTTACGAGATCCGTAAGTTGGATCCTGCGGAGAAGTGGGCTCTTTCCGCCCCCGAGAG

AAATATTCTATTTTCAGCAACGACGAGACGAAGAGGCATTCTAAATATGCCATGTCATGACATACCTATC

TCACTCTAATCAGGATTATTACCATCTAAAGGAATTCCGGTAGTAGGACCCACAGAAACTGGACGATCTT

CCGTTATTAGGGATGTAGCATCCAATTCCTACTTCCCGTTGATGAGGCTACCACTAAGAAAGTTGCTATA

CAATCGATCATATTTCAATAATATACATGGAAATTTCATCTCGAAAGAGAGTGTACACCGATTAAATCTC

ATTTTTGCAATAGCGAGAGAGGTGTCTCCCTGTACAATATGGATTCAAGATATTCATGAATTGAATGTTC

ATCGCTCGTATCATAGACTAGAAGCTGATCCCAGATTCTTACTTTGCCCAATATTGAGGAGTATTGGTTA

TGGGCGCAGTAATTCTCGCATTCGTAAGAATATTGTTATTGCTTCGACTCATGTACCTGCAAGGGTAGAT

CCAGCTCCAATAGCTCCGAACCGGTTAAACTAATTGATAAATTTCCGAAAGTCCAACAGGTGTCAACGTC

AGAAAGAATTGTCAATTCTCTTACGTATCAAAGGCTTCAAAATAGAGGCTAATCCGCCTCTTCTTGAAGG

TACTGGGTCTGGAACTACGGGTTATAGCAAACGAGATTTATTCCTTTCTGCTAATGAAGCATTATTAATC

GGTACTTCCAAAAGGAAAAAGATTGTATGTAGTGATGCAATTGGATTAGCGTCACATAGACAACATTCAA

TTGTTACTTATATGGGCAATGGAATAGAATCCAGTTCTGAATACGAAATCTCTTCTCAGAGGATAGGAGA

AGCTATTCTAAAAAATAGTTTGATAGATACTTATCCCACAAATATTCTATTTATTGGTAGTAATGCGTCA

AAGAGGCGATTTTATCATTTGTCTAACTGGTATGTGGAACCTTCAATAACCGAGTCAACAATTAAGGAAT

TCACTCTATTTTCGCATATCCTAGGGCTACTGGCTGGATTAGCGGCTCGCGATTCGTTCAAAATGGATAT

GAGAAAGAAAGAAAATTTCATTGTTATTGATAAACTTGTAGAGAATGACTTTAACCTAGCGTGTGGTGTT

CTAGAAAACCTTTCAAAGGATTTTTCATGTTCAGAAATCTGTAGAAGCAGAAGTCAATCCAATAATAGTC

TTTCTTTTCCTTCTCCTACTGAACCCAGGTACTGTTCAGATATAACCTATACAAGTCGTTCTTCTAAATC

TACGAGAAAAGGGGTGTTTAATCCTCTAACCGACTTCGAAATGAAACAGTCACCCGAAATAGACTTAATT

CCGACGGAAGTATCGCGTGAGATTGCTTGGTCCCCTAAGGCTTGGCGTCTAAGTTTCATGCGAAGTGGTA

CTTATGAATCGATAAGAGTCTTATCCGAATTCAATAATTTGTATAATCTAATCCTCCTTTACCAAAATCA

GAATCAAATACCCCAACGGGATTTCGAATTGAATAAGATTAAGTATAGTGAAAATAGATCGTATGAGAAA

AAAGGATATCTTTTCAGTTATAAGAGAGCTTTAGGTAGGTTGAGACAAAGATATATTAAAAGATTGGAAA

ACCGATTGGATAATATCTCGTTACGTGAGCAATTTCTCGAATTGGGAATCTCCGACTCATCTAATCAATA

TGAAATACAATGTAATCGATCCGATGAACCGACTCGATTCTTAGGGGGGCGCTTCATCTGGGACCCTATG

CTTCTATTCCAGCCGGATCCTAATATTCCCTCCTCGCGTCGTAGTTTATTAGCAAATCAAGAACTGGTGC

GGAGGCTTTACGTAACTTACGGTATGAGAAGGGAGCGCGAAAAACATTTCTCAAACGAAAAGATTAAAAA

TTTCTTTCTCTATCGTGGATATGATCCGAAATCGATAGCTGAATCATCTATTAAGCGGTGGAATAATTTT

CCTTTGGATGAGGAGCGACATTCCGAATACGTCAAAGAAACTTAGTTTATGCATATACATCTGCAATATC

CACAGATATTTGTTCCCATTCACTTGTATCAAAGCATTGTAGTAGAAGATTTGCAAGAGCGATTTATTCG

TTTTAGGCTTCTGGTTCATAGAAATAGATGGATGAGACGGAACCGTTCCCCATTTAAGGATTTTCTTATC

TATAATATGTTGCTTGAAACTTATTAATATCTATTCAATCCGTTCCAGTTTGGTGGGACGTCACTGGATC

AAATAACGAAACAATTTCTTAATGAAAGTTCAATATCATATAAGAAAATCTTAGATACTATTCATTCAGT

CTAG

>trnS-CGA

GGAGAAATGGCAGAGTGGTCAATTGCGACGATCTCGAAAATCGTTTTAGCCTTGGTTAACGAGGGTTCGA

ATCCCTCTTTCTCCG

>trnT-UGU

TCACTCGTCTATTCCGGAGGAGATATAAGTATTTCCGCACGATGCACAATTGGGGTTGTGCAGTAACAAC

CCCTGCTACTACATTTAAGTATCTAGGCGAAAAAAAAATGCCCTTCTTTTTTGTTTCTTCCTATGGTATC

ATTATTCTGATAATGAAGAAAAGATGTGCTCGCGAGAGAGACGTGGGCTTGTTAGATCGTGATAAAATTC

TCTGTAAGAAGGGAGAATTGATCACCCCTTTAGGGATGATTGATTGTGGGCGAGGAGGCAGTCGAACCCT

CGACCATCCCAGTATCTAAGGGATACCTTACCACCCTACGAAGAAACGATGAGTAATTAAAAAGGTCCGG

GGGCTTTCCTTAAACCTGAATGAAGTCTTATATTTGATAAGTTTGGGAAAGAAAAAAGGAAAATTCAGTT

CAGCACGGTTGACAAGCATATATATATATCTGTAGAATTGAAATGGTGAACGTAACTCTACTATGTTCTC

CTGCCTCGAGAGAAAGGTAAGCACACTAGACTCAAAATATAGTCCTGCAGAGGACGGGGGTTCGAATCCT

CCGCGAGGCT

>trnK-UUU

GGGTTGCTAACTCAATGGTAGAGTACTCGGCTTTTAAGTGCGACTAGGGAATTTTATACATTTTAGTGAA

GTTCAAATTCATCTAAACCTTTGGTTAGGTTTGTTAGACTACGACTGATCCTTGGCTCGAAGGAAAATGC

AGCATGTCGTTCTTATCCATATGGAATCGTGAAAAGATATGATCTTATTAATTGACCATACATTAATAGA

TTACCAAAATAGGAAAGATCGGAAGAAAAGCAAAGTATCAAATCAATTTGATACGTTGACTTACTATTCG

AAGTCAAAGGAGTTAATGGATAAAGCTAGATAGCTTGAATCAAAGGTAAAACCAGAAGAACGAGCTTCTG

TTCATTGACCTATTCTTTCGAACTCTCTTTACTAATTAGTGGTTAAAAGCTAATTGGAAGCCAATGATAG

GAGGGGTTCATTCCCATTAAAGGAACACTGTTACCTAAAAGGAGTCCTAATTACTCAAAGAAAAAAAAAG

ATATATATGTGTGTAAAAAACCTGTTTGCTAACTTATGAAAAGAATTATTCATTTCAAAAGTTGGGAGAG

CAATCGACTCTCGATCAAAATAGATTGATGGAATCTTCTCCTTAATAAACAAGATTGAAAGGACAGTTTC

TAATATGTCATATGGAATCCCTGAAGAGGTATTTCCTATACTATATAGGAATTCTATCAACCTATCATCG

AATAGATTGCACTATGTAATATCTCAAAATTTGATAGGGTACTCTCATGAGAACCATAAATAAAATCTTA

GACAAGATTGGTAAAGTCCAAAAGGGAAAAAGTCTTTTATGGCAACTGTACCCTTTACTATTTCGTGAGG

ATCTTTATGCAATAGCTTATAATCGTTCGTCTAGTGAATTAAGTCTGAAATCAATGAAACATCGAGATTC

ATCTGATAGATACAGTTTAGTCATAATAAAACGTTTGATCAATCGGATACGTAACCAAACGACCTCAAAG

TTGCTTTTTCAAGGTTCTGATCGAAAAAATTTAAAAATAAATCGTTCTTTATTTGAAGGTCTAACAGTAC

TTTTTGAGATGATCATTCCAGTTGAATCAAGACCCTTAGTGCAATATCAAAGTGAATGGAATAGTCTCCA

ATCTATTCACTCAATTTTTCTTTTTATGGAAGACAGGTTCTTTTATTCCAATTCTATTTTGGGCTTAAAG

ATACCTTATTACTTTCATCCGGAAATGATTATTCGACTCTTTCGTCGACGTATCAAGGATGTTTTTTTAT

TACACTTAGTAAGATTACTATTTCACAATTATCAGAATCCTTTTGTTCCAGAGACATCCTTGTTTTATTC

CCTTAAGGATAGTCAAAAAAGGTTGTCTATTCTTTTACGGAATCATTATTTCTATGAGTTTGAAAATCAA

TTAGTTCCTTTATGGAAGCGATTCGTCCAGTTGCAATCGCTTTCTCATAGATTTCTAATGGATCAAACAA

ATCCTCTTTACAAAATGAAACATGGTTTAGGATCTCTTCAACCGTTTCTATCAGAGATCAATTTACTTGA

AACTCCTTGTATACACTATGTAAGATATGAAAATCATTCTATTATAGCGTTTAAAGGAACTAAATCTATT

GTGAATAAATGGATAAAATATCTAGTTGGATTCTGGCAATACAACTATCATTATTGGTTACAACCTTGTC

AAATAGATATAAGAAGACCCTCACGTCGTTGTTTCTCTTTTATGGGTTATATCTTGGGTTTTCGATCCAG

AATGATAAAGGTTCATACCAAAAGGATAGATGAATCATCTACTACTCATTGTATTATAAAAGAATTCTGT

GCTAGTATTCCAACATCATCTTTAATAGAATCTCTAACAAGAGAAGGCTTTTGTGATAGTTCGGGTCGTC

CTGTTGGTCGATCAACTTGGACTATTCTAAAGGATGATGATATTTTGAATAAATATCATCAAATATGGGG

AGATTTATCTTGCTATTATAGTGGATCATTTAGTAGAGACGGTTTATGGAGAGCCAAATATATACTTCAA

CTCTCATGTGCCAAGACTTTAGCTCAGAAACATAAAAGCACAACACGTGTAGTTCGAAATCATTTTGGTT

TGAAGTTCATTACAACATTAAACTCAGTTAAAAATCCTTTTTTCATAGGTTCTCAAGAATATTCACATAG

GAAGAATTTTTGGTGTCTAGATATCATCCGAATGAATTCACTAGTTAATTTAATCAATATGAAAAAAGAA

AGTCTGAGTAGTTCTTAAGTAAGATTTACTCAGTTTCTTTTTATTAAATTATGATAGCAATTGCTAAGAT

TCTTTATCAATGGAAAACTAAGAGTACTTTTTGGGATAAATACACAGAGAAAGCCGTGTGCTATGAAAGT

AGCAAGCACGGTTTGGGAAGAGATGCTTTATTATTTTATCACCATAAAATAAAGTATCCACTTTCATCCG

ACAAGTTCCGGGTTCGACCCCCGGGCAACCCA

>rpoC1

ACGATTCATCGAACTAATTATCAACAACTTCGGATTGGACTGGCTTCCCCCGACCAGATTCGCAGTTGGG

CTGAAAGAGAGTTACCTAATGGAGACATCGTTGGGCAAGTTGATTAACCTTATACGTTGCATTACAAGAC

TCATAAACCAGAGAGAGATGGTTCATTTTGTGAAAGAATATTTGGGCCCATAAAGAGTGGAGTTTGTGCT

CGCGGAAACTACCGATCTGTCGATAATGAAGAGGAATATTCAAATTCTCGTAAGCATTGTGGAGTCGAGT

TTACTGACTCTCGGGTTCGAAGATACCGAATGGGATATATTAAACTAGCATGTCCAGTAACCCACGTATG

GTTCTCAAAACGAATCCCCAGTTACATTGCAAATCTCCTTGCTAAACCTCTCAAAGAACTAGAAAGCCCA

GTATATTGCGATGCGTGACTTGATTGTATGTTTCGATTATCACAGATTAATTACAATCTGTCATCCTATA

CGACGATGGGATGCCTCCAATTCCGACATATTTCTCACGAGCGAGGAATATCGCGTAACTCGGGATAAAA

AGTACTATGTACAGAGTACAGGCTGAGGGCTCTCTTCCAGGGTTAGTTTTTATTGATTAATCCATCGATT

AGGCTTCGTAATAAAGGTTTTTATCTCACATTCATGATTTGACAAGAAAGAATCCAAGTGTTTTCGACAC

GATCTTTCACTCAAACTTCTTCTTCTTTTTTCAAGAAGAGTTTATTTTCTGATAGAAATATGGTTATGAA

AACTTAATCATCGCAAAGGCTTTTCAAATCGATTGATAACCATCGGAGTGGAGTGGAAACCCAAAGAGGA

GAAACGGTCGTATTAGGAACAAGAAAAATCTCCCCAACCTCTGACCAAAACGAGAGGGAATAAGTAAAAA

AAAAAAAATTAGTATTTCTGTGAAGATGTGGATAATGTAATAGGGAGGGGGGGGGTAGAGCTGAGACTAC

TCAAGAAAGGTAAGTTCGAACTTGAGTAATGAACAGCTATTTCATTCTCTATAGATGGGGTGGGATTATC

GTGCCCCAAAAACGTCATATCGTACTGTCGGAACTTCACACTTAGATATAGTTATTTGAGCCGGATGAGA

GGAAACACTCGTGTCCGATTCTCTGGGGGGGGGTATTCATTCGACCTATCCCAATCTTTTTCCTGCTAGG

CCTATGGCTGAGAGACCTACTCTATTAAGATTGCGGGGTTTGTTCAATTATGAGGATCGATCCTGGAAAA

ATATTCTTCCCATCTTTTTTCCCACCCGGAACTTTGAAAATCTTCAAGAAAACGAAATAGCTACTGGAGG

GGATGCCATTAAAAAATGATTAGCTAGCTTAGATCTGCAGAGTGTTATGGATCGTGCGTATTTGGAGTGG

CAGGCACTGACGAAGCAAGGATCTATCGGGAATGAATGGGAAGACCGAACAATTCAAAGGAGGAAAGATC

TTTTGGTCAGACGGATGAAATTAGCCAAGGATTTTCTCCAAACAAATCTAAAACCAGAATGGATGGTTCT

GAATCTTTTACCAGTCCTTCCACCCGAATTGAGGCCAATAGTTGAACTATATGAAGGCGAATTAATTACT

TCTGATCTTAATGAGCTTTATAGAAAGATAATTCATCGAAATAATACTCTTATCGAATTTCTATCGGGAA

GTGAATTCACACCCGAAGGACTGATTGTCTGCCAGAAGAGACTCATTCAAGAAGCCGTGGATGCCCCTAT

TGATAATGGTATACGTGGACAACCAATGAAGGATATTAATAACAGGCCTTACAAATCTTTCTCAGAGGTT

ATTGAGGGCAAAGAGGGACGATTTCGTGAGAATTTGCTCGGAAAGCGGGTCGATTATTTAGGTCGTTCCG

TTATTGTAGTAGGTCCGTCTCTTCCATTACATCAATGTGGATTACCCCGAGAATTGTCGATCGAGCTTTC

CCAAGCCTTTGTAATTCGTAACTTGATTGGTTGACACCTTGCTCGTAATCTACGAGCTGCTAAGAATATG

ATTAGAAAAAAAGACCCCATTATATGGAAAGTTCTTCGGGAAGTTATGCAAGGTCATCCCGTACCGCTGA

ATCGAGCACCTACATTGCACAGATTGGGTATACAAGCATTTCAACCCATTTTAATAGAAGGACGCGCCAT

TCGTTTGCATCCATTGGTTTGTGGGGGGTCTAACGCAGATCTTGACGGAGATCAGATGGCTGTCCATGTA

CCTTTATCTCTAGAAGCTCAGATTGAAGCTCGTTTTTCAATGTTTTCGCACACAAATCTATTGTCCCCTG

CTACGGGAGATCCCGTATCTGTACCGAGTCAAGACATGCTTCTCGGTCTTTATATACTAACAATTGATAA

TAGGCAAGGAATTTATGGAAATAGGCATTCTACTTTTATAGGCTCCTCTCCCAATATACCCTATTTTACT

AGTTACTACGATATACTTAGGGCCAAGGAATTAAAACAAATTGATTTCTATAGTTCTTTGTGGCTTCGGT

GGGGGATTGATTTGCAAACGATCAGTTCGAGAATTCGTGAATTGCCTATTGAATCTCAATATGAACCCTC

AGGAACATCTTTCCACTCTTACGATAATTACCAAATCAGAAAGTGTAGGGAGGGCCATATCCTTGGTATG

TATATACTTACAACAGCTGGGCGTATCTTGTTCAATCAGCAATTAAAGGAAGCGATGCAAGGTATATCAA

AAGCTTCTTTTCCGTGTGGAACTTCGGCCATACCAAGTACAATGATACAAGAAAATAATTTTTAG
